# Supplementary material for: The C–I⋯O halogen bonding in crown ether chemistry
Source: Royal Society of Chemistry journal article supplement (doi:10.1039/d4ce00853g), 2024-01-01

Electronic Supplementary Material (ESI) for CrystEngComm.  
This journal is © The Royal Society of Chemistry 2024

## Electronic Supplementary Information

### The C–I $\cdots$ O halogen bonding in crown ether chemistry

Weizhou Wang\* and Baoming Ji\*

College of Chemistry and Chemical Engineering, Luoyang Normal University, Luoyang 471934, P.  
R. China

E-mail: wzw@lynu.edu.cn; lyhxxjbm@126.com

## Contents

### S1. Methods

#### S1.1. Cocrystal synthesis

#### S1.2. Single-crystal X-ray diffraction

#### S1.3. Computational details

### S2. The crystallographic data and structure refinement parameters for the thirteen cocrystals

### S3. The I...O distance, ratio of the I...O distance to the sum of the van der Waals radii of I and O, and C-I...O angle for the thirteen cocrystals

### S4. The unit cells for the thirteen cocrystals

### S5. The bond paths and bond critical points for the dimers in Fig. 4

### S6. References

### S7. The CheckCIF reports for the thirteen cocrystals

## S1. Methods

### S1.1. Cocrystal synthesis

The 12-crown-4 (purity  $\geq 98\%$ ), 15-crown-5 (purity  $\geq 98\%$ ), 18-crown-6 (purity  $\geq 98\%$ ), 1,2-diiodotetrafluorobenzene (purity  $\geq 98\%$ ), 1,3-diiodotetrafluorobenzene (purity  $\geq 98\%$ ), 1,4-diiodotetrafluorobenzene (purity  $\geq 98\%$ ), 1,3,5-trifluoro-2,4,6-triiodobenzene (purity  $\geq 98\%$ ), and the solvent *n*-heptane (analytical reagent grade) were purchased from J&K Scientific Ltd. in China. Unless otherwise stated, all of them were used as received. The synthetic procedure of each cocrystal is almost the same. Using *n*-heptane as solvent, we prepared the solutions of binary mixtures of **C4**, **C5** or **C6** with **I12**, **I13**, **I14**, and **I135**, respectively, in 1:1 molar ratio by gently stirring in the air at room temperature. After a few days, single crystals of thirteen cocrystals suitable for single-crystal X-ray diffraction analyses were successfully synthesized by slowly evaporating these solutions also in the air and at room temperature.

### S1.2. Single-crystal X-ray diffraction

Single-crystal X-ray diffraction data were gathered on the Bruker D8 or Oxford Diffraction SuperNova area-detector diffractometer equipped with the Mo-K $\alpha$  X-ray source ( $\lambda = 0.71073 \text{ \AA}$ ). The data reduction was treated by using CrysAlisPro software.<sup>1,2</sup> The crystal structure was solved with the SHELXS-97/SHELXS-2014 program.<sup>3-5</sup> The H atoms of **C4**, **C5** and **C6** were refined at idealized positions riding on the C atoms, with isotropic displacement parameters  $U_{\text{iso}}(\text{H}) = 1.2U_{\text{eq}}(\text{C})$  and  $d(\text{C-H}) = 0.97 \text{ \AA}$ . The H atoms of the H<sub>2</sub>O molecules were refined at idealized positions riding on the O atoms, with isotropic displacement parameters  $U_{\text{iso}}(\text{H}) = 1.2U_{\text{eq}}(\text{O})$  and  $d(\text{O-H}) = 0.85 \text{ \AA}$ . In the [**C4**][**I13**]<sub>2</sub>, I1, I1A and I1B are disordered over three sites with occupancies 0.871:0.042:0.087. In the [**C4**][**I135**], I1 and I1A are disordered over two sites with occupancies 0.921:0.079. In the [**C5**][**I12**], C13~C16, O5 and C13'~C16', O5' are disordered over two sites with occupancies 0.648:0.352. In the [**C5**][**I14**], C1~C6, F1~F4, I1~I2 and C1A~C6A, F1A~F4A, I1A~I2A are disordered over two sites with occupancies 0.418:0.582, and C7~C12, F5~F8, I3~I4 and C7A~C12A, F5A~F8A, I3A~I4A are disordered over two sites with occupancies 0.687:0.313. In the [**C5**][**I135**]<sub>2</sub>, C1~C12,

F1~F6, I1~I6 and C1A~C12A, F1A~F6A, I1A~I6A are disordered over two sites with occupancies 0.535:0.465, and C1~C6, O2~O3 and C1A~C6A, O2A~O3A are disordered over two sites with occupancies 0.982:0.108. Crystallographic data of the thirteen cocrystals were listed in the next section. The CIF files of the thirteen cocrystals (CCDC deposition numbers: 2281927-2281938, 2379639) can be obtained free of charge via <http://www.ccdc.cam.ac.uk/conts/retrieving.html>. At the same time, the CIF files of the thirteen cocrystals were also provided as the electronic supplementary materials. The checkcif files for the thirteen cocrystal structures can be found in the Supplementary Materials.

### **S1.3. Computational details**

All the density functional theory (DFT) calculations were carried out at the PBE0-D3(BJ)/def2-TZVPP level of theory with the Gaussian 09 program.<sup>6-10</sup> Previous studies on the noncovalent interactions have shown that the PBE0-D3(BJ)/def2-TZVPP calculations can give comparable results with the “golden standard” coupled cluster calculations.<sup>11,12</sup> It is well known that the accuracy of the DFT calculations also depends on the number of points used in the numerical integration. An “ultrafine” integration grid (99 radial, 590 angular points) was used for all the DFT calculations to avoid the possible integration grid errors.

To further confirm the existence of the motifs **M1**, **M2**, **M3** and **M4**, the “atoms in molecules” (AIM) analysis has been performed with the PBE0-D3(BJ)/def2-TZVPP electron density.<sup>13</sup> The AIM2000 software was employed to carry out the AIM analysis.<sup>14</sup>

**S2. The crystallographic data and structure refinement parameters for the thirteen cocrystals.**

| Cocrystal                                                                            | [C4][I12] <sub>2</sub>                                                       | [C4][I13] <sub>2</sub>                                                      | [C4][I14] <sub>2</sub>                                                      |
|--------------------------------------------------------------------------------------|------------------------------------------------------------------------------|-----------------------------------------------------------------------------|-----------------------------------------------------------------------------|
| CCDC No.                                                                             | 2281927                                                                      | 2281935                                                                     | 2281928                                                                     |
| Empirical formula                                                                    | C <sub>20</sub> H <sub>16</sub> F <sub>8</sub> I <sub>4</sub> O <sub>4</sub> | C <sub>10</sub> H <sub>8</sub> F <sub>4</sub> I <sub>2</sub> O <sub>2</sub> | C <sub>10</sub> H <sub>8</sub> F <sub>4</sub> I <sub>2</sub> O <sub>2</sub> |
| Formula weight                                                                       | 979.93                                                                       | 489.96                                                                      | 489.96                                                                      |
| Crystal size/mm <sup>3</sup>                                                         | 0.30 × 0.30 × 0.10                                                           | 0.18 × 0.15 × 0.14                                                          | 0.18 × 0.15 × 0.11                                                          |
| Crystal system                                                                       | triclinic                                                                    | monoclinic                                                                  | monoclinic                                                                  |
| Space group                                                                          | <i>P</i> -1                                                                  | <i>P</i> 2 <sub>1</sub> / <i>c</i>                                          | <i>P</i> 2 <sub>1</sub>                                                     |
| <i>a</i> /Å                                                                          | 8.1008(7)                                                                    | 12.0376(4)                                                                  | 7.5395(6)                                                                   |
| <i>b</i> /Å                                                                          | 8.2512(6)                                                                    | 15.4508(8)                                                                  | 8.6077(7)                                                                   |
| <i>c</i> /Å                                                                          | 10.7542(8)                                                                   | 7.5142(3)                                                                   | 12.2413(10)                                                                 |
| $\alpha$ /°                                                                          | 76.846(6)                                                                    | 90                                                                          | 94.007(7)                                                                   |
| $\beta$ /°                                                                           | 78.005(7)                                                                    | 95.120(3)                                                                   | 103.778(7)                                                                  |
| $\gamma$ /°                                                                          | 89.406(6)                                                                    | 90                                                                          | 113.576(7)                                                                  |
| <i>V</i> /Å <sup>3</sup>                                                             | 684.17(9)                                                                    | 1391.99(10)                                                                 | 694.90(10)                                                                  |
| <i>Z</i>                                                                             | 1                                                                            | 4                                                                           | 2                                                                           |
| $\rho_{\text{calc}}$ /g·cm <sup>-3</sup>                                             | 2.378                                                                        | 2.338                                                                       | 2.342                                                                       |
| <i>T</i> /K                                                                          | 295(2)                                                                       | 293(2)                                                                      | 293(2)                                                                      |
| 2 $\theta$ range for data collection/°                                               | 5.800–50.980                                                                 | 6.796–56.608                                                                | 7.440–52.494                                                                |
| Reflections collected                                                                | 4527                                                                         | 8105                                                                        | 5112                                                                        |
| Independent reflections [ <i>R</i> <sub>int</sub> ]                                  | 2524 [0.0258]                                                                | 2945 [0.0561]                                                               | 2833 [0.0317]                                                               |
| <i>R</i> <sub>1</sub> , <i>wR</i> <sub>2</sub> ( <i>I</i> > 2 $\sigma$ ( <i>I</i> )) | 0.0377, 0.0685                                                               | 0.0439, 0.0858                                                              | 0.0410, 0.0819                                                              |
| <i>R</i> <sub>1</sub> , <i>wR</i> <sub>2</sub> (all data)                            | 0.0534, 0.0776                                                               | 0.0615, 0.0949                                                              | 0.0609, 0.0966                                                              |
| Goodness-of-fit on <i>F</i> <sup>2</sup>                                             | 1.042                                                                        | 1.060                                                                       | 1.056                                                                       |

| Cocrystal                                                                            | [C4][I135]                                                                   | [C5][I12]                                                                    | [C5][W]2[I13]                                                                |
|--------------------------------------------------------------------------------------|------------------------------------------------------------------------------|------------------------------------------------------------------------------|------------------------------------------------------------------------------|
| CCDC No.                                                                             | 2281934                                                                      | 2281931                                                                      | 2281938                                                                      |
| Empirical formula                                                                    | C <sub>14</sub> H <sub>16</sub> F <sub>3</sub> I <sub>3</sub> O <sub>4</sub> | C <sub>16</sub> H <sub>20</sub> F <sub>4</sub> I <sub>2</sub> O <sub>5</sub> | C <sub>16</sub> H <sub>24</sub> F <sub>4</sub> I <sub>2</sub> O <sub>7</sub> |
| Formula weight                                                                       | 685.97                                                                       | 622.12                                                                       | 658.15                                                                       |
| Crystal size/mm <sup>3</sup>                                                         | 0.23 × 0.17 × 0.16                                                           | 0.40 × 0.30 × 0.10                                                           | 0.45 × 0.35 × 0.29                                                           |
| Crystal system                                                                       | monoclinic                                                                   | monoclinic                                                                   | monoclinic                                                                   |
| Space group                                                                          | <i>P</i> 2 <sub>1</sub> / <i>m</i>                                           | <i>P</i> 2 <sub>1</sub> / <i>c</i>                                           | <i>P</i> 2 <sub>1</sub> / <i>c</i>                                           |
| <i>a</i> /Å                                                                          | 4.6368(5)                                                                    | 12.3775(18)                                                                  | 7.4810(5)                                                                    |
| <i>b</i> /Å                                                                          | 29.139(4)                                                                    | 7.6176(10)                                                                   | 22.1452(19)                                                                  |
| <i>c</i> /Å                                                                          | 7.3508(6)                                                                    | 22.623(3)                                                                    | 14.6860(11)                                                                  |
| $\alpha$ /°                                                                          | 90                                                                           | 90                                                                           | 90                                                                           |
| $\beta$ /°                                                                           | 97.411(9)                                                                    | 100.287(13)                                                                  | 103.285(7)                                                                   |
| $\gamma$ /°                                                                          | 90                                                                           | 90                                                                           | 90                                                                           |
| <i>V</i> /Å <sup>3</sup>                                                             | 984.9(2)                                                                     | 2098.8(5)                                                                    | 2367.9(3)                                                                    |
| <i>Z</i>                                                                             | 2                                                                            | 4                                                                            | 4                                                                            |
| $\rho_{\text{calc}}$ /g·cm <sup>-3</sup>                                             | 2.313                                                                        | 1.969                                                                        | 1.846                                                                        |
| <i>T</i> /K                                                                          | 293(2)                                                                       | 295(2)                                                                       | 293(2)                                                                       |
| 2 $\theta$ range for data collection/°                                               | 6.988–58.632                                                                 | 6.300–51.000                                                                 | 6.698–51.000                                                                 |
| Reflections collected                                                                | 4437                                                                         | 8868                                                                         | 12945                                                                        |
| Independent reflections [ <i>R</i> <sub>int</sub> ]                                  | 2308 [0.0335]                                                                | 3884 [0.1102]                                                                | 4376 [0.0468]                                                                |
| <i>R</i> <sub>1</sub> , <i>wR</i> <sub>2</sub> ( <i>I</i> > 2 $\sigma$ ( <i>I</i> )) | 0.0531, 0.0957                                                               | 0.0878, 0.2460                                                               | 0.0594, 0.1128                                                               |
| <i>R</i> <sub>1</sub> , <i>wR</i> <sub>2</sub> (all data)                            | 0.0800, 0.1101                                                               | 0.1262, 0.3317                                                               | 0.0865, 0.1279                                                               |
| Goodness-of-fit on <i>F</i> <sup>2</sup>                                             | 1.078                                                                        | 1.128                                                                        | 1.024                                                                        |

| Cocrystal                                                                            | [C5][I14]                                                                     | [C5][I135] <sub>2</sub>                                                      | [C6][W] <sub>4</sub> [I12] <sub>2</sub>                                       |
|--------------------------------------------------------------------------------------|-------------------------------------------------------------------------------|------------------------------------------------------------------------------|-------------------------------------------------------------------------------|
| CCDC No.                                                                             | 2281933                                                                       | 2281936                                                                      | 2281929                                                                       |
| Empirical formula                                                                    | C <sub>32</sub> H <sub>40</sub> F <sub>8</sub> I <sub>4</sub> O <sub>10</sub> | C <sub>22</sub> H <sub>19</sub> F <sub>6</sub> I <sub>6</sub> O <sub>5</sub> | C <sub>24</sub> H <sub>32</sub> F <sub>8</sub> I <sub>4</sub> O <sub>10</sub> |
| Formula weight                                                                       | 1244.24                                                                       | 1238.77                                                                      | 1140.10                                                                       |
| Crystal size/mm <sup>3</sup>                                                         | 0.21 × 0.17 × 0.12                                                            | 0.33 × 0.27 × 0.25                                                           | 0.40 × 0.40 × 0.20                                                            |
| Crystal system                                                                       | triclinic                                                                     | monoclinic                                                                   | triclinic                                                                     |
| Space group                                                                          | <i>P</i> -1                                                                   | <i>Cc</i>                                                                    | <i>P</i> -1                                                                   |
| <i>a</i> /Å                                                                          | 9.7355(6)                                                                     | 16.1779(9)                                                                   | 7.6327(5)                                                                     |
| <i>b</i> /Å                                                                          | 12.4217(7)                                                                    | 8.4631(4)                                                                    | 8.0627(6)                                                                     |
| <i>c</i> /Å                                                                          | 18.1787(11)                                                                   | 25.3518(15)                                                                  | 15.0373(12)                                                                   |
| $\alpha$ /°                                                                          | 88.582(5)                                                                     | 90                                                                           | 88.107(6)                                                                     |
| $\beta$ /°                                                                           | 80.631(5)                                                                     | 105.819(6)                                                                   | 77.223(6)                                                                     |
| $\gamma$ /°                                                                          | 78.136(5)                                                                     | 90                                                                           | 89.966(6)                                                                     |
| <i>V</i> /Å <sup>3</sup>                                                             | 2122.6(2)                                                                     | 3339.6(3)                                                                    | 901.97(12)                                                                    |
| <i>Z</i>                                                                             | 2                                                                             | 4                                                                            | 1                                                                             |
| $\rho_{\text{calc}}$ /g·cm <sup>-3</sup>                                             | 1.947                                                                         | 2.464                                                                        | 2.099                                                                         |
| <i>T</i> /K                                                                          | 296(2)                                                                        | 295(2)                                                                       | 295(2)                                                                        |
| 2 $\theta$ range for data collection/°                                               | 6.992–52.208                                                                  | 6.682–49.994                                                                 | 6.660–51.000                                                                  |
| Reflections collected                                                                | 17211                                                                         | 9499                                                                         | 5889                                                                          |
| Independent reflections [ <i>R</i> <sub>int</sub> ]                                  | 7872 [0.0383]                                                                 | 5483 [0.0272]                                                                | 3348 [0.0312]                                                                 |
| <i>R</i> <sub>1</sub> , <i>wR</i> <sub>2</sub> ( <i>I</i> > 2 $\sigma$ ( <i>I</i> )) | 0.0607, 0.1542                                                                | 0.0388, 0.0902                                                               | 0.0419, 0.0885                                                                |
| <i>R</i> <sub>1</sub> , <i>wR</i> <sub>2</sub> (all data)                            | 0.0930, 0.1778                                                                | 0.0432, 0.0949                                                               | 0.0601, 0.0957                                                                |
| Goodness-of-fit on <i>F</i> <sup>2</sup>                                             | 1.033                                                                         | 1.050                                                                        | 1.110                                                                         |

| Cocrystal                                                                            | [C6][I13] <sub>2</sub>                                                       | [C6][W] <sub>3</sub> [I14]                                                   | [C6][I14]                                                                    | [C6][I135] <sub>2</sub>                                                      |
|--------------------------------------------------------------------------------------|------------------------------------------------------------------------------|------------------------------------------------------------------------------|------------------------------------------------------------------------------|------------------------------------------------------------------------------|
| CCDC No.                                                                             | 2281932                                                                      | 2281930                                                                      | 2379639                                                                      | 2281937                                                                      |
| Empirical formula                                                                    | C <sub>12</sub> H <sub>12</sub> F <sub>4</sub> I <sub>2</sub> O <sub>3</sub> | C <sub>18</sub> H <sub>30</sub> F <sub>4</sub> I <sub>2</sub> O <sub>9</sub> | C <sub>18</sub> H <sub>24</sub> F <sub>4</sub> I <sub>2</sub> O <sub>6</sub> | C <sub>24</sub> H <sub>24</sub> F <sub>6</sub> I <sub>6</sub> O <sub>6</sub> |
| Formula weight                                                                       | 534.02                                                                       | 720.22                                                                       | 666.17                                                                       | 1283.87                                                                      |
| Crystal size/mm <sup>3</sup>                                                         | 0.41 × 0.35 ×<br>0.24                                                        | 0.23 × 0.15 ×<br>0.11                                                        | 0.35 × 0.30 ×<br>0.21                                                        | 0.35 × 0.29 ×<br>0.21                                                        |
| Crystal system                                                                       | orthorhombic                                                                 | triclinic                                                                    | monoclinic                                                                   | monoclinic                                                                   |
| Space group                                                                          | <i>Pbca</i>                                                                  | <i>P</i> -1                                                                  | <i>I</i> 2/ <i>a</i>                                                         | <i>P</i> 2 <sub>1</sub> / <i>c</i>                                           |
| <i>a</i> /Å                                                                          | 7.8540(6)                                                                    | 7.5332(5)                                                                    | 14.2455(5)                                                                   | 8.5263(6)                                                                    |
| <i>b</i> /Å                                                                          | 15.3678(14)                                                                  | 13.1800(8)                                                                   | 10.6548(5)                                                                   | 25.6556(16)                                                                  |
| <i>c</i> /Å                                                                          | 27.2763(16)                                                                  | 14.1357(8)                                                                   | 15.5033(5)                                                                   | 8.8944(5)                                                                    |
| $\alpha$ /°                                                                          | 90                                                                           | 105.855(5)                                                                   | 90                                                                           | 90                                                                           |
| $\beta$ /°                                                                           | 90                                                                           | 91.408(5)                                                                    | 94.012(3)                                                                    | 115.244(8)                                                                   |
| $\gamma$ /°                                                                          | 90                                                                           | 103.061(5)                                                                   | 90                                                                           | 90                                                                           |
| <i>V</i> /Å <sup>3</sup>                                                             | 3292.2(4)                                                                    | 1309.58(14)                                                                  | 2347.37(16)                                                                  | 1759.8(2)                                                                    |
| <i>Z</i>                                                                             | 8                                                                            | 2                                                                            | 4                                                                            | 2                                                                            |
| $\rho_{\text{calc}}$ /g·cm <sup>-3</sup>                                             | 2.155                                                                        | 1.826                                                                        | 1.885                                                                        | 2.423                                                                        |
| <i>T</i> /K                                                                          | 293(2)                                                                       | 295(2)                                                                       | 296(2)                                                                       | 293(2)                                                                       |
| 2 $\theta$ range for data collection/°                                               | 6.940–51.000                                                                 | 6.520–144.720                                                                | 6.964–58.464                                                                 | 6.380–51.000                                                                 |
| Reflections collected                                                                | 9490                                                                         | 9667                                                                         | 12761                                                                        | 8707                                                                         |
| Independent reflections<br>[ <i>R</i> <sub>int</sub> ]                               | 3056 [0.0343]                                                                | 5033 [0.0511]                                                                | 2841 [0.0321]                                                                | 3266 [0.0435]                                                                |
| <i>R</i> <sub>1</sub> , <i>wR</i> <sub>2</sub> ( <i>I</i> > 2 $\sigma$ ( <i>I</i> )) | 0.0490, 0.0987                                                               | 0.0572, 0.1499                                                               | 0.0268, 0.0524                                                               | 0.0629, 0.1510                                                               |
| <i>R</i> <sub>1</sub> , <i>wR</i> <sub>2</sub> (all data)                            | 0.0665, 0.1059                                                               | 0.0677, 0.1642                                                               | 0.0317, 0.0544                                                               | 0.0815, 0.1642                                                               |
| Goodness-of-fit on <i>F</i> <sup>2</sup>                                             | 1.133                                                                        | 1.026                                                                        | 1.059                                                                        | 1.078                                                                        |



**S3. The I...O distance (Å), ratio of the I...O distance to the sum of the van der Waals radii of I and O, and C-I...O angle (°) for the thirteen cocrystals.**

| Cocrystal                                   | I...O distance      | Ratio | C-I...O angle |
|---------------------------------------------|---------------------|-------|---------------|
| <b>[C4][I12]<sub>2</sub></b>                | <b>M1:</b> 3.013(4) | 0.86  | 171.5(2)      |
|                                             | <b>M1:</b> 3.130(4) | 0.89  | 159.0(2)      |
| <b>[C4][I13]<sub>2</sub></b>                | <b>M1:</b> 2.992(5) | 0.85  | 169.2(2)      |
|                                             | <b>M1:</b> 3.001(5) | 0.86  | 169.2(2)      |
| <b>[C4][I14]<sub>2</sub></b>                | <b>M1:</b> 2.987(4) | 0.85  | 167.8(2)      |
|                                             | <b>M1:</b> 3.001(4) | 0.86  | 172.6(2)      |
| <b>[C4][I135]</b>                           | <b>M1:</b> 2.926(6) | 0.84  | 175.2(3)      |
| <b>[C5][I12]</b>                            | <b>M1:</b> 2.909(9) | 0.83  | 172.0(4)      |
|                                             | <b>M1:</b> 2.918(1) | 0.83  | 178.9(4)      |
| <b>[C5][W]<sub>2</sub>[I13]</b>             | <b>M4:</b> 2.843(6) | 0.81  | 176.0(3)      |
|                                             | <b>M4:</b> 2.885(7) | 0.82  | 174.9(3)      |
| <b>[C5][I14]</b>                            | <b>M1:</b> 2.955(7) | 0.84  | 171.2(3)      |
|                                             | <b>M1:</b> 3.036(1) | 0.87  | 168.2(3)      |
|                                             | <b>M2:</b> 3.188(7) | 0.91  | 158.1(3)      |
|                                             | <b>M2:</b> 3.308(7) | 0.95  | 150.8(3)      |
|                                             | <b>M3:</b> 2.919(7) | 0.83  | 175.0(3)      |
| <b>[C5][I135]<sub>2</sub></b>               | <b>M1:</b> 2.878(1) | 0.82  | 175.7(4)      |
|                                             | <b>M1:</b> 3.024(2) | 0.86  | 175.8(4)      |
|                                             | <b>M3:</b> 3.127(1) | 0.89  | 170.3(4)      |
| <b>[C6][W]<sub>4</sub>[I12]<sub>2</sub></b> | <b>M4:</b> 2.897(4) | 0.83  | 174.0(2)      |
|                                             | <b>M4:</b> 3.266(5) | 0.93  | 154.1(2)      |
| <b>[C6][I13]<sub>2</sub></b>                | <b>M1:</b> 2.940(4) | 0.84  | 173.0(2)      |
|                                             | <b>M1:</b> 3.141(4) | 0.90  | 174.5(2)      |
| <b>[C6][I14]</b>                            | <b>M1:</b> 3.062(2) | 0.87  | 169.3(7)      |
| <b>[C6][W]<sub>3</sub>[I14]</b>             | <b>M1:</b> 2.964(6) | 0.85  | 177.4(2)      |
|                                             | <b>M4:</b> 2.897(5) | 0.83  | 176.9(2)      |
| <b>[C6][I135]<sub>2</sub></b>               | <b>M1:</b> 3.000(7) | 0.85  | 175.2(3)      |
|                                             | <b>M3:</b> 3.003(7) | 0.86  | 168.5(3)      |

S4. The unit cells for the thirteen cocrystals. Color code: H, white; C, gray; O, red; F, yellow green; I, purple.

$[C4][I12]_2$

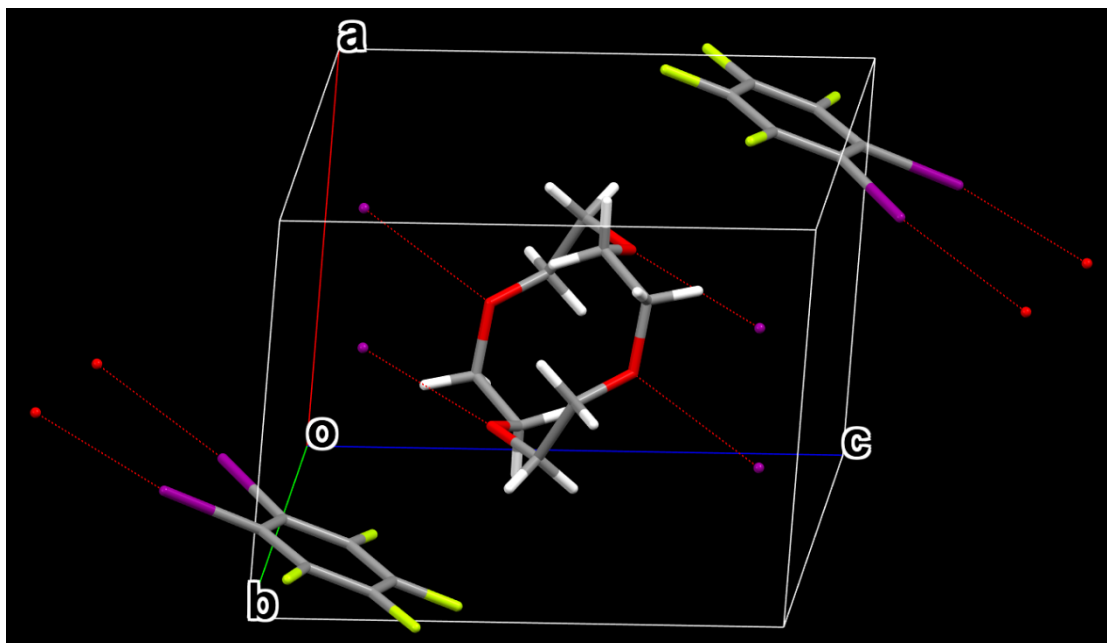

$[C4][I13]_2$

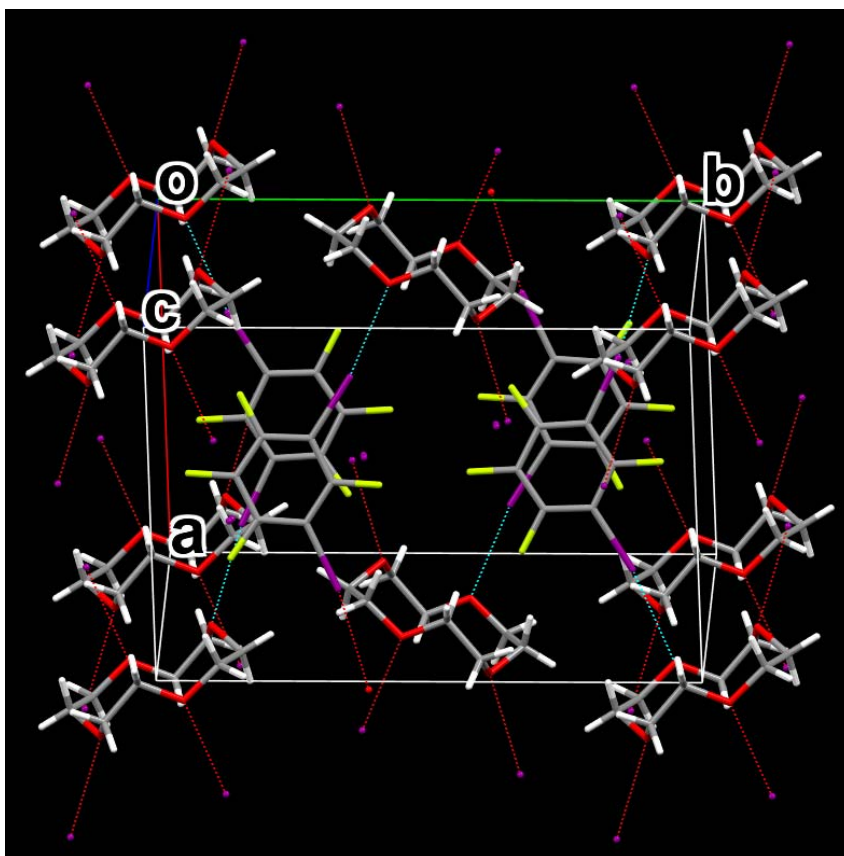

[C4][I14]<sub>2</sub>

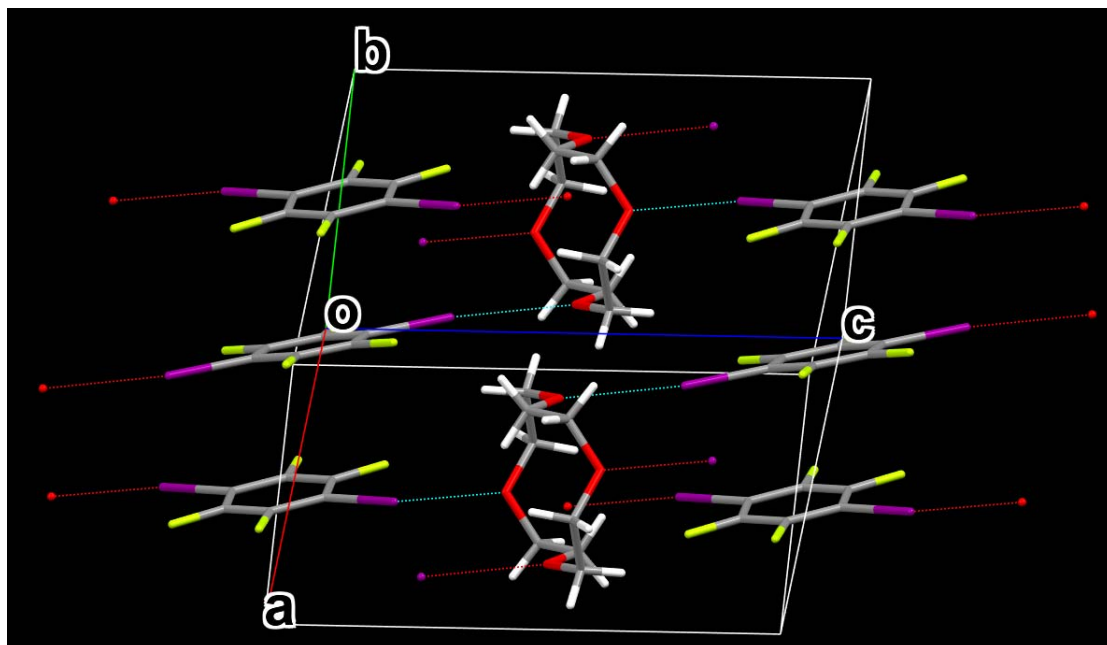

[C4][I135]

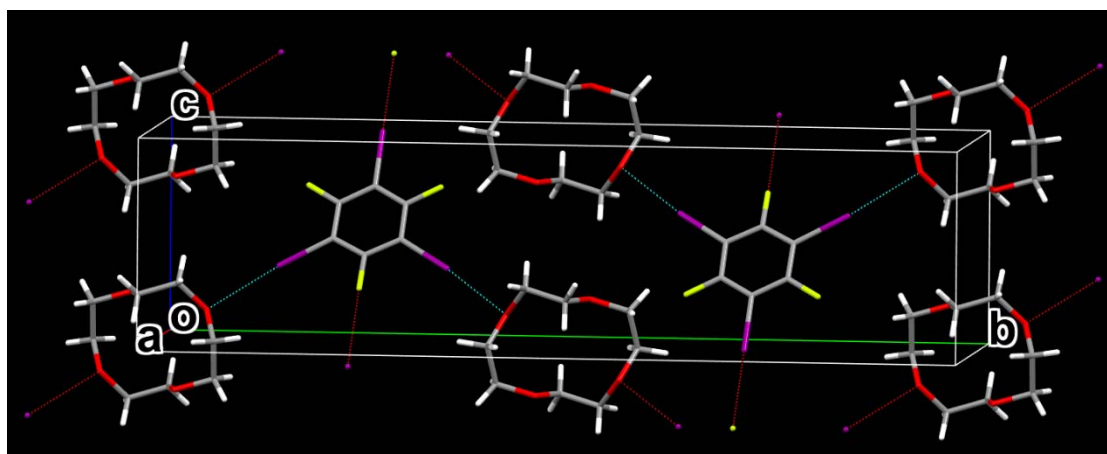

[C5][I12]

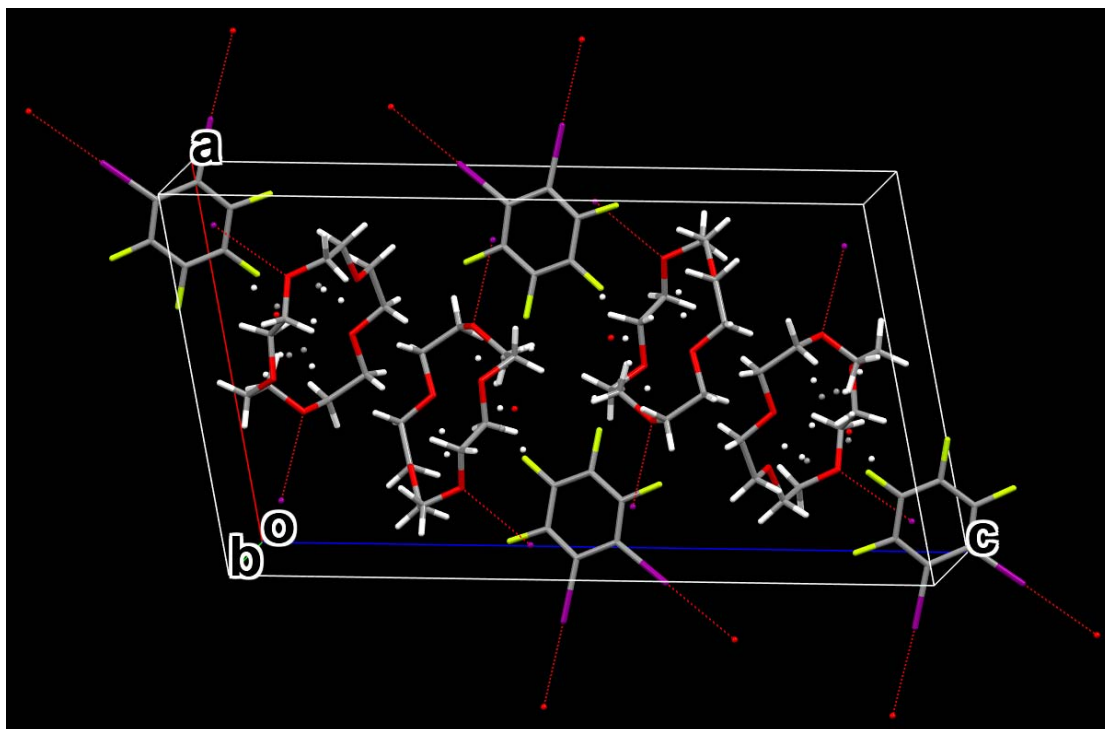

[C5][W]<sub>2</sub>[I13]

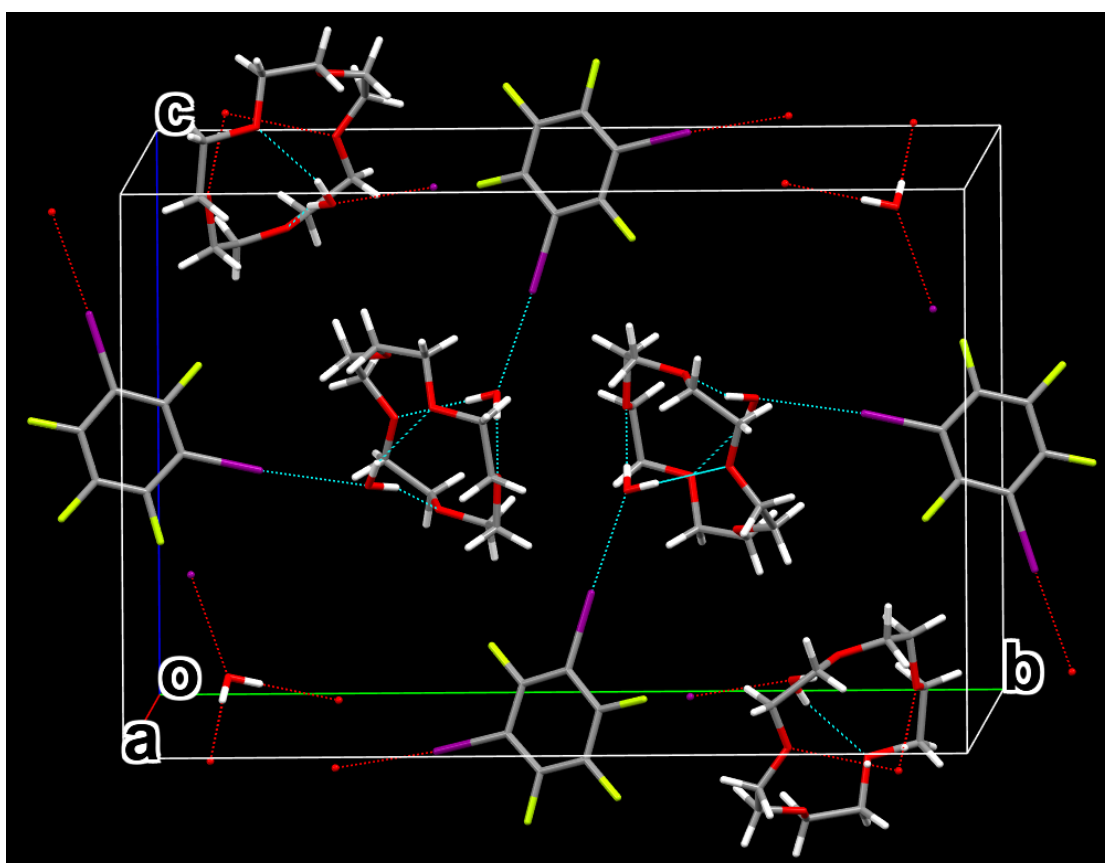

[C5][I14]

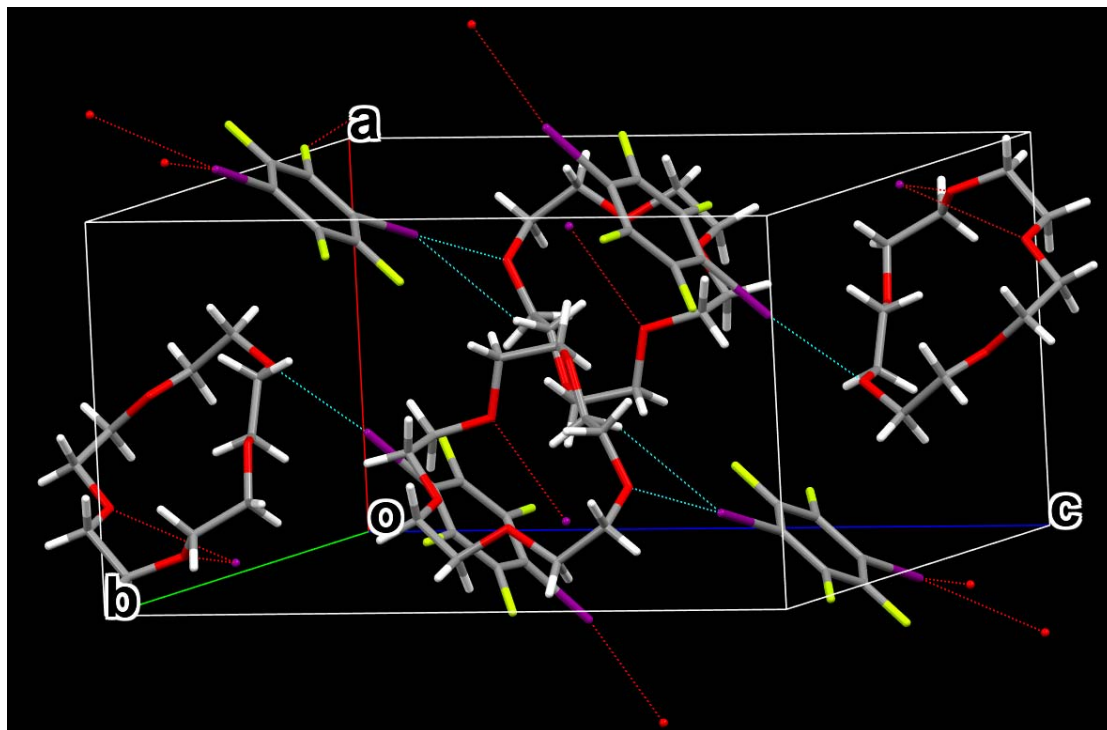

[C5][I135]<sub>2</sub>

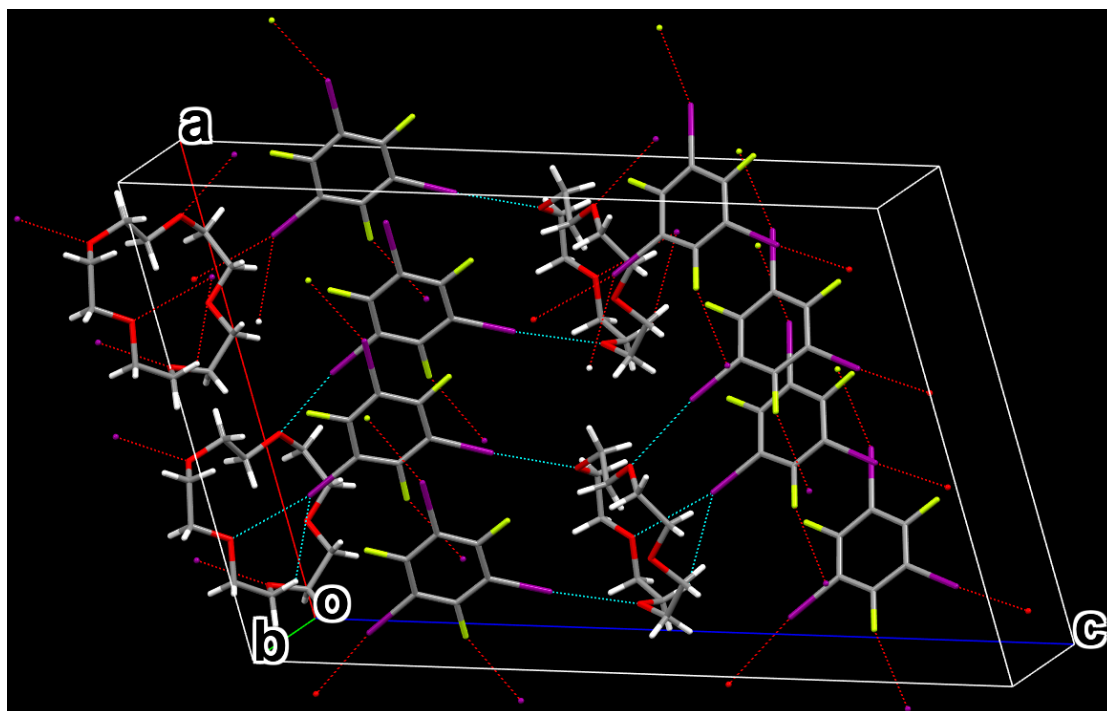

[C6][W]4[I12]2

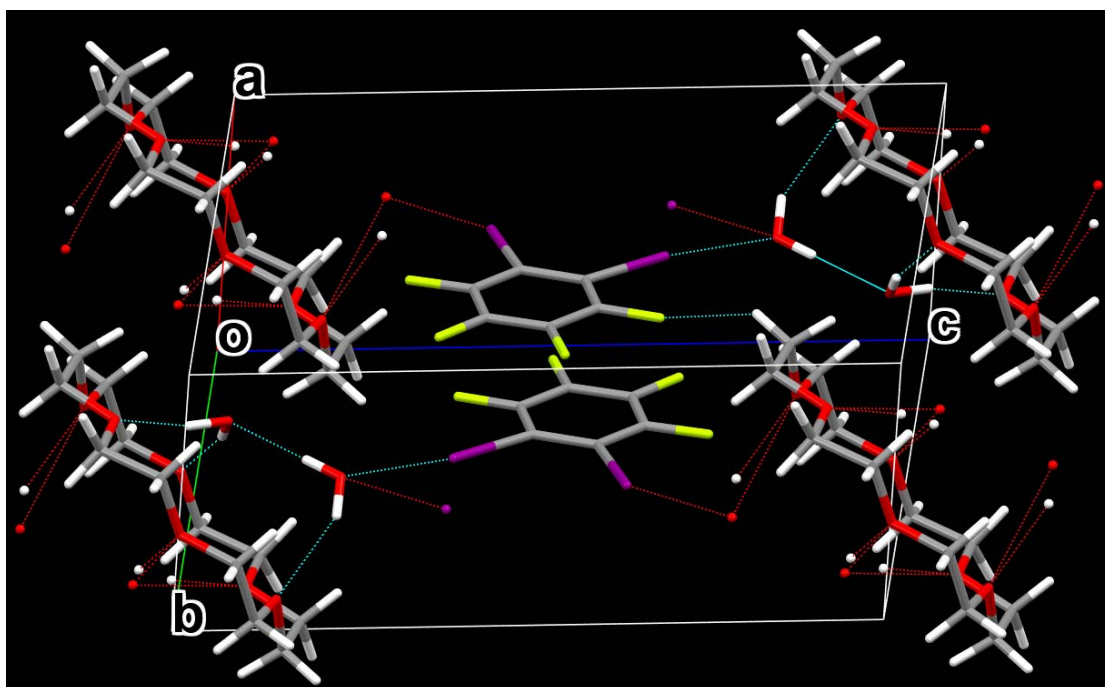

[C6][I13]2

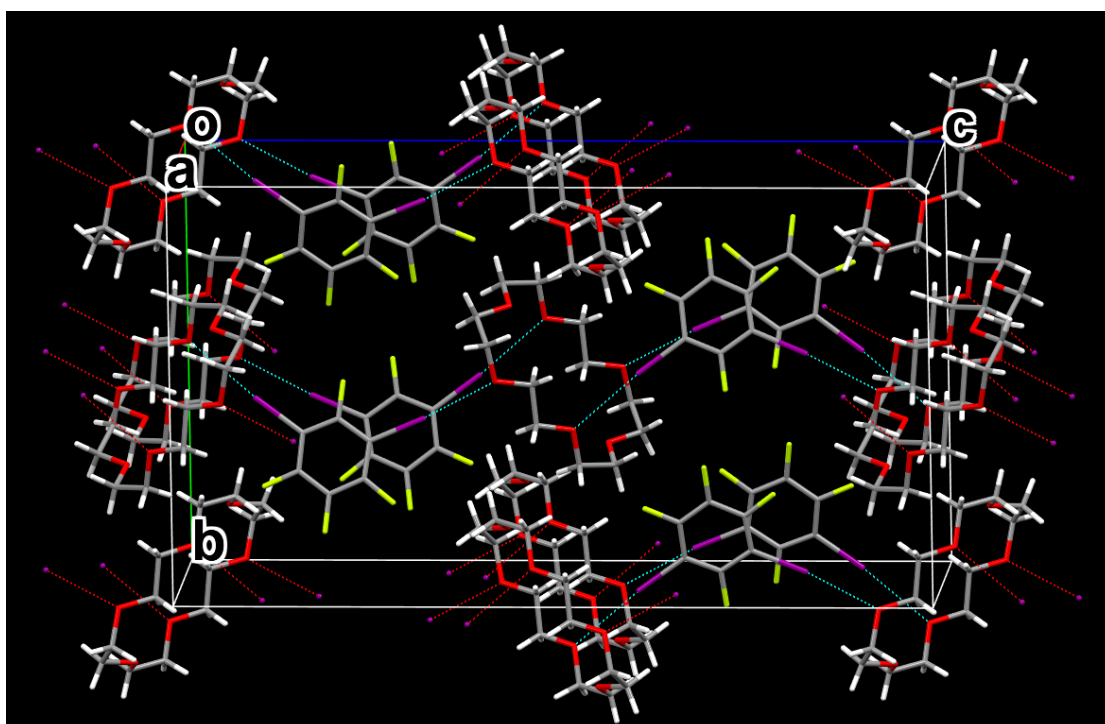

[C6][114]

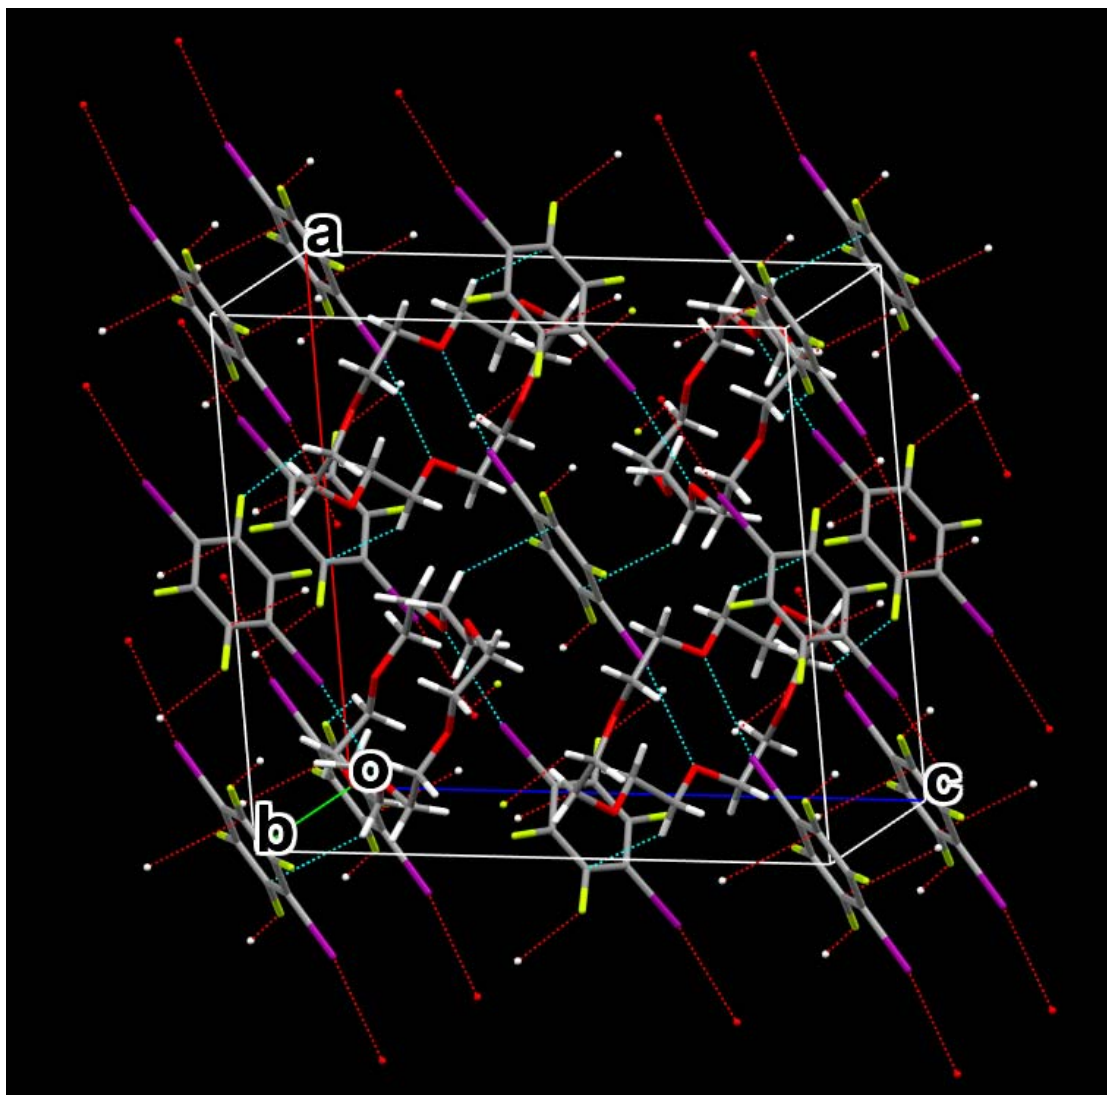

[C6][W]<sub>3</sub>[I14]

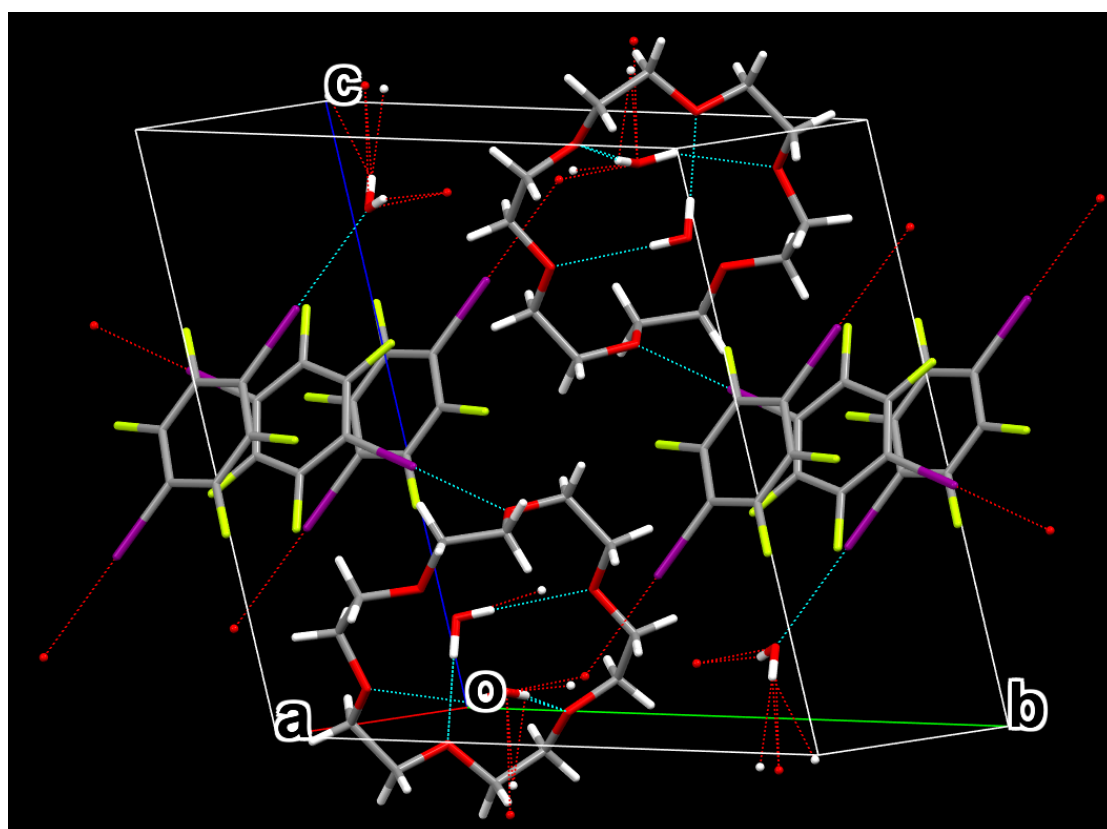

[C6][I135]<sub>2</sub>

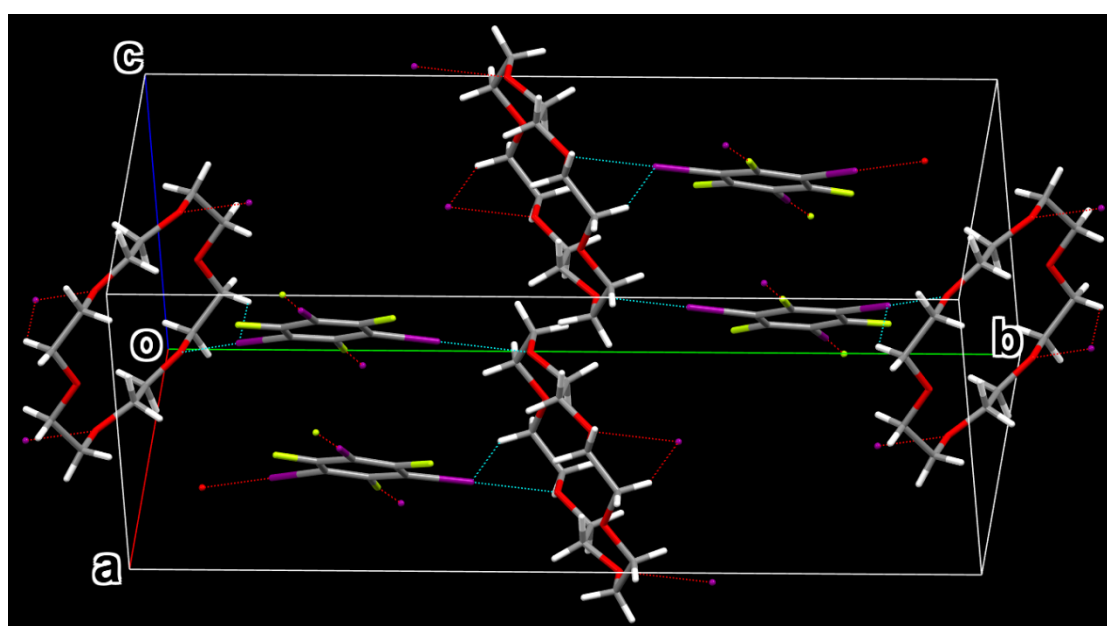



S5. The bond paths and bond critical points (small red dots) for the dimers in Fig. 4. For clarity, the ring critical points and cage critical points are omitted. The red numbers are the values of the electron density Laplacians (au).

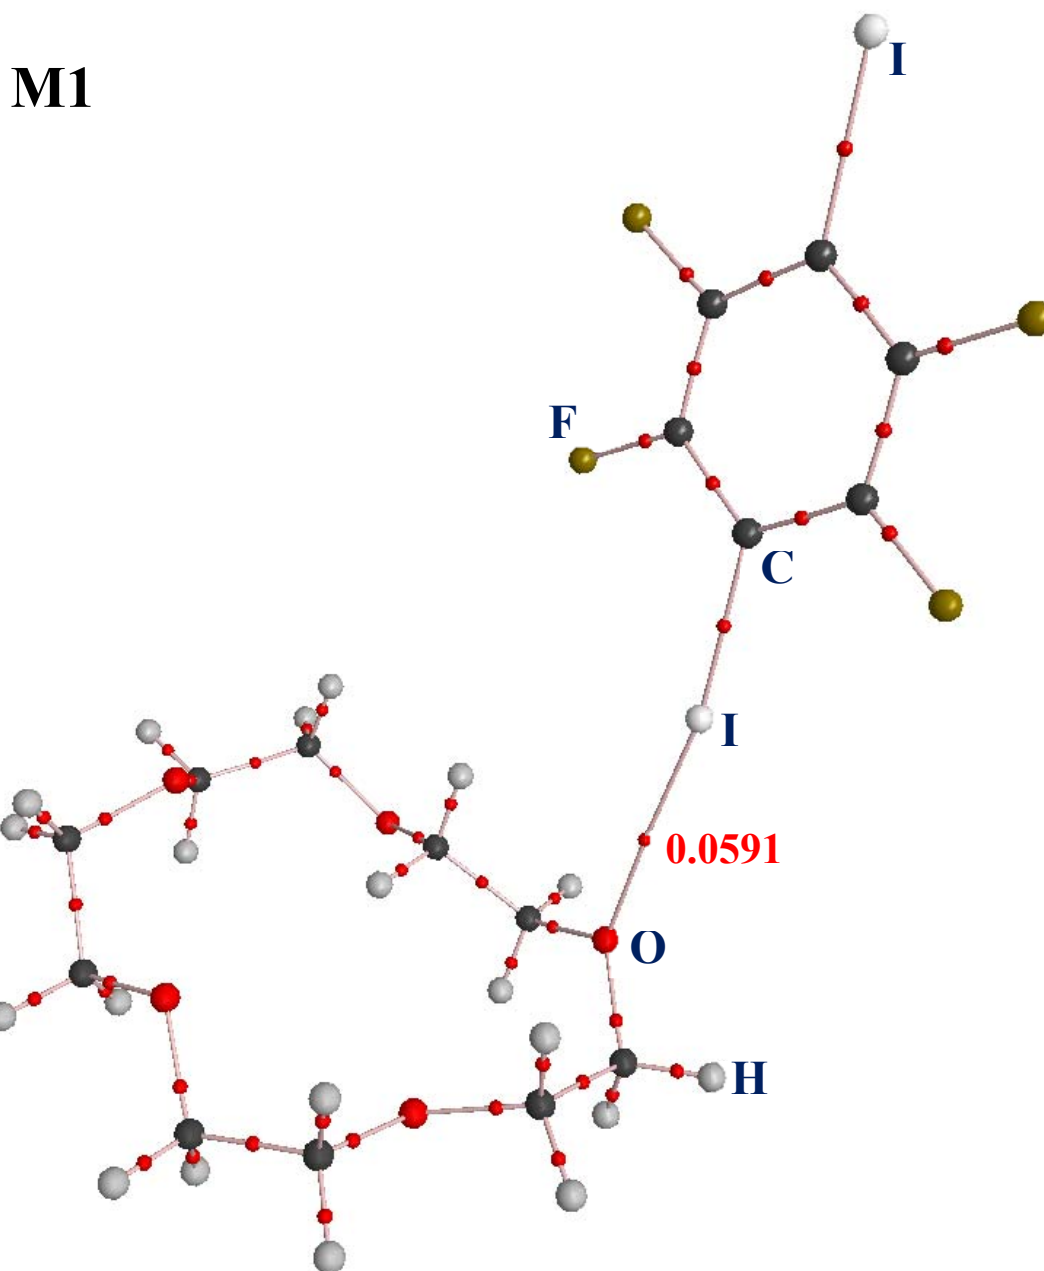

**M2**

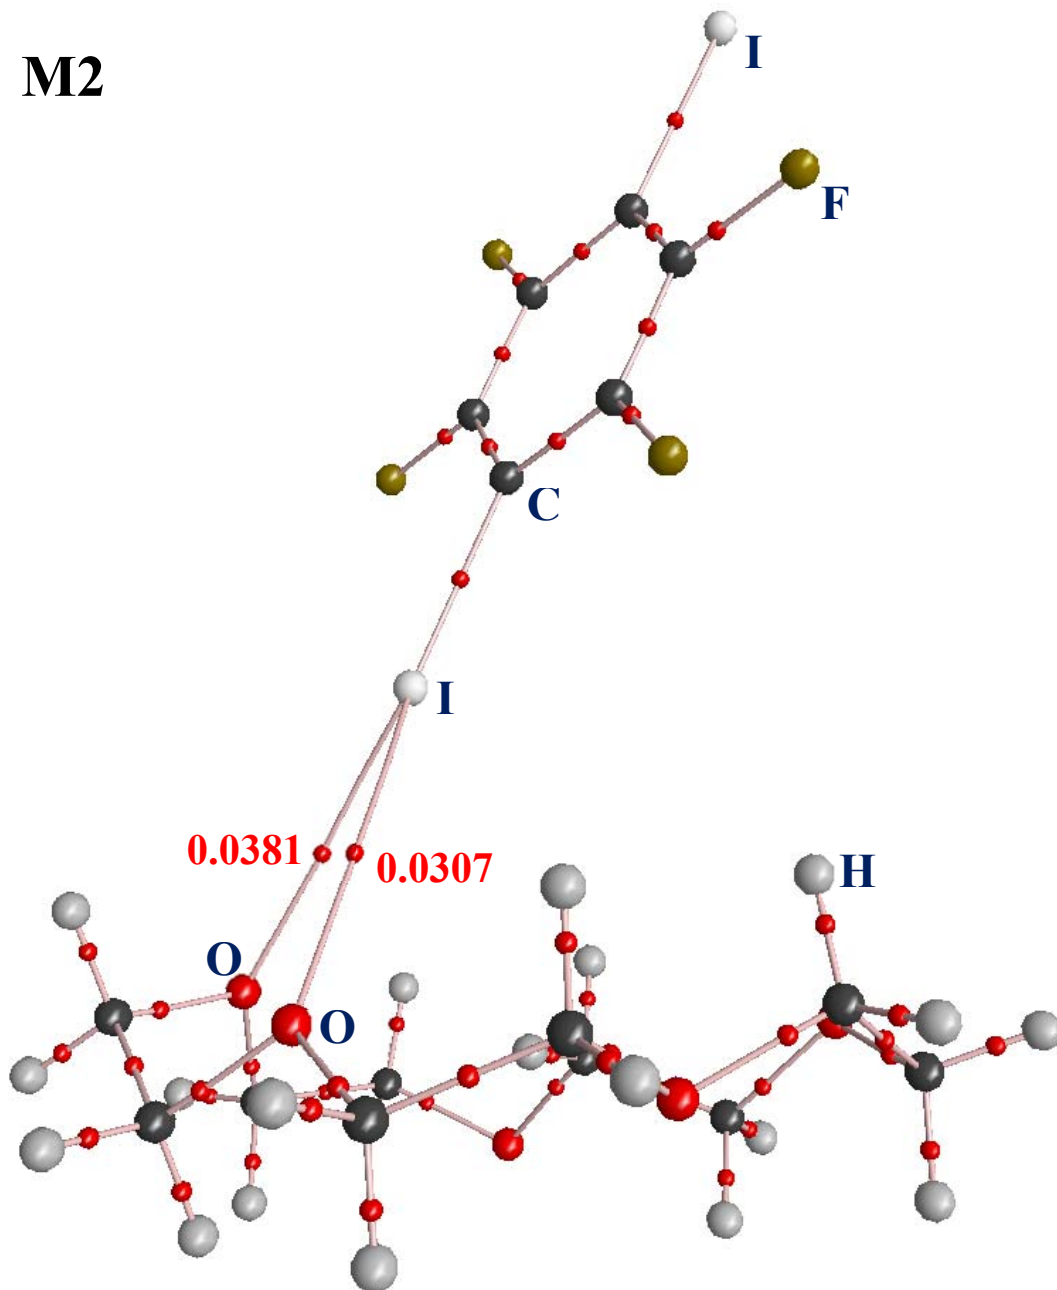

M3

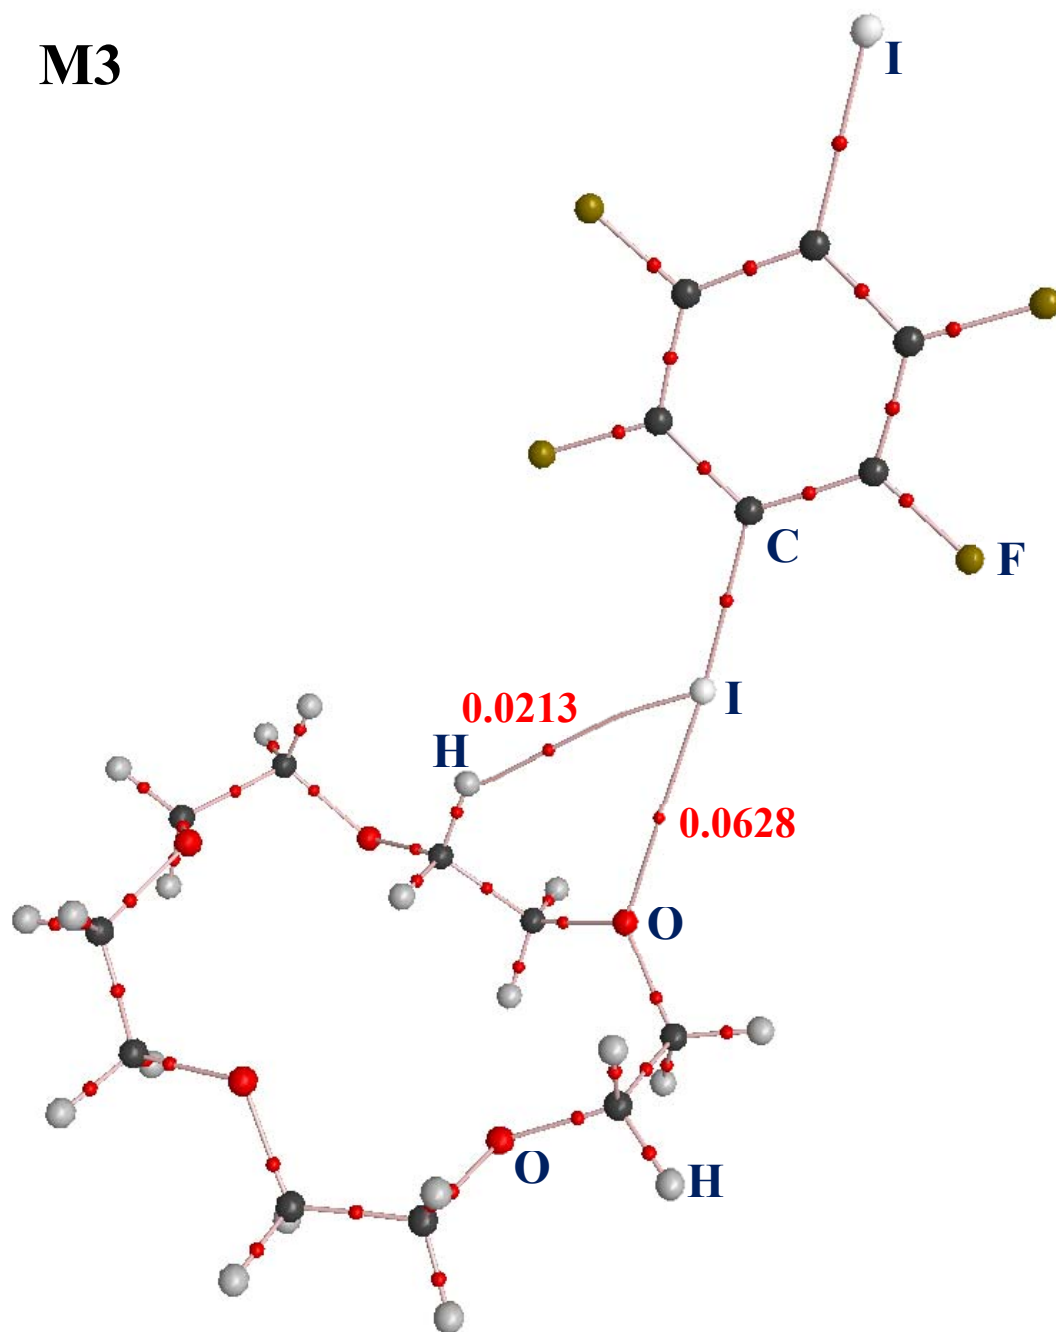

**M4**

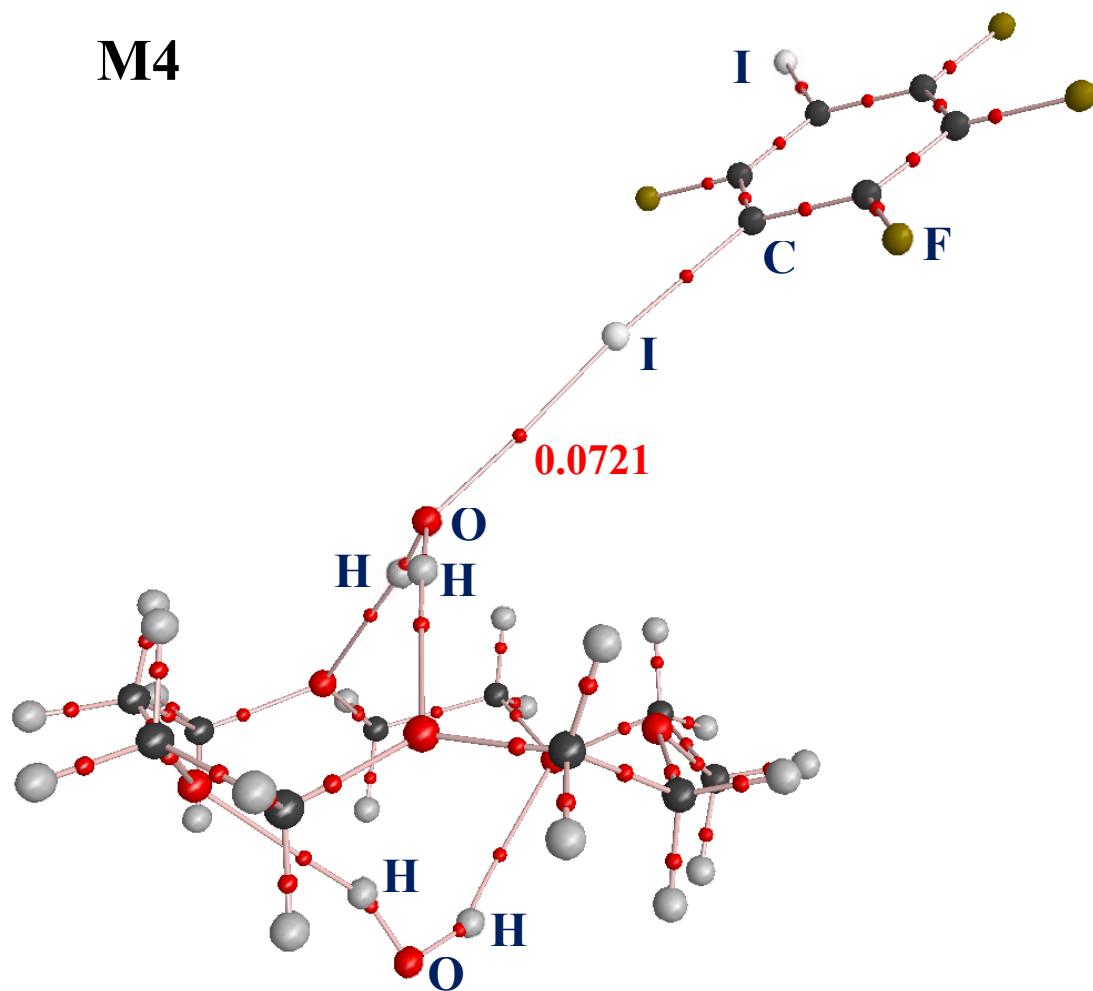

## S6. Notes and references

- 1 CrysAlisPro, Rigaku Oxford Diffraction, Version 1.171.36.32, England, 2013.
- 2 CrysAlisPro, Rigaku Oxford Diffraction, Version 1.171.38.41r, England, 2015.
- 3 G. M. Sheldrick, *SHELXS-97: Program for X-ray Crystal Structure Solution*, University of Gottingen: Gottingen, Germany, 1997.
- 4 G. M. Sheldrick, *SHELXS-97: Program for X-ray Crystal Structure Refinement*, University of Gottingen: Gottingen, Germany, 1997.
- 5 G. M. Sheldrick, *Acta Cryst.*, 2008, **A64**, 112–122.
- 6 C. Adamo and V. Barone, *J. Chem. Phys.*, 1999, **110**, 6158–6169.
- 7 S. Grimme, J. Antony, S. Ehrlich and H. Krieg, *J. Chem. Phys.*, 2010, **132**, 154104.
- 8 S. Grimme, S. Ehrlich and L. Goerigk, *J. Comput. Chem.*, 2011, **32**, 1456–1465.
- 9 F. Weigend and R. Ahlrichs, *Phys. Chem. Chem. Phys.*, 2005, **7**, 3297–3305.
- 10 Gaussian 09, Revision D.01, M. J. Frisch, G. W. Trucks, H. B. Schlegel, G. E. Scuseria, M. A. Robb, J. R. Cheeseman, G. Scalmani, V. Barone, B. Mennucci, G. A. Petersson, H. Nakatsuji, M. Caricato, X. Li, H. P. Hratchian, A. F. Izmaylov, J. Bloino, G. Zheng, J. L. Sonnenberg, M. Hada, M. Ehara, K. Toyota, R. Fukuda, J. Hasegawa, M. Ishida, T. Nakajima, Y. Honda, O. Kitao, H. Nakai, T. Vreven, J. A. Montgomery, Jr., J. E. Peralta, F. Ogliaro, M. Bearpark, J. J. Heyd, E. Brothers, K. N. Kudin, V. N. Staroverov, T. Keith, R. Kobayashi, J. Normand, K. Raghavachari, A. Rendell, J. C. Burant, S. S. Iyengar, J. Tomasi, M. Cossi, N. Rega, J. M. Millam, M. Klene, J. E. Knox, J. B. Cross, V. Bakken, C. Adamo, J. Jaramillo, R. Gomperts, R. E. Stratmann, O. Yazyev, A. J. Austin, R. Cammi, C. Pomelli, J. W. Ochterski, R. L. Martin, K. Morokuma, V. G. Zakrzewski, G. A. Voth, P. Salvador, J. J. Dannenberg, S. Dapprich, A. D. Daniels, O. Farkas, J. B. Foresman, J. V. Ortiz, J. Cioslowski, and D. J. Fox, Gaussian, Inc., Wallingford CT, 2013.
- 11 W. Wang, T. Sun, Y. Zhang and Y. B. Wang, *J. Chem. Phys.*, 2015, **143**, 114312.
- 12 W. Wang, Y. Zhang and Y. B. Wang, *Int. J. Quantum Chem.*, 2017, **117**, e25345.
- 13 R. F. W. Bader, *Atoms in Molecules, A Quantum Theory*, Clarendon Press, Oxford, 1990.
- 14 F. Biegler-König, J. Schönbohm and D. Bayles, *J. Comput. Chem.*, 2001, **22**, 545–559.

**S7. The CheckCIF reports for the thirteen cocrystals.**

## checkCIF/PLATON report

Structure factors have been supplied for datablock(s) C4-I12

THIS REPORT IS FOR GUIDANCE ONLY. IF USED AS PART OF A REVIEW PROCEDURE FOR PUBLICATION, IT SHOULD NOT REPLACE THE EXPERTISE OF AN EXPERIENCED CRYSTALLOGRAPHIC REFEREE.

No syntax errors found. CIF dictionary Interpreting this report

### Datablock: C4-I12

---

Bond precision: C-C = 0.0089 Å Wavelength=0.71073  
Cell: a=8.1008 (7) b=8.2512 (6) c=10.7542 (8)  
alpha=76.846 (6) beta=78.005 (7) gamma=89.406 (6)  
Temperature: 295 K

|                        | Calculated                | Reported         |
|------------------------|---------------------------|------------------|
| Volume                 | 684.17 (10)               | 684.17 (9)       |
| Space group            | P -1                      | P-1              |
| Hall group             | -P 1                      | ?                |
| Moiety formula         | C6 F4 I2, 0.5 (C8 H16 O4) | ?                |
| Sum formula            | C10 H8 F4 I2 O2           | C20 H16 F8 I4 O4 |
| Mr                     | 489.96                    | 979.93           |
| Dx, g cm <sup>-3</sup> | 2.378                     | 2.378            |
| Z                      | 2                         | 1                |
| Mu (mm <sup>-1</sup> ) | 4.634                     | 4.634            |
| F000                   | 452.0                     | 452.0            |
| F000'                  | 450.39                    |                  |
| h, k, lmax             | 9, 9, 13                  | 9, 9, 13         |
| Nref                   | 2527                      | 2524             |
| Tmin, Tmax             | 0.271, 0.629              | 0.337, 0.654     |
| Tmin'                  | 0.228                     |                  |

Correction method= # Reported T Limits: Tmin=0.337 Tmax=0.654  
AbsCorr = MULTI-SCAN

Data completeness= 0.999 Theta (max)= 25.490

R(reflections)= 0.0377 ( 1992) wR2(reflections)=  
0.0776 ( 2524)  
S = 1.042 Npar= 163

---

The following ALERTS were generated. Each ALERT has the format  
**test-name\_ALERT\_alert-type\_alert-level.**

Click on the hyperlinks for more details of the test.

---

● **Alert level C**

|                   |                                       |    |      |   |              |
|-------------------|---------------------------------------|----|------|---|--------------|
| PLAT334_ALERT_2_C | Small <C-C> Benzene Dist.             | C5 | -C10 | . | 1.37 Ang.    |
| PLAT342_ALERT_3_C | Low Bond Precision on C-C Bonds ..... |    |      |   | 0.00887 Ang. |

---

● **Alert level G**

|                   |                                                  |            |              |   |             |
|-------------------|--------------------------------------------------|------------|--------------|---|-------------|
| PLAT005_ALERT_5_G | No Embedded Refinement Details Found             | in the CIF |              |   | Please Do ! |
| PLAT045_ALERT_1_G | Calculated and Reported Z Differ by a Factor ... |            |              |   | 2 Check     |
| PLAT431_ALERT_2_G | Short Inter HL..A Contact I1                     |            | ..03         | . | 3.01 Ang.   |
|                   |                                                  |            | x,1+y,-1+z = |   | 1_564 Check |
| PLAT431_ALERT_2_G | Short Inter HL..A Contact I2                     |            | ..02         | . | 3.13 Ang.   |
|                   |                                                  |            | x,y,-1+z =   |   | 1_554 Check |
| PLAT899_ALERT_4_G | SHELXL-97 is Deprecated and Succeeded by SHELXL  |            |              |   | 2019/3 Note |
| PLAT910_ALERT_3_G | Missing # of FCF Reflection(s) Below Theta(Min). |            |              |   | 4 Note      |
| PLAT978_ALERT_2_G | Number C-C Bonds with Positive Residual Density. |            |              |   | 1 Info      |
| PLAT992_ALERT_5_G | Repd & Actual _reflns_number_gt Values Differ by |            |              |   | 6 Check     |

---

0 **ALERT level A** = Most likely a serious problem - resolve or explain  
0 **ALERT level B** = A potentially serious problem, consider carefully  
2 **ALERT level C** = Check. Ensure it is not caused by an omission or oversight  
8 **ALERT level G** = General information/check it is not something unexpected

1 ALERT type 1 CIF construction/syntax error, inconsistent or missing data  
4 ALERT type 2 Indicator that the structure model may be wrong or deficient  
2 ALERT type 3 Indicator that the structure quality may be low  
1 ALERT type 4 Improvement, methodology, query or suggestion  
2 ALERT type 5 Informative message, check

---



It is advisable to attempt to resolve as many as possible of the alerts in all categories. Often the minor alerts point to easily fixed oversights, errors and omissions in your CIF or refinement strategy, so attention to these fine details can be worthwhile. In order to resolve some of the more serious problems it may be necessary to carry out additional measurements or structure refinements. However, the purpose of your study may justify the reported deviations and the more serious of these should normally be commented upon in the discussion or experimental section of a paper or in the "special\_details" fields of the CIF. checkCIF was carefully designed to identify outliers and unusual parameters, but every test has its limitations and alerts that are not important in a particular case may appear. Conversely, the absence of alerts does not guarantee there are no aspects of the results needing attention. It is up to the individual to critically assess their own results and, if necessary, seek expert advice.

### **Publication of your CIF in IUCr journals**

A basic structural check has been run on your CIF. These basic checks will be run on all CIFs submitted for publication in IUCr journals (*Acta Crystallographica*, *Journal of Applied Crystallography*, *Journal of Synchrotron Radiation*); however, if you intend to submit to *Acta Crystallographica Section C* or *E* or *IUCrData*, you should make sure that full publication checks are run on the final version of your CIF prior to submission.

### **Publication of your CIF in other journals**

Please refer to the *Notes for Authors* of the relevant journal for any special instructions relating to CIF submission.

---

**PLATON version of 06/07/2023; check.def file version of 30/06/2023**

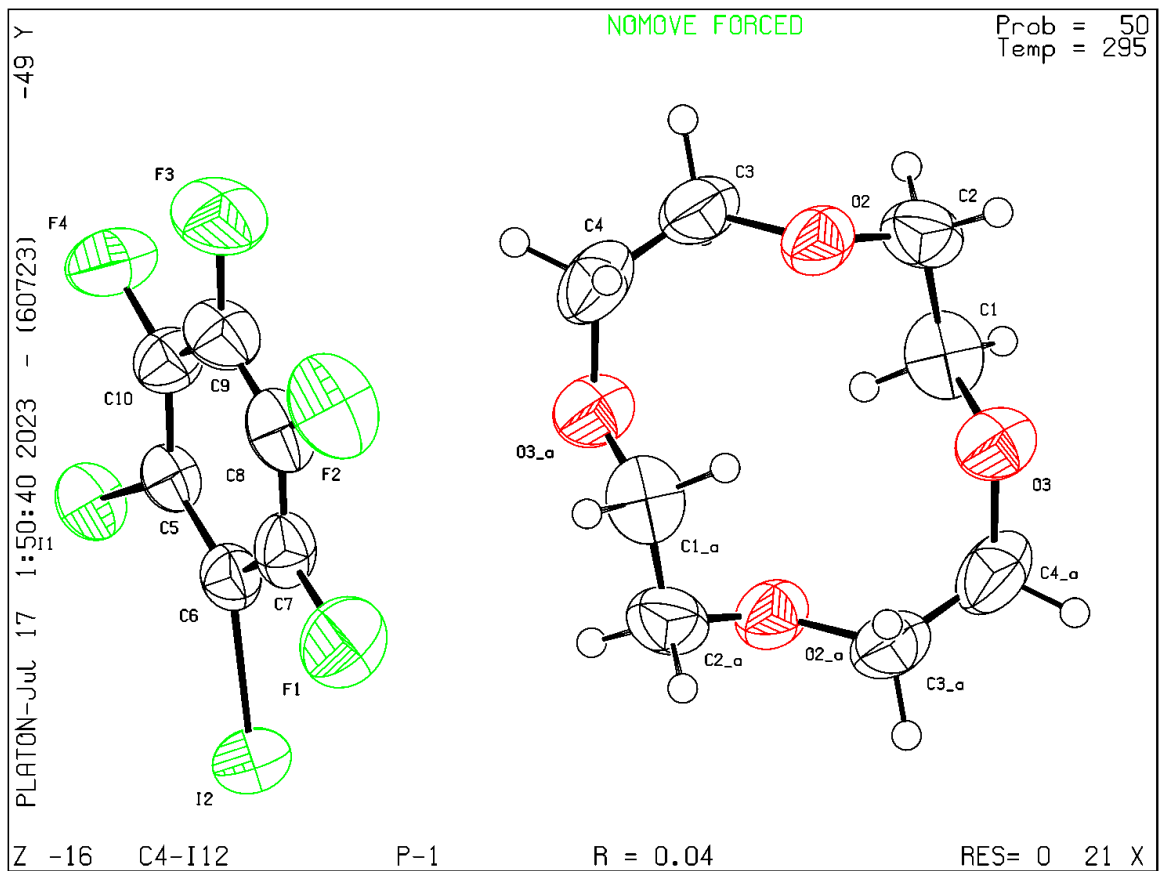

## checkCIF/PLATON report

Structure factors have been supplied for datablock(s) C4-I13

THIS REPORT IS FOR GUIDANCE ONLY. IF USED AS PART OF A REVIEW PROCEDURE FOR PUBLICATION, IT SHOULD NOT REPLACE THE EXPERTISE OF AN EXPERIENCED CRYSTALLOGRAPHIC REFEREE.

No syntax errors found.    CIF dictionary    Interpreting this report

### Datablock: C4-I13

---

Bond precision:    C-C = 0.0081 Å                  Wavelength=0.71073  
Cell:                  a=12.0376(4)                  b=15.4508(8)                  c=7.5142(3)  
                          alpha=90                  beta=95.120(3)                  gamma=90  
Temperature:          293 K

|                        | Calculated               | Reported           |
|------------------------|--------------------------|--------------------|
| Volume                 | 1391.99(10)              | 1391.99(10)        |
| Space group            | P 21/c                   | P 1 21/c 1         |
| Hall group             | -P 2ybc                  | -P 2ybc            |
| Moiety formula         | C6 F4 I2, 0.5(C8 H16 O4) | C6 F4 I2, C4 H8 O2 |
| Sum formula            | C10 H8 F4 I2 O2          | C10 H8 F4 I2 O2    |
| Mr                     | 489.96                   | 489.96             |
| Dx, g cm <sup>-3</sup> | 2.338                    | 2.338              |
| Z                      | 4                        | 4                  |
| Mu (mm <sup>-1</sup> ) | 4.555                    | 4.555              |
| F000                   | 904.0                    | 904.0              |
| F000'                  | 900.77                   |                    |
| h, k, lmax             | 16, 20, 10               | 15, 19, 9          |
| Nref                   | 3455                     | 2945               |
| Tmin, Tmax             | 0.445, 0.529             | 0.298, 1.000       |
| Tmin'                  | 0.436                    |                    |

Correction method= # Reported T Limits: Tmin=0.298 Tmax=1.000  
AbsCorr = MULTI-SCAN

Data completeness= 0.852                          Theta(max)= 28.304

R(reflections)= 0.0439( 2262)

wR2(reflections)=  
0.0949( 2945)

S = 1.060

Npar= 173

---

The following ALERTS were generated. Each ALERT has the format

**test-name\_ALERT\_alert-type\_alert-level.**

Click on the hyperlinks for more details of the test.

---

● **Alert level C**

|                   |                                                  |              |
|-------------------|--------------------------------------------------|--------------|
| PLAT042_ALERT_1_C | Calc. and Reported MoietyFormula Strings Differ  | Please Check |
| PLAT342_ALERT_3_C | Low Bond Precision on C-C Bonds .....            | 0.00812 Ang. |
| PLAT906_ALERT_3_C | Large K Value in the Analysis of Variance .....  | 6.704 Check  |
| PLAT910_ALERT_3_C | Missing # of FCF Reflection(s) Below Theta(Min). | 6 Note       |
| PLAT911_ALERT_3_C | Missing FCF Refl Between Thmin & STh/L= 0.600    | 5 Report     |

---

● **Alert level G**

|                   |                                                  |                   |
|-------------------|--------------------------------------------------|-------------------|
| PLAT003_ALERT_2_G | Number of Uiso or Uij Restrained non-H Atoms ... | 3 Report          |
| PLAT012_ALERT_1_G | N.O.K. _shelx_res_checksum Found in CIF .....    | Please Check      |
| PLAT013_ALERT_1_G | N.O.K. _shelx_hkl_checksum Found in CIF .....    | Please Check      |
| PLAT171_ALERT_4_G | The CIF-Embedded .res File Contains EADP Records | 1 Report          |
| PLAT178_ALERT_4_G | The CIF-Embedded .res File Contains SIMU Records | 1 Report          |
| PLAT187_ALERT_4_G | The CIF-Embedded .res File Contains RIGU Records | 1 Report          |
| PLAT188_ALERT_3_G | A Non-default SIMU Restraint Value has been used | 0.0100 Report     |
| PLAT190_ALERT_3_G | A Non-default RIGU Restraint Value for First Par | 0.0100 Report     |
| PLAT190_ALERT_3_G | A Non-default RIGU Restraint Value for SecondPar | 0.0200 Report     |
| PLAT199_ALERT_1_G | Reported _cell_measurement_temperature .....     | 293 Check (K)     |
| PLAT200_ALERT_1_G | Reported _diffrn_ambient_temperature .....       | 293 Check (K)     |
| PLAT301_ALERT_3_G | Main Residue Disorder .....                      | 8% Note (Resd 1 ) |
| PLAT431_ALERT_2_G | Short Inter HL..A Contact I2 ..02 .              | 3.00 Ang.         |
|                   | -1+x,y,-1+z =                                    | 1_454 Check       |
| PLAT434_ALERT_2_G | Short Inter HL..HL Contact F1 ..F1 .             | 2.78 Ang.         |
|                   | 1-x,1-y,-z =                                     | 3_665 Check       |
| PLAT860_ALERT_3_G | Number of Least-Squares Restraints .....         | 25 Note           |
| PLAT912_ALERT_4_G | Missing # of FCF Reflections Above STh/L= 0.600  | 479 Note          |
| PLAT913_ALERT_3_G | Missing # of Very Strong Reflections in FCF .... | 2 Note            |
| PLAT933_ALERT_2_G | Number of HKL-OMIT Records in Embedded .res File | 7 Note            |
| PLAT941_ALERT_3_G | Average HKL Measurement Multiplicity .....       | 2.8 Low           |
| PLAT978_ALERT_2_G | Number C-C Bonds with Positive Residual Density. | 0 Info            |

---

- 0 **ALERT level A** = Most likely a serious problem - resolve or explain  
0 **ALERT level B** = A potentially serious problem, consider carefully  
5 **ALERT level C** = Check. Ensure it is not caused by an omission or oversight  
20 **ALERT level G** = General information/check it is not something unexpected

- 5 ALERT type 1 CIF construction/syntax error, inconsistent or missing data  
5 ALERT type 2 Indicator that the structure model may be wrong or deficient  
11 ALERT type 3 Indicator that the structure quality may be low  
4 ALERT type 4 Improvement, methodology, query or suggestion  
0 ALERT type 5 Informative message, check
-

It is advisable to attempt to resolve as many as possible of the alerts in all categories. Often the minor alerts point to easily fixed oversights, errors and omissions in your CIF or refinement strategy, so attention to these fine details can be worthwhile. In order to resolve some of the more serious problems it may be necessary to carry out additional measurements or structure refinements. However, the purpose of your study may justify the reported deviations and the more serious of these should normally be commented upon in the discussion or experimental section of a paper or in the "special\_details" fields of the CIF. checkCIF was carefully designed to identify outliers and unusual parameters, but every test has its limitations and alerts that are not important in a particular case may appear. Conversely, the absence of alerts does not guarantee there are no aspects of the results needing attention. It is up to the individual to critically assess their own results and, if necessary, seek expert advice.

### **Publication of your CIF in IUCr journals**

A basic structural check has been run on your CIF. These basic checks will be run on all CIFs submitted for publication in IUCr journals (*Acta Crystallographica*, *Journal of Applied Crystallography*, *Journal of Synchrotron Radiation*); however, if you intend to submit to *Acta Crystallographica Section C* or *E* or *IUCrData*, you should make sure that full publication checks are run on the final version of your CIF prior to submission.

### **Publication of your CIF in other journals**

Please refer to the *Notes for Authors* of the relevant journal for any special instructions relating to CIF submission.

---

**PLATON version of 06/07/2023; check.def file version of 30/06/2023**

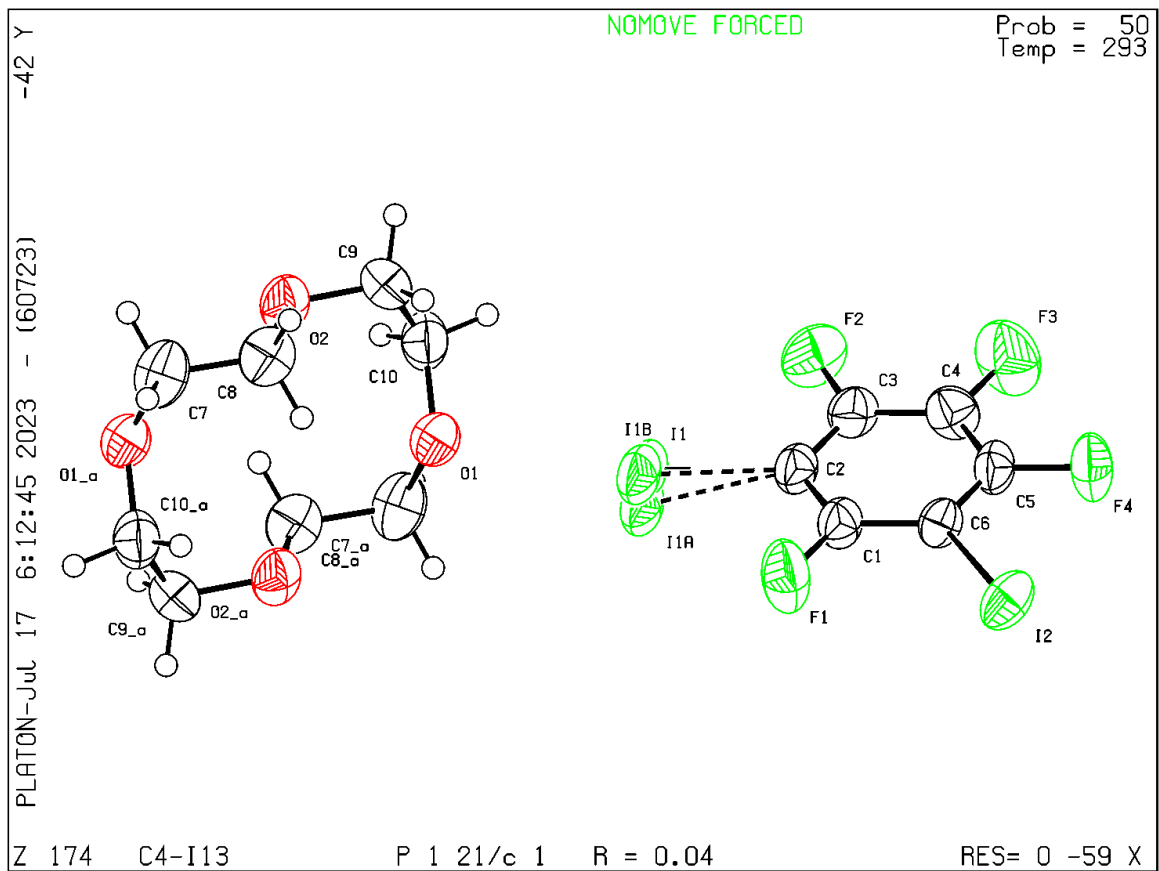



---

The following ALERTS were generated. Each ALERT has the format  
**test-name\_ALERT\_alert-type\_alert-level.**  
Click on the hyperlinks for more details of the test.

---

 **Alert level A**

PLAT431\_ALERT\_2\_A Short Inter HL..A Contact I2 ..01 . 2.99 Ang.  
1-x,1-y,1-z = 2\_666 Check

**Author Response: The Checkcif software has a bug and cannot identify the halogen bond.**

---

 **Alert level C**

PLAT199\_ALERT\_1\_C Reported \_cell\_measurement\_temperature ..... (K) 293 Check  
PLAT200\_ALERT\_1\_C Reported \_diffrn\_ambient\_temperature ..... (K) 293 Check  
PLAT242\_ALERT\_2\_C Low 'MainMol' Ueq as Compared to Neighbors of C6 Check  
PLAT334\_ALERT\_2\_C Small <C-C> Benzene Dist. C4 -C6\_b . 1.37 Ang.  
PLAT342\_ALERT\_3\_C Low Bond Precision on C-C Bonds ..... 0.00888 Ang.  
PLAT910\_ALERT\_3\_C Missing # of FCF Reflection(s) Below Theta(Min). 7 Note

---

 **Alert level G**

PLAT005\_ALERT\_5\_G No Embedded Refinement Details Found in the CIF Please Do !  
PLAT154\_ALERT\_1\_G The s.u.'s on the Cell Angles are Equal ..(Note) 0.007 Degree  
PLAT431\_ALERT\_2\_G Short Inter HL..A Contact I1 ..02 . 3.00 Ang.  
x,y,z = 1\_555 Check

**Author Response: The Checkcif software has a bug and cannot identify the halogen bond.**

---

PLAT764\_ALERT\_4\_G Overcomplete CIF Bond List Detected (Rep/Expd) . 1.17 Ratio  
PLAT899\_ALERT\_4\_G SHELXL-97 is Deprecated and Succeeded by SHELXL 2019/3 Note  
PLAT912\_ALERT\_4\_G Missing # of FCF Reflections Above STh/L= 0.600 1 Note  
PLAT978\_ALERT\_2\_G Number C-C Bonds with Positive Residual Density. 0 Info

---

- 1 **ALERT level A** = Most likely a serious problem - resolve or explain  
0 **ALERT level B** = A potentially serious problem, consider carefully  
6 **ALERT level C** = Check. Ensure it is not caused by an omission or oversight  
7 **ALERT level G** = General information/check it is not something unexpected
- 3 ALERT type 1 CIF construction/syntax error, inconsistent or missing data  
5 ALERT type 2 Indicator that the structure model may be wrong or deficient  
2 ALERT type 3 Indicator that the structure quality may be low  
3 ALERT type 4 Improvement, methodology, query or suggestion  
1 ALERT type 5 Informative message, check
- 
-



It is advisable to attempt to resolve as many as possible of the alerts in all categories. Often the minor alerts point to easily fixed oversights, errors and omissions in your CIF or refinement strategy, so attention to these fine details can be worthwhile. In order to resolve some of the more serious problems it may be necessary to carry out additional measurements or structure refinements. However, the purpose of your study may justify the reported deviations and the more serious of these should normally be commented upon in the discussion or experimental section of a paper or in the "special\_details" fields of the CIF. checkCIF was carefully designed to identify outliers and unusual parameters, but every test has its limitations and alerts that are not important in a particular case may appear. Conversely, the absence of alerts does not guarantee there are no aspects of the results needing attention. It is up to the individual to critically assess their own results and, if necessary, seek expert advice.

### **Publication of your CIF in IUCr journals**

A basic structural check has been run on your CIF. These basic checks will be run on all CIFs submitted for publication in IUCr journals (*Acta Crystallographica*, *Journal of Applied Crystallography*, *Journal of Synchrotron Radiation*); however, if you intend to submit to *Acta Crystallographica Section C* or *E* or *IUCrData*, you should make sure that full publication checks are run on the final version of your CIF prior to submission.

### **Publication of your CIF in other journals**

Please refer to the *Notes for Authors* of the relevant journal for any special instructions relating to CIF submission.

---

**PLATON version of 06/07/2023; check.def file version of 30/06/2023**

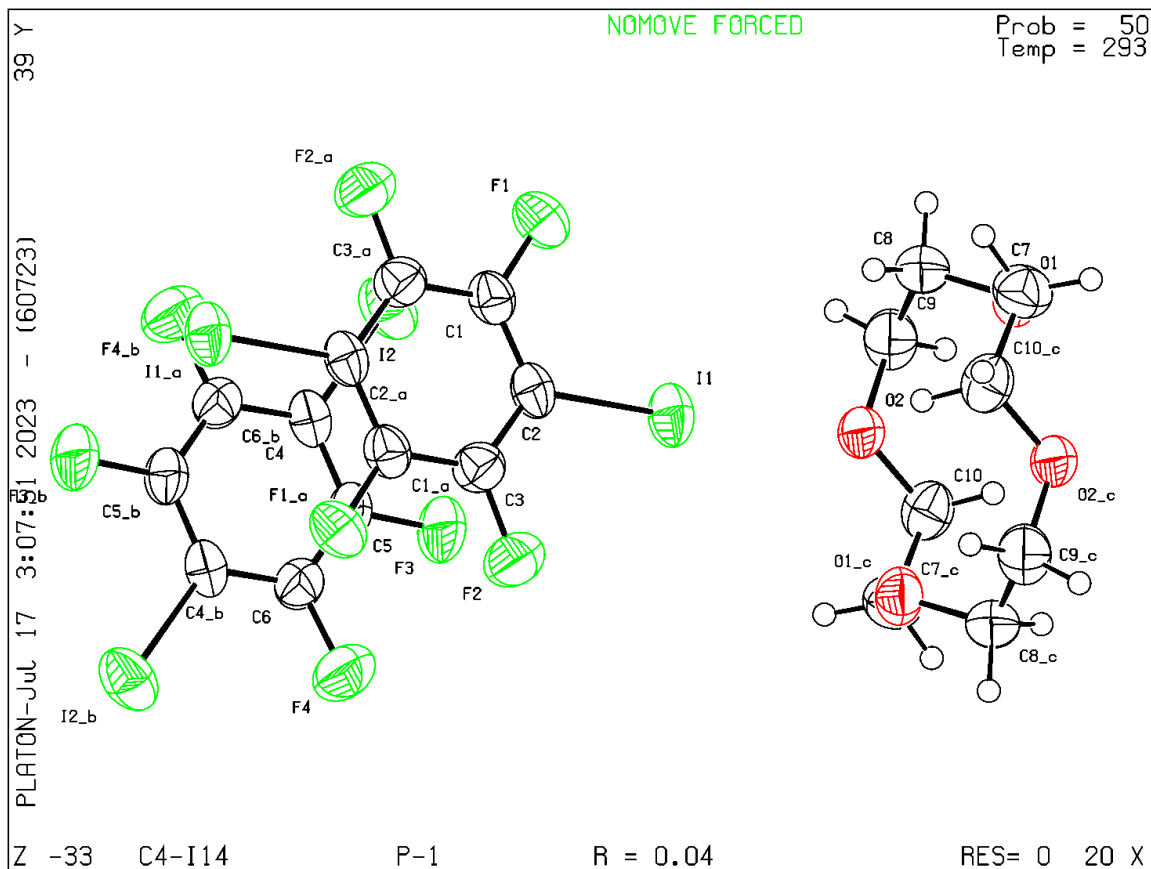

## checkCIF/PLATON report

Structure factors have been supplied for datablock(s) C4-I135

THIS REPORT IS FOR GUIDANCE ONLY. IF USED AS PART OF A REVIEW PROCEDURE FOR PUBLICATION, IT SHOULD NOT REPLACE THE EXPERTISE OF AN EXPERIENCED CRYSTALLOGRAPHIC REFEREE.

No syntax errors found.    CIF dictionary    Interpreting this report

### Datablock: C4-I135

---

Bond precision:    C-C = 0.0088 A                                Wavelength=0.71073

Cell:                                a=4.6368 (5)                b=29.139 (4)                c=7.3508 (6)  
                                                                     alpha=90                    beta=97.411 (9)            gamma=90

Temperature:                293 K

|                        | Calculated          | Reported            |
|------------------------|---------------------|---------------------|
| Volume                 | 984.88 (19)         | 984.9 (2)           |
| Space group            | P 21/m              | P 1 21/m 1          |
| Hall group             | -P 2yb              | -P 2yb              |
| Moiety formula         | C6 F3 I3, C8 H16 O4 | C6 F3 I3, C8 H16 O4 |
| Sum formula            | C14 H16 F3 I3 O4    | C14 H16 F3 I3 O4    |
| Mr                     | 685.97              | 685.97              |
| Dx, g cm <sup>-3</sup> | 2.313               | 2.313               |
| Z                      | 2                   | 2                   |
| Mu (mm <sup>-1</sup> ) | 4.802               | 4.802               |
| F000                   | 636.0               | 636.0               |
| F000'                  | 633.50              |                     |
| h, k, lmax             | 6, 40, 10           | 6, 39, 9            |
| Nref                   | 2755                | 2308                |
| Tmin, Tmax             | 0.390, 0.464        | 0.402, 1.000        |
| Tmin'                  | 0.319               |                     |

Correction method= # Reported T Limits: Tmin=0.402 Tmax=1.000  
AbsCorr = MULTI-SCAN

Data completeness= 0.838                                Theta (max)= 29.316

R(reflections)= 0.0531 ( 1665)

wR2(reflections)=  
0.1101 ( 2308)

S = 1.078

Npar= 119

---

The following ALERTS were generated. Each ALERT has the format

**test-name\_ALERT\_alert-type\_alert-level.**

Click on the hyperlinks for more details of the test.

---

● **Alert level C**

|                   |         |                                           |         |       |
|-------------------|---------|-------------------------------------------|---------|-------|
| PLAT242_ALERT_2_C | Low     | 'MainMol' Ueq as Compared to Neighbors of | 02      | Check |
| PLAT342_ALERT_3_C | Low     | Bond Precision on C-C Bonds .....         | 0.00883 | Ang.  |
| PLAT906_ALERT_3_C | Large   | K Value in the Analysis of Variance ..... | 11.472  | Check |
| PLAT906_ALERT_3_C | Large   | K Value in the Analysis of Variance ..... | 2.685   | Check |
| PLAT910_ALERT_3_C | Missing | # of FCF Reflection(s) Below Theta(Min).  | 5       | Note  |
| PLAT975_ALERT_2_C | Check   | Calcd Resid. Dens. 0.88Ang From O2        | 0.49    | eA-3  |

---

● **Alert level G**

|                   |          |                                                |        |              |
|-------------------|----------|------------------------------------------------|--------|--------------|
| PLAT003_ALERT_2_G | Number   | of Uiso or Uij Restrained non-H Atoms ...      | 4      | Report       |
| PLAT012_ALERT_1_G | N.O.K.   | _shelx_res_checksum Found in CIF .....         |        | Please Check |
| PLAT013_ALERT_1_G | N.O.K.   | _shelx_hkl_checksum Found in CIF .....         |        | Please Check |
| PLAT171_ALERT_4_G | The      | CIF-Embedded .res File Contains EADP Records   | 1      | Report       |
| PLAT177_ALERT_4_G | The      | CIF-Embedded .res File Contains DELU Records   | 1      | Report       |
| PLAT178_ALERT_4_G | The      | CIF-Embedded .res File Contains SIMU Records   | 1      | Report       |
| PLAT187_ALERT_4_G | The      | CIF-Embedded .res File Contains RIGU Records   | 1      | Report       |
| PLAT188_ALERT_3_G | A        | Non-default SIMU Restraint Value has been used | 0.0100 | Report       |
| PLAT190_ALERT_3_G | A        | Non-default RIGU Restraint Value for First Par | 0.0100 | Report       |
| PLAT190_ALERT_3_G | A        | Non-default RIGU Restraint Value for SecondPar | 0.0200 | Report       |
| PLAT192_ALERT_3_G | A        | Non-default DELU Restraint Value for First Par | 0.0010 | Report       |
| PLAT192_ALERT_3_G | A        | Non-default DELU Restraint Value for SecondPar | 0.0020 | Report       |
| PLAT199_ALERT_1_G | Reported | _cell_measurement_temperature .....            | 293    | Check        |
| PLAT200_ALERT_1_G | Reported | _diffn_ambient_temperature .....               | 293    | Check        |
| PLAT301_ALERT_3_G | Main     | Residue Disorder .....                         | 17%    | Note         |
| PLAT434_ALERT_2_G | Short    | Inter HL..HL Contact I2 ..F2                   | 3.04   | Ang.         |
|                   |          | -1+x,y,1+z =                                   | 1_456  | Check        |
| PLAT860_ALERT_3_G | Number   | of Least-Squares Restraints .....              | 11     | Note         |
| PLAT912_ALERT_4_G | Missing  | # of FCF Reflections Above STh/L= 0.600        | 430    | Note         |
| PLAT941_ALERT_3_G | Average  | HKL Measurement Multiplicity .....             | 1.9    | Low          |
| PLAT978_ALERT_2_G | Number   | C-C Bonds with Positive Residual Density.      | 0      | Info         |

---

- 0 **ALERT level A** = Most likely a serious problem - resolve or explain  
0 **ALERT level B** = A potentially serious problem, consider carefully  
6 **ALERT level C** = Check. Ensure it is not caused by an omission or oversight  
20 **ALERT level G** = General information/check it is not something unexpected

- 4 ALERT type 1 CIF construction/syntax error, inconsistent or missing data  
5 ALERT type 2 Indicator that the structure model may be wrong or deficient  
12 ALERT type 3 Indicator that the structure quality may be low  
5 ALERT type 4 Improvement, methodology, query or suggestion  
0 ALERT type 5 Informative message, check
-

It is advisable to attempt to resolve as many as possible of the alerts in all categories. Often the minor alerts point to easily fixed oversights, errors and omissions in your CIF or refinement strategy, so attention to these fine details can be worthwhile. In order to resolve some of the more serious problems it may be necessary to carry out additional measurements or structure refinements. However, the purpose of your study may justify the reported deviations and the more serious of these should normally be commented upon in the discussion or experimental section of a paper or in the "special\_details" fields of the CIF. checkCIF was carefully designed to identify outliers and unusual parameters, but every test has its limitations and alerts that are not important in a particular case may appear. Conversely, the absence of alerts does not guarantee there are no aspects of the results needing attention. It is up to the individual to critically assess their own results and, if necessary, seek expert advice.

### **Publication of your CIF in IUCr journals**

A basic structural check has been run on your CIF. These basic checks will be run on all CIFs submitted for publication in IUCr journals (*Acta Crystallographica*, *Journal of Applied Crystallography*, *Journal of Synchrotron Radiation*); however, if you intend to submit to *Acta Crystallographica Section C* or *E* or *IUCrData*, you should make sure that full publication checks are run on the final version of your CIF prior to submission.

### **Publication of your CIF in other journals**

Please refer to the *Notes for Authors* of the relevant journal for any special instructions relating to CIF submission.

---

**PLATON version of 06/07/2023; check.def file version of 30/06/2023**

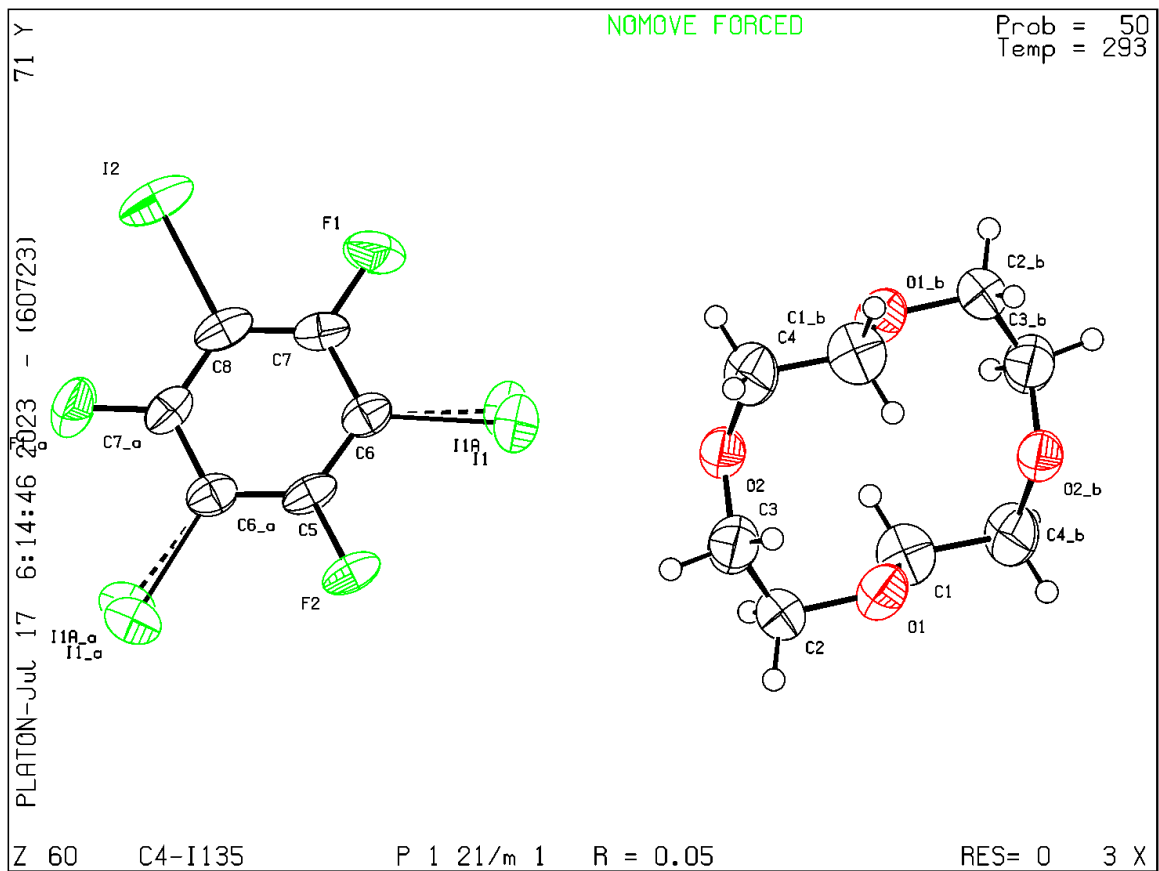

## checkCIF/PLATON report

Structure factors have been supplied for datablock(s) C5-I12

THIS REPORT IS FOR GUIDANCE ONLY. IF USED AS PART OF A REVIEW PROCEDURE FOR PUBLICATION, IT SHOULD NOT REPLACE THE EXPERTISE OF AN EXPERIENCED CRYSTALLOGRAPHIC REFEREE.

No syntax errors found.      CIF dictionary      Interpreting this report

### Datablock: C5-I12

---

Bond precision:    C-C = 0.0196 Å                      Wavelength=0.71073

Cell:                      a=12.3775 (18)            b=7.6176 (10)            c=22.623 (3)  
                                        alpha=90                      beta=100.287 (13)            gamma=90

Temperature:            295 K

|                        | Calculated           | Reported         |
|------------------------|----------------------|------------------|
| Volume                 | 2098.8 (5)           | 2098.8 (5)       |
| Space group            | P 21/c               | P2 (1) /c        |
| Hall group             | -P 2ybc              | ?                |
| Moiety formula         | C10 H20 O5, C6 F4 I2 | ?                |
| Sum formula            | C16 H20 F4 I2 O5     | C16 H20 F4 I2 O5 |
| Mr                     | 622.12               | 622.12           |
| Dx, g cm <sup>-3</sup> | 1.969                | 1.969            |
| Z                      | 4                    | 4                |
| Mu (mm <sup>-1</sup> ) | 3.054                | 3.054            |
| F000                   | 1192.0               | 1192.0           |
| F000'                  | 1188.92              |                  |
| h, k, lmax             | 14, 9, 27            | 14, 9, 27        |
| Nref                   | 3900                 | 3884             |
| Tmin, Tmax             | 0.346, 0.737         | 0.375, 0.750     |
| Tmin'                  | 0.283                |                  |

Correction method= # Reported T Limits: Tmin=0.375 Tmax=0.750  
AbsCorr = MULTI-SCAN

Data completeness= 0.996                      Theta (max)= 25.500

R(reflections)= 0.0878 ( 2728)

wR2(reflections)=  
0.3317 ( 3884)

S = 1.128

Npar= 238

---

The following ALERTS were generated. Each ALERT has the format  
**test-name\_ALERT\_alert-type\_alert-level.**  
Click on the hyperlinks for more details of the test.

---

**Alert level A**

PLAT431\_ALERT\_2\_A Short Inter HL..A Contact I1 ..04 . 2.92 Ang.  
2-x,1-y,1-z = 3\_766 Check

**Author Response: The Checkcif software has a bug and cannot identify the halogen bond.**

PLAT431\_ALERT\_2\_A Short Inter HL..A Contact I2 ..01 . 2.91 Ang.  
1+x,y,z = 1\_655 Check

**Author Response: The Checkcif software has a bug and cannot identify the halogen bond.**

---

**Alert level C**

PLAT084\_ALERT\_3\_C High wR2 Value (i.e. > 0.25) ..... 0.33 Report  
PLAT214\_ALERT\_2\_C Atom C6 (Anion/Solvent) ADP max/min Ratio 4.2 oblate  
PLAT234\_ALERT\_4\_C Large Hirshfeld Difference C7 --C8 . 0.23 Ang.  
PLAT342\_ALERT\_3\_C Low Bond Precision on C-C Bonds ..... 0.01956 Ang.  
PLAT360\_ALERT\_2\_C Short C(sp3)-C(sp3) Bond C11 - C12 . 1.43 Ang.  
PLAT910\_ALERT\_3\_C Missing # of FCF Reflection(s) Below Theta(Min). 5 Note  
PLAT911\_ALERT\_3\_C Missing FCF Refl Between Thmin & STh/L= 0.600 11 Report  
PLAT918\_ALERT\_3\_C Reflection(s) with I(obs) much Smaller I(calc) . 1 Check  
PLAT971\_ALERT\_2\_C Check Calcd Resid. Dens. 0.16Ang From I2 2.49 eA-3  
PLAT971\_ALERT\_2\_C Check Calcd Resid. Dens. 0.16Ang From I1 1.78 eA-3  
PLAT972\_ALERT\_2\_C Check Calcd Resid. Dens. 0.66Ang From I2 -1.92 eA-3  
PLAT972\_ALERT\_2\_C Check Calcd Resid. Dens. 0.68Ang From I2 -1.82 eA-3  
PLAT972\_ALERT\_2\_C Check Calcd Resid. Dens. 0.80Ang From I1 -1.82 eA-3  
PLAT972\_ALERT\_2\_C Check Calcd Resid. Dens. 1.65Ang From I1 -1.52 eA-3  
PLAT977\_ALERT\_2\_C Check Negative Difference Density on H7A . -0.47 eA-3  
PLAT977\_ALERT\_2\_C Check Negative Difference Density on H10B . -0.63 eA-3  
PLAT977\_ALERT\_2\_C Check Negative Difference Density on H12B . -0.32 eA-3  
PLAT977\_ALERT\_2\_C Check Negative Difference Density on H14A . -0.32 eA-3  
PLAT977\_ALERT\_2\_C Check Negative Difference Density on H15A . -0.35 eA-3  
PLAT977\_ALERT\_2\_C Check Negative Difference Density on H15B . -0.41 eA-3  
PLAT977\_ALERT\_2\_C Check Negative Difference Density on H14C . -0.38 eA-3

---

**Alert level G**

PLAT003\_ALERT\_2\_G Number of Uiso or Uij Restrained non-H Atoms ... 5 Report  
PLAT005\_ALERT\_5\_G No Embedded Refinement Details Found in the CIF Please Do !  
PLAT072\_ALERT\_2\_G SHELXL First Parameter in WGHT Unusually Large 0.20 Report  
PLAT083\_ALERT\_2\_G SHELXL Second Parameter in WGHT Unusually Large 6.31 Why ?  
PLAT301\_ALERT\_3\_G Main Residue Disorder .....(Resd 1 ) 33% Note  
PLAT398\_ALERT\_2\_G Deviating C-O-C Angle From 120 for O5 . 109.3 Degree  
PLAT410\_ALERT\_2\_G Short Intra H...H Contact H12B ..H13A . 1.96 Ang.  
x,y,z = 1\_555 Check  
PLAT779\_ALERT\_4\_G Suspect or Irrelevant (Bond) Angle(s) in CIF ... 5.37 Deg.  
C16 -O1 -C16' 1\_555 1\_555 1\_555 ..... # 107 Check



|                   |                                                  |             |
|-------------------|--------------------------------------------------|-------------|
| PLAT779_ALERT_4_G | Suspect or Irrelevant (Bond) Angle(s) in CIF ... | 1.20 Deg.   |
|                   | C13 -O4 -C13' 1_555 1_555 1_555 ..... # 110      | Check       |
| PLAT860_ALERT_3_G | Number of Least-Squares Restraints .....         | 37 Note     |
| PLAT899_ALERT_4_G | SHELXL-97 is Deprecated and Succeeded by SHELXL  | 2019/3 Note |
| PLAT978_ALERT_2_G | Number C-C Bonds with Positive Residual Density. | 0 Info      |
| PLAT992_ALERT_5_G | Repd & Actual _reflns_number_gt Values Differ by | 2 Check     |

---

2 **ALERT level A** = Most likely a serious problem - resolve or explain  
0 **ALERT level B** = A potentially serious problem, consider carefully  
21 **ALERT level C** = Check. Ensure it is not caused by an omission or oversight  
13 **ALERT level G** = General information/check it is not something unexpected

0 ALERT type 1 CIF construction/syntax error, inconsistent or missing data  
23 ALERT type 2 Indicator that the structure model may be wrong or deficient  
7 ALERT type 3 Indicator that the structure quality may be low  
4 ALERT type 4 Improvement, methodology, query or suggestion  
2 ALERT type 5 Informative message, check

---

It is advisable to attempt to resolve as many as possible of the alerts in all categories. Often the minor alerts point to easily fixed oversights, errors and omissions in your CIF or refinement strategy, so attention to these fine details can be worthwhile. In order to resolve some of the more serious problems it may be necessary to carry out additional measurements or structure refinements. However, the purpose of your study may justify the reported deviations and the more serious of these should normally be commented upon in the discussion or experimental section of a paper or in the "special\_details" fields of the CIF. checkCIF was carefully designed to identify outliers and unusual parameters, but every test has its limitations and alerts that are not important in a particular case may appear. Conversely, the absence of alerts does not guarantee there are no aspects of the results needing attention. It is up to the individual to critically assess their own results and, if necessary, seek expert advice.

### Publication of your CIF in IUCr journals

A basic structural check has been run on your CIF. These basic checks will be run on all CIFs submitted for publication in IUCr journals (*Acta Crystallographica*, *Journal of Applied Crystallography*, *Journal of Synchrotron Radiation*); however, if you intend to submit to *Acta Crystallographica Section C* or *E* or *IUCrData*, you should make sure that full publication checks are run on the final version of your CIF prior to submission.

### Publication of your CIF in other journals

Please refer to the *Notes for Authors* of the relevant journal for any special instructions relating to CIF submission.

---

**PLATON version of 06/07/2023; check.def file version of 30/06/2023**

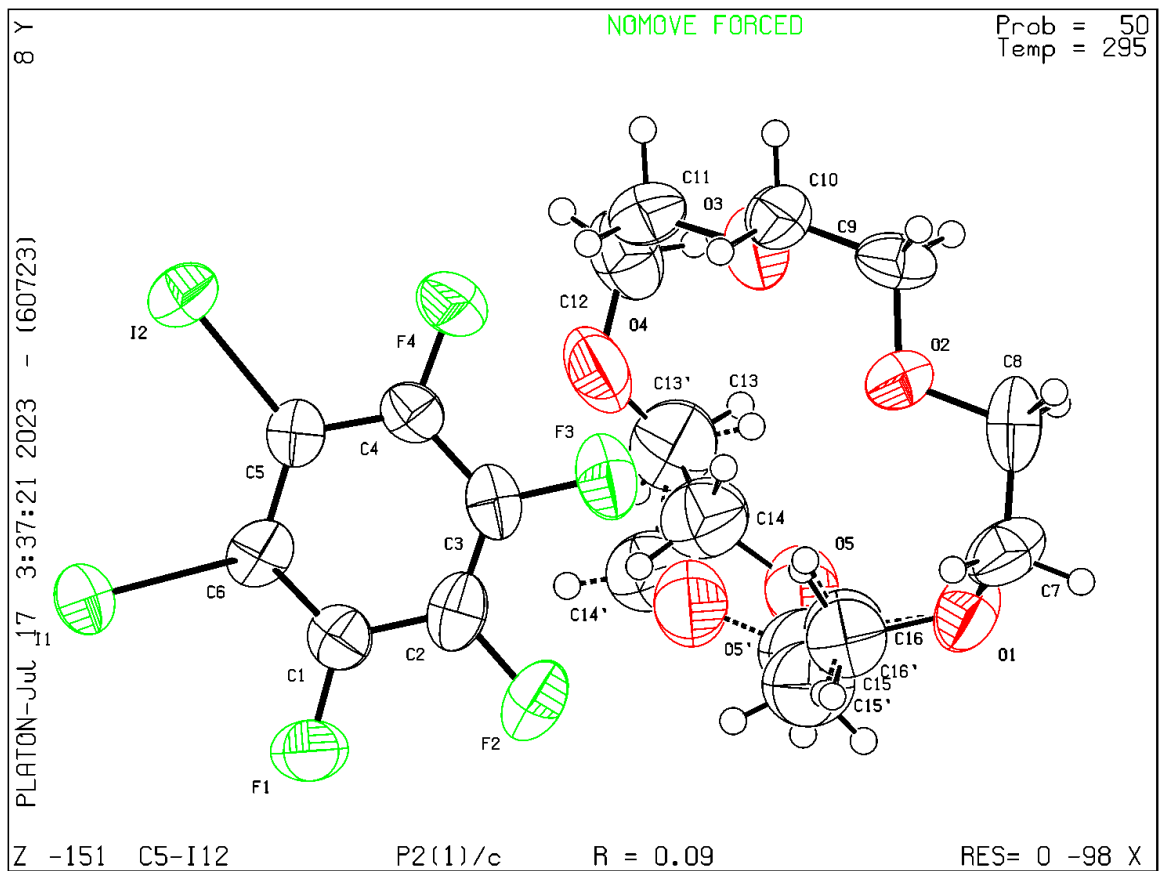

## checkCIF/PLATON report

Structure factors have been supplied for datablock(s) C5-I13-W

THIS REPORT IS FOR GUIDANCE ONLY. IF USED AS PART OF A REVIEW PROCEDURE FOR PUBLICATION, IT SHOULD NOT REPLACE THE EXPERTISE OF AN EXPERIENCED CRYSTALLOGRAPHIC REFEREE.

No syntax errors found.      CIF dictionary      Interpreting this report

### Datablock: C5-I13-W

---

|                        |                                                   |                                             |
|------------------------|---------------------------------------------------|---------------------------------------------|
| Bond precision:        | C-C = 0.0154 A                                    | Wavelength=0.71073                          |
| Cell:                  | a=7.4810(5)      b=22.1452(19)      c=14.6860(11) | alpha=90      beta=103.285(7)      gamma=90 |
| Temperature:           | 293 K                                             |                                             |
|                        | Calculated                                        | Reported                                    |
| Volume                 | 2367.9(3)                                         | 2367.9(3)                                   |
| Space group            | P 21/c                                            | P 1 21/c 1                                  |
| Hall group             | -P 2ybc                                           | -P 2ybc                                     |
| Moiety formula         | C10 H20 O5, C6 F4 I2, 2(H2 O)                     | C6 F4 I2, 2(H2 O), C10 H20 O5               |
| Sum formula            | C16 H24 F4 I2 O7                                  | C16 H24 F4 I2 O7                            |
| Mr                     | 658.15                                            | 658.15                                      |
| Dx, g cm <sup>-3</sup> | 1.846                                             | 1.846                                       |
| Z                      | 4                                                 | 4                                           |
| Mu (mm <sup>-1</sup> ) | 2.718                                             | 2.718                                       |
| F000                   | 1272.0                                            | 1272.0                                      |
| F000'                  | 1269.00                                           |                                             |
| h, k, lmax             | 9, 26, 17                                         | 9, 26, 17                                   |
| Nref                   | 4397                                              | 4376                                        |
| Tmin, Tmax             | 0.332, 0.455                                      | 0.399, 1.000                                |
| Tmin'                  | 0.283                                             |                                             |

Correction method= # Reported T Limits: Tmin=0.399 Tmax=1.000  
AbsCorr = MULTI-SCAN

Data completeness= 0.995      Theta(max)= 25.500

R(reflections)= 0.0594( 3201)      wR2(reflections)=  
0.1279( 4376)

S = 1.024      Npar= 262

---

The following ALERTS were generated. Each ALERT has the format

**test-name\_ALERT\_alert-type\_alert-level.**

Click on the hyperlinks for more details of the test.

---

● **Alert level C**

|                   |                                                  |              |
|-------------------|--------------------------------------------------|--------------|
| PLAT042_ALERT_1_C | Calc. and Reported MoietyFormula Strings Differ  | Please Check |
| PLAT234_ALERT_4_C | Large Hirshfeld Difference O3 --C9 .             | 0.17 Ang.    |
| PLAT234_ALERT_4_C | Large Hirshfeld Difference O4 --C11 .            | 0.18 Ang.    |
| PLAT234_ALERT_4_C | Large Hirshfeld Difference O5 --C13 .            | 0.19 Ang.    |
| PLAT241_ALERT_2_C | High 'MainMol' Ueq as Compared to Neighbors of   | O6 Check     |
| PLAT241_ALERT_2_C | High 'MainMol' Ueq as Compared to Neighbors of   | C16 Check    |
| PLAT242_ALERT_2_C | Low 'MainMol' Ueq as Compared to Neighbors of    | O4 Check     |
| PLAT242_ALERT_2_C | Low 'MainMol' Ueq as Compared to Neighbors of    | O5 Check     |
| PLAT242_ALERT_2_C | Low 'MainMol' Ueq as Compared to Neighbors of    | C15 Check    |
| PLAT260_ALERT_2_C | Large Average Ueq of Residue Including O3        | 0.189 Check  |
| PLAT342_ALERT_3_C | Low Bond Precision on C-C Bonds .....            | 0.01536 Ang. |
| PLAT906_ALERT_3_C | Large K Value in the Analysis of Variance .....  | 11.114 Check |
| PLAT906_ALERT_3_C | Large K Value in the Analysis of Variance .....  | 2.428 Check  |
| PLAT910_ALERT_3_C | Missing # of FCF Reflection(s) Below Theta(Min). | 9 Note       |
| PLAT976_ALERT_2_C | Check Calcd Resid. Dens. 1.08Ang From O6 .       | -0.47 eA-3   |

---

● **Alert level G**

|                   |                                                  |              |
|-------------------|--------------------------------------------------|--------------|
| PLAT002_ALERT_2_G | Number of Distance or Angle Restraints on AtSite | 15 Note      |
| PLAT003_ALERT_2_G | Number of Uiso or Uij Restrained non-H Atoms ... | 15 Report    |
| PLAT007_ALERT_5_G | Number of Unrefined Donor-H Atoms .....          | 4 Report     |
| PLAT012_ALERT_1_G | No _shelx_res_checksum Found in CIF .....        | Please Check |
| PLAT083_ALERT_2_G | SHELXL Second Parameter in WGHT Unusually Large  | 7.91 Why ?   |
| PLAT172_ALERT_4_G | The CIF-Embedded .res File Contains DFIX Records | 3 Report     |
| PLAT176_ALERT_4_G | The CIF-Embedded .res File Contains SADI Records | 3 Report     |
| PLAT177_ALERT_4_G | The CIF-Embedded .res File Contains DELU Records | 1 Report     |
| PLAT178_ALERT_4_G | The CIF-Embedded .res File Contains SIMU Records | 1 Report     |
| PLAT199_ALERT_1_G | Reported _cell_measurement_temperature .....     | 293 Check    |
| PLAT200_ALERT_1_G | Reported _diffrn_ambient_temperature .....       | 293 Check    |
| PLAT398_ALERT_2_G | Deviating C-O-C Angle From 120 for O5 .          | 107.8 Degree |
| PLAT860_ALERT_3_G | Number of Least-Squares Restraints .....         | 165 Note     |
| PLAT883_ALERT_1_G | No Info/Value for _atom_sites_solution_primary . | Please Do !  |
| PLAT912_ALERT_4_G | Missing # of FCF Reflections Above STh/L= 0.600  | 11 Note      |
| PLAT941_ALERT_3_G | Average HKL Measurement Multiplicity .....       | 3.0 Low      |
| PLAT967_ALERT_5_G | Note: Two-Theta Cutoff Value in Embedded .res .. | 51.0 Degree  |
| PLAT978_ALERT_2_G | Number C-C Bonds with Positive Residual Density. | 0 Info       |

---

0 **ALERT level A** = Most likely a serious problem - resolve or explain  
0 **ALERT level B** = A potentially serious problem, consider carefully  
15 **ALERT level C** = Check. Ensure it is not caused by an omission or oversight  
18 **ALERT level G** = General information/check it is not something unexpected

5 ALERT type 1 CIF construction/syntax error, inconsistent or missing data  
12 ALERT type 2 Indicator that the structure model may be wrong or deficient  
6 ALERT type 3 Indicator that the structure quality may be low  
8 ALERT type 4 Improvement, methodology, query or suggestion  
2 ALERT type 5 Informative message, check

---

It is advisable to attempt to resolve as many as possible of the alerts in all categories. Often the minor alerts point to easily fixed oversights, errors and omissions in your CIF or refinement strategy, so attention to these fine details can be worthwhile. In order to resolve some of the more serious problems it may be necessary to carry out additional measurements or structure refinements. However, the purpose of your study may justify the reported deviations and the more serious of these should normally be commented upon in the discussion or experimental section of a paper or in the "special\_details" fields of the CIF. checkCIF was carefully designed to identify outliers and unusual parameters, but every test has its limitations and alerts that are not important in a particular case may appear. Conversely, the absence of alerts does not guarantee there are no aspects of the results needing attention. It is up to the individual to critically assess their own results and, if necessary, seek expert advice.

### **Publication of your CIF in IUCr journals**

A basic structural check has been run on your CIF. These basic checks will be run on all CIFs submitted for publication in IUCr journals (*Acta Crystallographica*, *Journal of Applied Crystallography*, *Journal of Synchrotron Radiation*); however, if you intend to submit to *Acta Crystallographica Section C* or *E* or *IUCrData*, you should make sure that full publication checks are run on the final version of your CIF prior to submission.

### **Publication of your CIF in other journals**

Please refer to the *Notes for Authors* of the relevant journal for any special instructions relating to CIF submission.

---

**PLATON version of 06/07/2023; check.def file version of 30/06/2023**

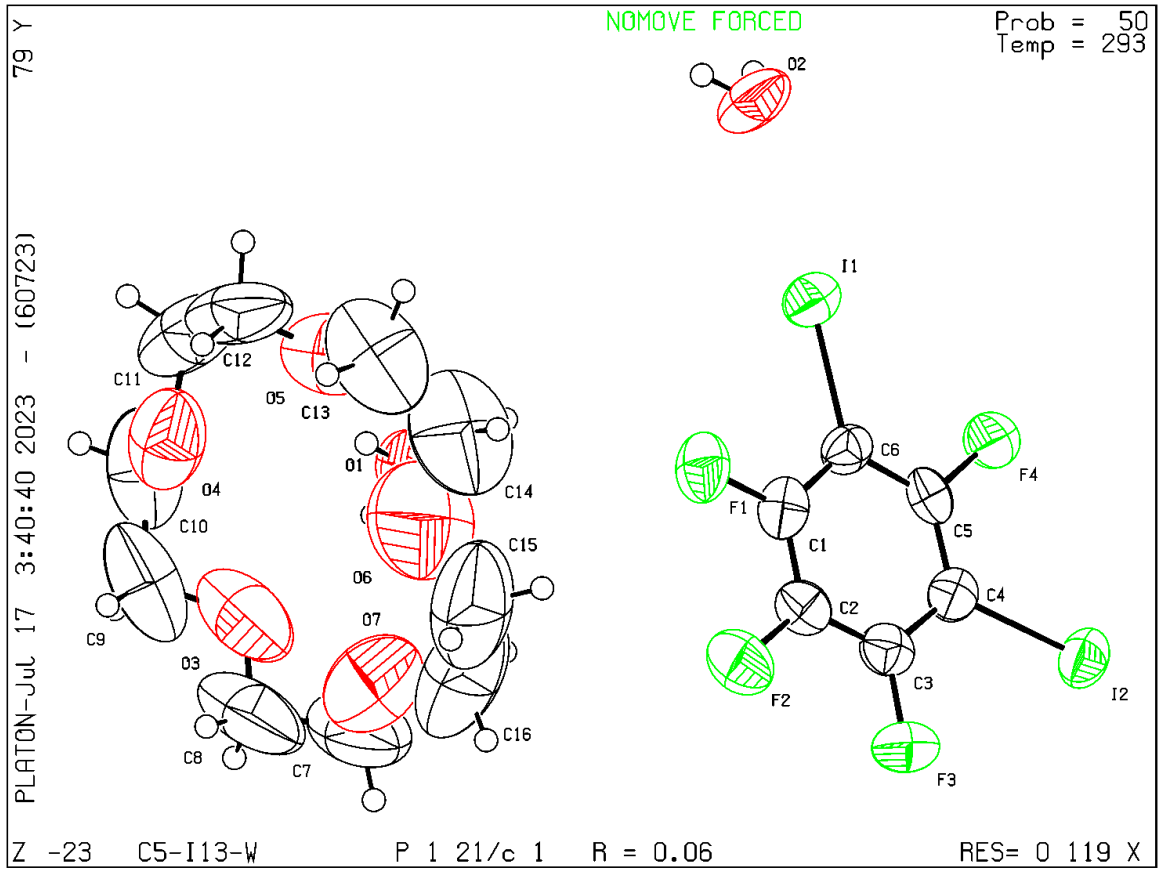

## checkCIF/PLATON report

Structure factors have been supplied for datablock(s) C5-I14

THIS REPORT IS FOR GUIDANCE ONLY. IF USED AS PART OF A REVIEW PROCEDURE FOR PUBLICATION, IT SHOULD NOT REPLACE THE EXPERTISE OF AN EXPERIENCED CRYSTALLOGRAPHIC REFEREE.

No syntax errors found. CIF dictionary Interpreting this report

### Datablock: C5-I14

---

Bond precision: C-C = 0.0121 Å Wavelength=0.71073

Cell: a=9.7355 (6) b=12.4217 (7) c=18.1787 (11)  
alpha=88.582 (5) beta=80.631 (5) gamma=78.136 (5)

Temperature: 296 K

|                        | Calculated           | Reported             |
|------------------------|----------------------|----------------------|
| Volume                 | 2122.6(2)            | 2122.6(2)            |
| Space group            | P -1                 | P -1                 |
| Hall group             | -P 1                 | -P 1                 |
| Moiety formula         | C10 H20 O5, C6 F4 I2 | C10 H20 O5, C6 F4 I2 |
| Sum formula            | C16 H20 F4 I2 O5     | C16 H20 F4 I2 O5     |
| Mr                     | 622.12               | 622.12               |
| Dx, g cm <sup>-3</sup> | 1.947                | 1.947                |
| Z                      | 4                    | 4                    |
| Mu (mm <sup>-1</sup> ) | 3.020                | 3.020                |
| F000                   | 1192.0               | 1192.0               |
| F000'                  | 1188.92              |                      |
| h, k, lmax             | 12, 15, 22           | 12, 15, 22           |
| Nref                   | 8676                 | 8657                 |
| Tmin, Tmax             | 0.545, 0.696         | 0.570, 0.713         |
| Tmin'                  | 0.525                |                      |

Correction method= # Reported T Limits: Tmin=0.570 Tmax=0.713  
AbsCorr = MULTI-SCAN

Data completeness= 0.998 Theta(max)= 26.372

R(reflections)= 0.0452( 5478)

wR2(reflections)=  
0.1042( 8657)

S = 0.997

Npar= 688

---

The following ALERTS were generated. Each ALERT has the format

**test-name\_ALERT\_alert-type\_alert-level.**

Click on the hyperlinks for more details of the test.

---

**Alert level B**

PLAT910\_ALERT\_3\_B Missing # of FCF Reflection(s) Below Theta(Min). 17 Note  
1 0 0, -1 1 0, 0 1 0, 1 1 0, -1 -1 1, 0 -1 1,  
1 -1 1, -1 0 1, 0 0 1, 1 0 1, 0 1 1, 1 1 1,  
0 -1 2, 0 0 2, 1 0 2, 0 1 2, 1 1 2,

**Author Response: The missing FCF reflections below theta(min) were caused by the high beamstop theta(min) limit set.**

---

**Alert level C**

PLAT234\_ALERT\_4\_C Large Hirshfeld Difference O8 --C27 . 0.21 Ang.  
PLAT234\_ALERT\_4\_C Large Hirshfeld Difference C23 --C24 . 0.18 Ang.  
PLAT241\_ALERT\_2\_C High 'MainMol' Ueq as Compared to Neighbors of C19 Check  
PLAT241\_ALERT\_2\_C High 'MainMol' Ueq as Compared to Neighbors of C25 Check  
PLAT241\_ALERT\_2\_C High 'MainMol' Ueq as Compared to Neighbors of C26 Check  
PLAT241\_ALERT\_2\_C High 'MainMol' Ueq as Compared to Neighbors of C27 Check  
PLAT242\_ALERT\_2\_C Low 'MainMol' Ueq as Compared to Neighbors of O1 Check  
PLAT242\_ALERT\_2\_C Low 'MainMol' Ueq as Compared to Neighbors of O4 Check  
PLAT242\_ALERT\_2\_C Low 'MainMol' Ueq as Compared to Neighbors of O7 Check  
PLAT242\_ALERT\_2\_C Low 'MainMol' Ueq as Compared to Neighbors of O8 Check  
PLAT242\_ALERT\_2\_C Low 'MainMol' Ueq as Compared to Neighbors of O9 Check  
PLAT260\_ALERT\_2\_C Large Average Ueq of Residue Including O6 0.125 Check  
PLAT334\_ALERT\_2\_C Small <C-C> Benzene Dist. C7 -C12 . 1.37 Ang.  
PLAT342\_ALERT\_3\_C Low Bond Precision on C-C Bonds ..... 0.0121 Ang.  
PLAT360\_ALERT\_2\_C Short C(sp3)-C(sp3) Bond C13 - C14 . 1.39 Ang.  
PLAT360\_ALERT\_2\_C Short C(sp3)-C(sp3) Bond C27 - C28 . 1.37 Ang.  
PLAT360\_ALERT\_2\_C Short C(sp3)-C(sp3) Bond C31 - C32 . 1.42 Ang.  
PLAT906\_ALERT\_3\_C Large K Value in the Analysis of Variance ..... 2.016 Check  
PLAT911\_ALERT\_3\_C Missing FCF Refl Between Thmin & STh/L= 0.600 2 Report  
8 -4 5, 9 -5 7,  
PLAT977\_ALERT\_2\_C Check Negative Difference Density on H14B . -0.43 eA-3

---

**Alert level G**

PLAT002\_ALERT\_2\_G Number of Distance or Angle Restraints on AtSite 48 Note  
PLAT003\_ALERT\_2\_G Number of Uiso or U(i,j) Restrained non-H Atoms 48 Report  
PLAT012\_ALERT\_1\_G N.O.K. \_shelx\_res\_checksum Found in CIF ..... Please Check  
PLAT154\_ALERT\_1\_G The s.u.'s on the Cell Angles are Equal ..(Note) 0.005 Degree  
PLAT168\_ALERT\_4\_G The CIF-Embedded .res File Contains EXYZ Records 2 Report  
PLAT171\_ALERT\_4\_G The CIF-Embedded .res File Contains EADP Records 2 Report  
PLAT175\_ALERT\_4\_G The CIF-Embedded .res File Contains SAME Records 2 Report  
PLAT178\_ALERT\_4\_G The CIF-Embedded .res File Contains SIMU Records 2 Report  
PLAT188\_ALERT\_3\_G A Non-default SIMU Restraint Value has been used 0.0100 Report  
PLAT188\_ALERT\_3\_G A Non-default SIMU Restraint Value has been used 0.0100 Report  
PLAT189\_ALERT\_3\_G A Non-default SAME Restraint Value for First Par 0.0100 Report  
PLAT189\_ALERT\_3\_G A Non-default SAME Restraint Value for SecondPar 0.0200 Report  
PLAT189\_ALERT\_3\_G A Non-default SAME Restraint Value for First Par 0.0100 Report



|                   |                                                            |  |        |        |
|-------------------|------------------------------------------------------------|--|--------|--------|
| PLAT189_ALERT_3_G | A Non-default SAME Restraint Value for SecondPar           |  | 0.0200 | Report |
| PLAT302_ALERT_4_G | Anion/Solvent/Minor-Residue Disorder (Resd 3)              |  | 100%   | Note   |
| PLAT302_ALERT_4_G | Anion/Solvent/Minor-Residue Disorder (Resd 4)              |  | 100%   | Note   |
| PLAT302_ALERT_4_G | Anion/Solvent/Minor-Residue Disorder (Resd 5)              |  | 100%   | Note   |
| PLAT302_ALERT_4_G | Anion/Solvent/Minor-Residue Disorder (Resd 6)              |  | 100%   | Note   |
| PLAT304_ALERT_4_G | Non-Integer Number of Atoms in ..... (Resd 3)              |  | 6.98   | Check  |
| PLAT304_ALERT_4_G | Non-Integer Number of Atoms in ..... (Resd 4)              |  | 8.24   | Check  |
| PLAT304_ALERT_4_G | Non-Integer Number of Atoms in ..... (Resd 5)              |  | 5.02   | Check  |
| PLAT304_ALERT_4_G | Non-Integer Number of Atoms in ..... (Resd 6)              |  | 3.76   | Check  |
| PLAT811_ALERT_5_G | No ADDSYM Analysis: Too Many Excluded Atoms ....           |  |        | ! Info |
| PLAT860_ALERT_3_G | Number of Least-Squares Restraints .....                   |  | 684    | Note   |
| PLAT941_ALERT_3_G | Average HKL Measurement Multiplicity .....                 |  | 2.1    | Low    |
| PLAT969_ALERT_5_G | The 'Henn et al.' R-Factor-gap value .....                 |  | 2.194  | Note   |
|                   | Predicted wR2: Based on SigI**2 4.75 or SHELX Weight 10.46 |  |        |        |
| PLAT978_ALERT_2_G | Number C-C Bonds with Positive Residual Density.           |  |        | 4 Info |

---

0 **ALERT level A** = Most likely a serious problem - resolve or explain  
 1 **ALERT level B** = A potentially serious problem, consider carefully  
 20 **ALERT level C** = Check. Ensure it is not caused by an omission or oversight  
 27 **ALERT level G** = General information/check it is not something unexpected

2 ALERT type 1 CIF construction/syntax error, inconsistent or missing data  
 18 ALERT type 2 Indicator that the structure model may be wrong or deficient  
 12 ALERT type 3 Indicator that the structure quality may be low  
 14 ALERT type 4 Improvement, methodology, query or suggestion  
 2 ALERT type 5 Informative message, check

---

It is advisable to attempt to resolve as many as possible of the alerts in all categories. Often the minor alerts point to easily fixed oversights, errors and omissions in your CIF or refinement strategy, so attention to these fine details can be worthwhile. In order to resolve some of the more serious problems it may be necessary to carry out additional measurements or structure refinements. However, the purpose of your study may justify the reported deviations and the more serious of these should normally be commented upon in the discussion or experimental section of a paper or in the "special\_details" fields of the CIF. checkCIF was carefully designed to identify outliers and unusual parameters, but every test has its limitations and alerts that are not important in a particular case may appear. Conversely, the absence of alerts does not guarantee there are no aspects of the results needing attention. It is up to the individual to critically assess their own results and, if necessary, seek expert advice.

### **Publication of your CIF in IUCr journals**

A basic structural check has been run on your CIF. These basic checks will be run on all CIFs submitted for publication in IUCr journals (*Acta Crystallographica*, *Journal of Applied Crystallography*, *Journal of Synchrotron Radiation*); however, if you intend to submit to *Acta Crystallographica Section C* or *E* or *IUCrData*, you should make sure that full publication checks are run on the final version of your CIF prior to submission.

### **Publication of your CIF in other journals**

Please refer to the *Notes for Authors* of the relevant journal for any special instructions relating to CIF submission.

---

**PLATON version of 22/08/2024; check.def file version of 21/08/2024**

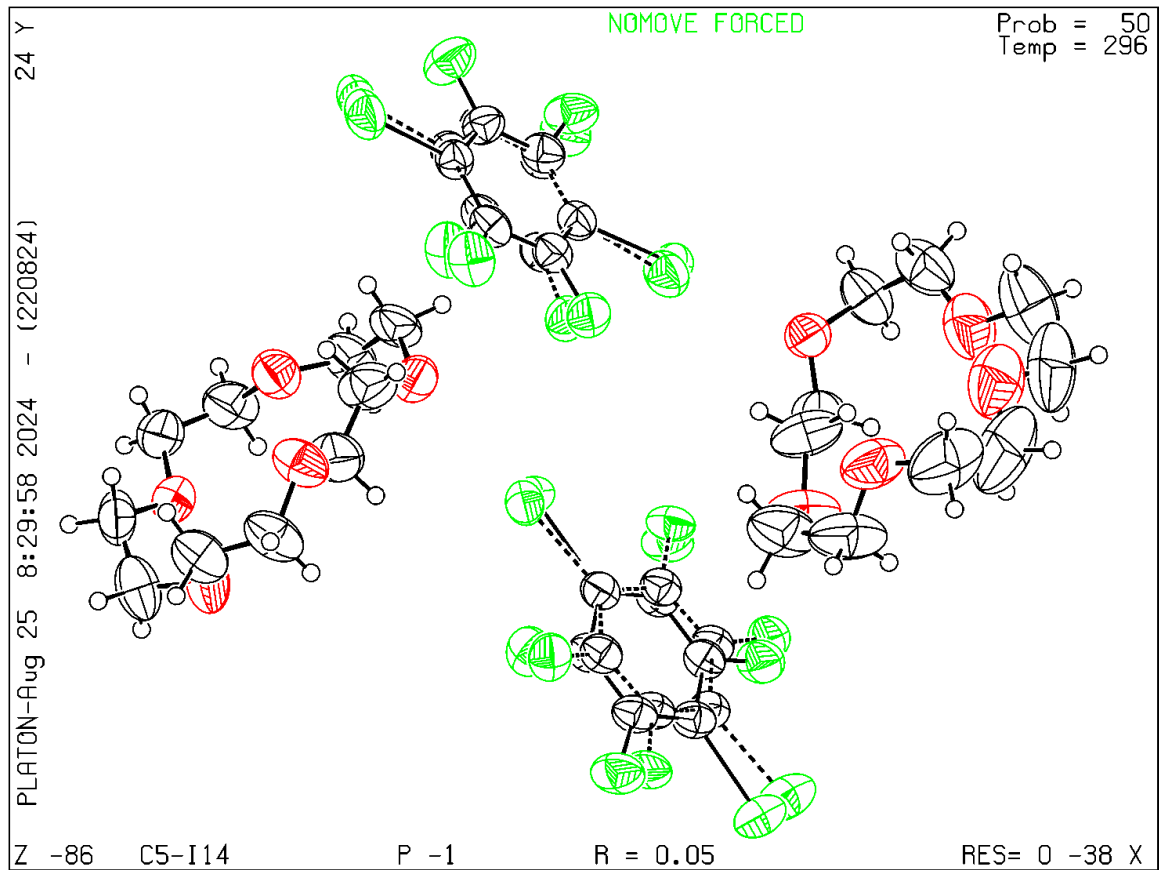

## checkCIF/PLATON report

Structure factors have been supplied for datablock(s) C5-I135

THIS REPORT IS FOR GUIDANCE ONLY. IF USED AS PART OF A REVIEW PROCEDURE FOR PUBLICATION, IT SHOULD NOT REPLACE THE EXPERTISE OF AN EXPERIENCED CRYSTALLOGRAPHIC REFEREE.

No syntax errors found.      CIF dictionary      Interpreting this report

### Datablock: C5-I135

---

Bond precision:      C-C = 0.0185 A      Wavelength=0.71073

Cell:                      a=16.1779(9)      b=8.4631(4)      c=25.3518(15)  
                                    alpha=90      beta=105.819(6)      gamma=90

Temperature:      295 K

|                        | Calculated              | Reported                |
|------------------------|-------------------------|-------------------------|
| Volume                 | 3339.6(3)               | 3339.6(3)               |
| Space group            | C c                     | C 1 c 1                 |
| Hall group             | C -2yc                  | C -2yc                  |
| Moiety formula         | C10 H20 O5, 2(C6 F3 I3) | C10 H20 O5, 2(C6 F3 I3) |
| Sum formula            | C22 H20 F6 I6 O5        | C22 H20 F6 I6 O5        |
| Mr                     | 1239.78                 | 1239.78                 |
| Dx, g cm <sup>-3</sup> | 2.466                   | 2.466                   |
| Z                      | 4                       | 4                       |
| Mu (mm <sup>-1</sup> ) | 5.643                   | 5.643                   |
| F000                   | 2256.0                  | 2256.0                  |
| F000'                  | 2245.88                 |                         |
| h, k, lmax             | 22, 11, 34              | 22, 10, 33              |
| Nref                   | 8963[ 4484]             | 6986                    |
| Tmin, Tmax             | 0.175, 0.244            | 0.546, 1.000            |
| Tmin'                  | 0.143                   |                         |

Correction method= # Reported T Limits: Tmin=0.546 Tmax=1.000  
AbsCorr = MULTI-SCAN

Data completeness= 1.56/0.78      Theta(max)= 29.066

R(reflections)= 0.0364( 5822)

wR2(reflections)=  
0.0727( 6986)

S = 1.028

Npar= 643

The following ALERTS were generated. Each ALERT has the format

**test-name\_ALERT\_alert-type\_alert-level.**

Click on the hyperlinks for more details of the test.

### Alert level C

|                   |                                                  |        |      |
|-------------------|--------------------------------------------------|--------|------|
| PLAT090_ALERT_3_C | Poor Data / Parameter Ratio (Zmax > 18) .....    | 6.17   | Note |
| PLAT342_ALERT_3_C | Low Bond Precision on C-C Bonds .....            | 0.0185 | Ang. |
| PLAT910_ALERT_3_C | Missing # of FCF Reflection(s) Below Theta(Min). | 7      | Note |
|                   | 1 1 0, 2 0 0, -1 1 1, 1 1 1, -2 0 2, -1 1 2,     |        |      |
|                   | 0 0 2,                                           |        |      |

### Alert level G

|                   |                                                  |          |              |
|-------------------|--------------------------------------------------|----------|--------------|
| PLAT002_ALERT_2_G | Number of Distance or Angle Restraints on AtSite | 68       | Note         |
| PLAT003_ALERT_2_G | Number of Uiso or U(i,j) Restrained non-H Atoms  | 66       | Report       |
| PLAT012_ALERT_1_G | N.O.K. _shelx_res_checksum Found in CIF .....    |          | Please Check |
| PLAT013_ALERT_1_G | N.O.K. _shelx_hkl_checksum Found in CIF .....    |          | Please Check |
| PLAT172_ALERT_4_G | The CIF-Embedded .res File Contains DFIX Records | 1        | Report       |
| PLAT174_ALERT_4_G | The CIF-Embedded .res File Contains FLAT Records | 1        | Report       |
| PLAT175_ALERT_4_G | The CIF-Embedded .res File Contains SAME Records | 3        | Report       |
| PLAT178_ALERT_4_G | The CIF-Embedded .res File Contains SIMU Records | 3        | Report       |
| PLAT188_ALERT_3_G | A Non-default SIMU Restraint Value has been used | 0.0100   | Report       |
| PLAT188_ALERT_3_G | A Non-default SIMU Restraint Value has been used | 0.0100   | Report       |
| PLAT188_ALERT_3_G | A Non-default SIMU Restraint Value has been used | 0.0100   | Report       |
| PLAT189_ALERT_3_G | A Non-default SAME Restraint Value for First Par | 0.0100   | Report       |
| PLAT189_ALERT_3_G | A Non-default SAME Restraint Value for SecondPar | 0.0200   | Report       |
| PLAT189_ALERT_3_G | A Non-default SAME Restraint Value for First Par | 0.0100   | Report       |
| PLAT189_ALERT_3_G | A Non-default SAME Restraint Value for SecondPar | 0.0200   | Report       |
| PLAT189_ALERT_3_G | A Non-default SAME Restraint Value for First Par | 0.0100   | Report       |
| PLAT189_ALERT_3_G | A Non-default SAME Restraint Value for SecondPar | 0.0200   | Report       |
| PLAT301_ALERT_3_G | Main Residue Disorder .....                      | (Resd 1) | 53% Note     |
| PLAT302_ALERT_4_G | Anion/Solvent/Minor-Residue Disorder (Resd 2)    | 100%     | Note         |
| PLAT302_ALERT_4_G | Anion/Solvent/Minor-Residue Disorder (Resd 3)    | 100%     | Note         |
| PLAT302_ALERT_4_G | Anion/Solvent/Minor-Residue Disorder (Resd 4)    | 100%     | Note         |
| PLAT302_ALERT_4_G | Anion/Solvent/Minor-Residue Disorder (Resd 5)    | 100%     | Note         |
| PLAT304_ALERT_4_G | Non-Integer Number of Atoms in .....             | (Resd 2) | 6.48 Check   |
| PLAT304_ALERT_4_G | Non-Integer Number of Atoms in .....             | (Resd 3) | 8.88 Check   |
| PLAT304_ALERT_4_G | Non-Integer Number of Atoms in .....             | (Resd 4) | 5.52 Check   |
| PLAT304_ALERT_4_G | Non-Integer Number of Atoms in .....             | (Resd 5) | 3.12 Check   |
| PLAT398_ALERT_2_G | Deviating C-O-C Angle From 120 for O2            | .        | 108.3 Degree |
| PLAT398_ALERT_2_G | Deviating C-O-C Angle From 120 for O2A           | .        | 106.4 Degree |
| PLAT410_ALERT_2_G | Short Intra H...H Contact H7B ..H6AB             | .        | 2.11 Ang.    |
|                   | x,y,z =                                          | 1_555    | Check        |
| PLAT720_ALERT_4_G | Number of Unusual/Non-Standard Labels .....      |          | 12 Note      |
|                   | H1AA H1AB H2AA H2AB H3AA H3AB H4AA H4AB          |          |              |
|                   | H5AA H5AB H6AA H6AB                              |          |              |
| PLAT721_ALERT_1_G | Bond Calc 0.96000, Rep 0.97000 Dev...            |          | 0.01 Ang.    |
|                   | C2A -H2AA 1_555 1_555 .....                      | #        | 41 Check     |
| PLAT721_ALERT_1_G | Bond Calc 0.96000, Rep 0.97000 Dev...            |          | 0.01 Ang.    |
|                   | C4A -H4AA 1_555 1_555 .....                      | #        | 48 Check     |
| PLAT722_ALERT_1_G | Angle Calc 110.00, Rep 108.80 Dev...             |          | 1.20 Degree  |
|                   | C2A -C1A -H1AA 1_555 1_555 1_555                 | #        | 72 Check     |
| PLAT811_ALERT_5_G | No ADDSYM Analysis: Too Many Excluded Atoms .... |          | ! Info       |
| PLAT860_ALERT_3_G | Number of Least-Squares Restraints .....         |          | 908 Note     |
| PLAT912_ALERT_4_G | Missing # of FCF Reflections Above STh/L= 0.600  |          | 446 Note     |

|                                                                    |            |
|--------------------------------------------------------------------|------------|
| PLAT915_ALERT_3_G No Flack x Check Done: Low Friedel Pair Coverage | 67 %       |
| PLAT941_ALERT_3_G Average HKL Measurement Multiplicity .....       | 2.8 Low    |
| PLAT969_ALERT_5_G The 'Henn et al.' R-Factor-gap value .....       | 1.618 Note |
| Predicted wR2: Based on SigI**2 4.50 or SHELX Weight               | 7.07       |
| PLAT978_ALERT_2_G Number C-C Bonds with Positive Residual Density. | 1 Info     |

---

0 **ALERT level A** = Most likely a serious problem - resolve or explain  
0 **ALERT level B** = A potentially serious problem, consider carefully  
3 **ALERT level C** = Check. Ensure it is not caused by an omission or oversight  
40 **ALERT level G** = General information/check it is not something unexpected

5 ALERT type 1 CIF construction/syntax error, inconsistent or missing data  
6 ALERT type 2 Indicator that the structure model may be wrong or deficient  
16 ALERT type 3 Indicator that the structure quality may be low  
14 ALERT type 4 Improvement, methodology, query or suggestion  
2 ALERT type 5 Informative message, check

---

It is advisable to attempt to resolve as many as possible of the alerts in all categories. Often the minor alerts point to easily fixed oversights, errors and omissions in your CIF or refinement strategy, so attention to these fine details can be worthwhile. In order to resolve some of the more serious problems it may be necessary to carry out additional measurements or structure refinements. However, the purpose of your study may justify the reported deviations and the more serious of these should normally be commented upon in the discussion or experimental section of a paper or in the "special\_details" fields of the CIF. checkCIF was carefully designed to identify outliers and unusual parameters, but every test has its limitations and alerts that are not important in a particular case may appear. Conversely, the absence of alerts does not guarantee there are no aspects of the results needing attention. It is up to the individual to critically assess their own results and, if necessary, seek expert advice.

### Publication of your CIF in IUCr journals

A basic structural check has been run on your CIF. These basic checks will be run on all CIFs submitted for publication in IUCr journals (*Acta Crystallographica*, *Journal of Applied Crystallography*, *Journal of Synchrotron Radiation*); however, if you intend to submit to *Acta Crystallographica Section C* or *E* or *IUCrData*, you should make sure that full publication checks are run on the final version of your CIF prior to submission.

### Publication of your CIF in other journals

Please refer to the *Notes for Authors* of the relevant journal for any special instructions relating to CIF submission.

---

**PLATON version of 22/08/2024; check.def file version of 21/08/2024**

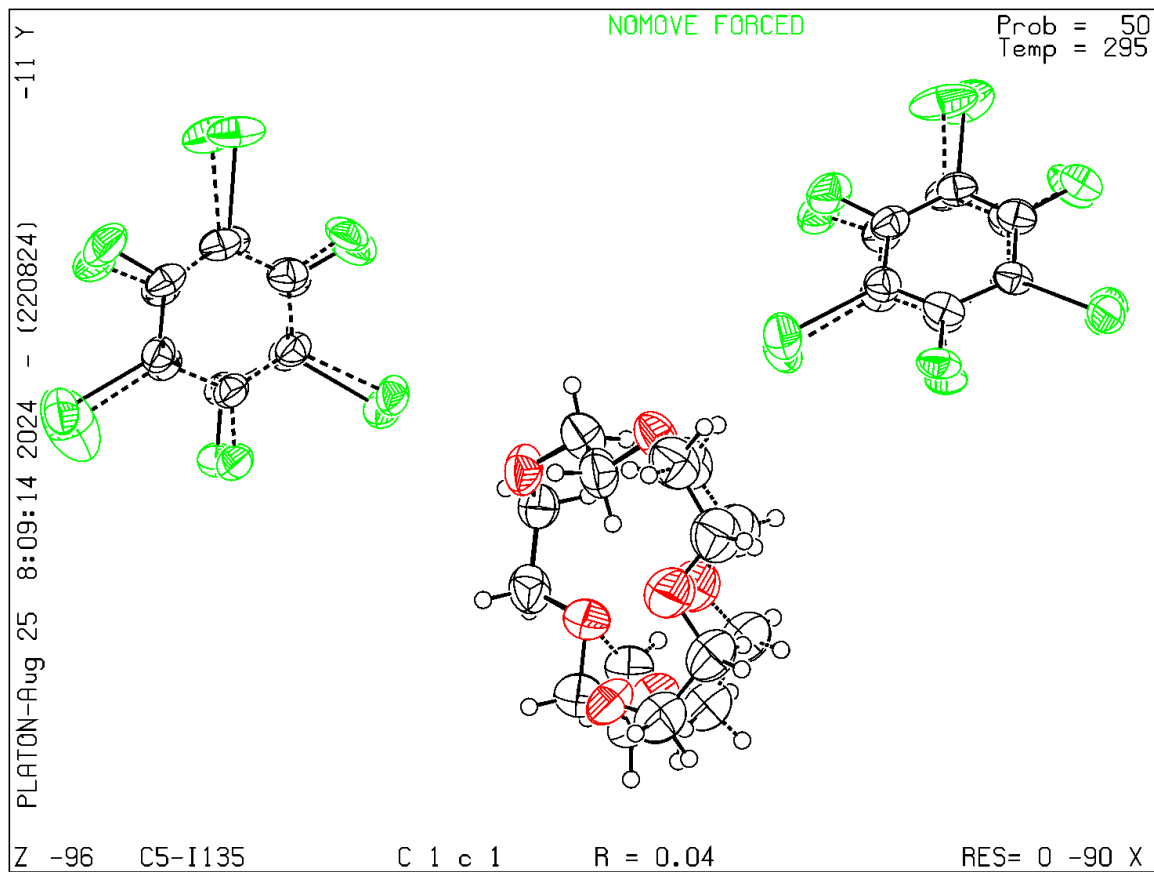

## checkCIF/PLATON report

Structure factors have been supplied for datablock(s) C6-I12-W

THIS REPORT IS FOR GUIDANCE ONLY. IF USED AS PART OF A REVIEW PROCEDURE FOR PUBLICATION, IT SHOULD NOT REPLACE THE EXPERTISE OF AN EXPERIENCED CRYSTALLOGRAPHIC REFEREE.

No syntax errors found.      CIF dictionary      Interpreting this report

### Datablock: C6-I12-W

---

Bond precision:    C-C = 0.0084 Å

Wavelength=0.71073

Cell:                a=7.6327(5)                b=8.0627(6)                c=15.0373(12)  
                       alpha=88.108(6)            beta=77.223(6)            gamma=89.966(6)  
 Temperature:      295 K

|                        | Calculated                          | Reported                            |
|------------------------|-------------------------------------|-------------------------------------|
| Volume                 | 901.97(12)                          | 901.97(12)                          |
| Space group            | P -1                                | P -1                                |
| Hall group             | -P 1                                | -P 1                                |
| Moiety formula         | C12 H24 O6, 2(C6 F4 I2),<br>4(H2 O) | C12 H24 O6, 2(C6 F4 I2),<br>4(H2 O) |
| Sum formula            | C24 H32 F8 I4 O10                   | C24 H32 F8 I4 O10                   |
| Mr                     | 1140.10                             | 1140.09                             |
| Dx, g cm <sup>-3</sup> | 2.099                               | 2.099                               |
| Z                      | 1                                   | 1                                   |
| Mu (mm <sup>-1</sup> ) | 3.543                               | 3.543                               |
| F000                   | 540.0                               | 540.0                               |
| F000'                  | 538.45                              |                                     |
| h, k, lmax             | 10, 10, 20                          | 10, 10, 20                          |
| Nref                   | 4718                                | 4051                                |
| Tmin, Tmax             | 0.264, 0.492                        | 0.331, 0.538                        |
| Tmin'                  | 0.222                               |                                     |

Correction method= # Reported T Limits: Tmin=0.331 Tmax=0.538  
 AbsCorr = MULTI-SCAN

Data completeness= 0.859

Theta(max)= 28.832

R(reflections)= 0.0435( 2906)

wR2(reflections)=  
0.0994( 4051)

S = 1.055

Npar= 209



---

The following ALERTS were generated. Each ALERT has the format

**test-name\_ALERT\_alert-type\_alert-level.**

Click on the hyperlinks for more details of the test.

---

**Alert level C**

PLAT334\_ALERT\_2\_C Small <C-C> Benzene Dist. C1 -C6 . 1.37 Ang.  
PLAT342\_ALERT\_3\_C Low Bond Precision on C-C Bonds ..... 0.00844 Ang.  
PLAT355\_ALERT\_3\_C Long O-H (X0.82,N0.98A) O5 - H5B . 1.05 Ang.  
PLAT906\_ALERT\_3\_C Large K Value in the Analysis of Variance ..... 3.032 Check  
PLAT906\_ALERT\_3\_C Large K Value in the Analysis of Variance ..... 2.116 Check  
PLAT910\_ALERT\_3\_C Missing # of FCF Reflection(s) Below Theta(Min). 7 Note  
1 0 0, 0 1 0, 0 -1 1, 0 0 1, 1 0 1, 0 1 1,  
0 0 2,  
PLAT911\_ALERT\_3\_C Missing FCF Refl Between Thmin & STh/L= 0.600 12 Report  
7 -1 8, 7 -1 9, 4 -2 11, 5 -1 11, 6 -1 11, 5 -2 13,  
5 -2 14, 6 2 14, 6 3 14, 6 1 15, 6 2 15, 5 -2 16,

---

**Alert level G**

PLAT002\_ALERT\_2\_G Number of Distance or Angle Restraints on AtSite 3 Note  
PLAT007\_ALERT\_5\_G Number of Unrefined Donor-H Atoms ..... 4 Report  
H4A H4B H5A H5B  
PLAT012\_ALERT\_1\_G N.O.K. \_shelx\_res\_checksum Found in CIF ..... Please Check  
PLAT154\_ALERT\_1\_G The s.u.'s on the Cell Angles are Equal ..(Note) 0.006 Degree  
PLAT172\_ALERT\_4\_G The CIF-Embedded .res File Contains DFIX Records 2 Report  
PLAT790\_ALERT\_4\_G Centre of Gravity not Within Unit Cell: Resd. # 4 Note  
H2 O  
PLAT860\_ALERT\_3\_G Number of Least-Squares Restraints ..... 2 Note  
PLAT912\_ALERT\_4\_G Missing # of FCF Reflections Above STh/L= 0.600 648 Note  
PLAT933\_ALERT\_2\_G Number of HKL-OMIT Records in Embedded .res File 8 Note  
6 4 14, 6 0 16, 8 4 14, 6 2 14, 6 3 14, 6 5 15,  
6 1 15, 5 -2 14,  
PLAT941\_ALERT\_3\_G Average HKL Measurement Multiplicity ..... 1.7 Low  
PLAT969\_ALERT\_5\_G The 'Henn et al.' R-Factor-gap value ..... 2.349 Note  
Predicted wR2: Based on SigI\*\*2 4.23 or SHELX Weight 9.42  
PLAT978\_ALERT\_2\_G Number C-C Bonds with Positive Residual Density. 0 Info

---

0 **ALERT level A** = Most likely a serious problem - resolve or explain  
0 **ALERT level B** = A potentially serious problem, consider carefully  
7 **ALERT level C** = Check. Ensure it is not caused by an omission or oversight  
12 **ALERT level G** = General information/check it is not something unexpected

2 ALERT type 1 CIF construction/syntax error, inconsistent or missing data  
4 ALERT type 2 Indicator that the structure model may be wrong or deficient  
8 ALERT type 3 Indicator that the structure quality may be low  
3 ALERT type 4 Improvement, methodology, query or suggestion  
2 ALERT type 5 Informative message, check

---

It is advisable to attempt to resolve as many as possible of the alerts in all categories. Often the minor alerts point to easily fixed oversights, errors and omissions in your CIF or refinement strategy, so attention to these fine details can be worthwhile. In order to resolve some of the more serious problems it may be necessary to carry out additional measurements or structure refinements. However, the purpose of your study may justify the reported deviations and the more serious of these should normally be commented upon in the discussion or experimental section of a paper or in the "special\_details" fields of the CIF. checkCIF was carefully designed to identify outliers and unusual parameters, but every test has its limitations and alerts that are not important in a particular case may appear. Conversely, the absence of alerts does not guarantee there are no aspects of the results needing attention. It is up to the individual to critically assess their own results and, if necessary, seek expert advice.

### **Publication of your CIF in IUCr journals**

A basic structural check has been run on your CIF. These basic checks will be run on all CIFs submitted for publication in IUCr journals (*Acta Crystallographica*, *Journal of Applied Crystallography*, *Journal of Synchrotron Radiation*); however, if you intend to submit to *Acta Crystallographica Section C* or *E* or *IUCrData*, you should make sure that full publication checks are run on the final version of your CIF prior to submission.

### **Publication of your CIF in other journals**

Please refer to the *Notes for Authors* of the relevant journal for any special instructions relating to CIF submission.

---

**PLATON version of 22/08/2024; check.def file version of 21/08/2024**

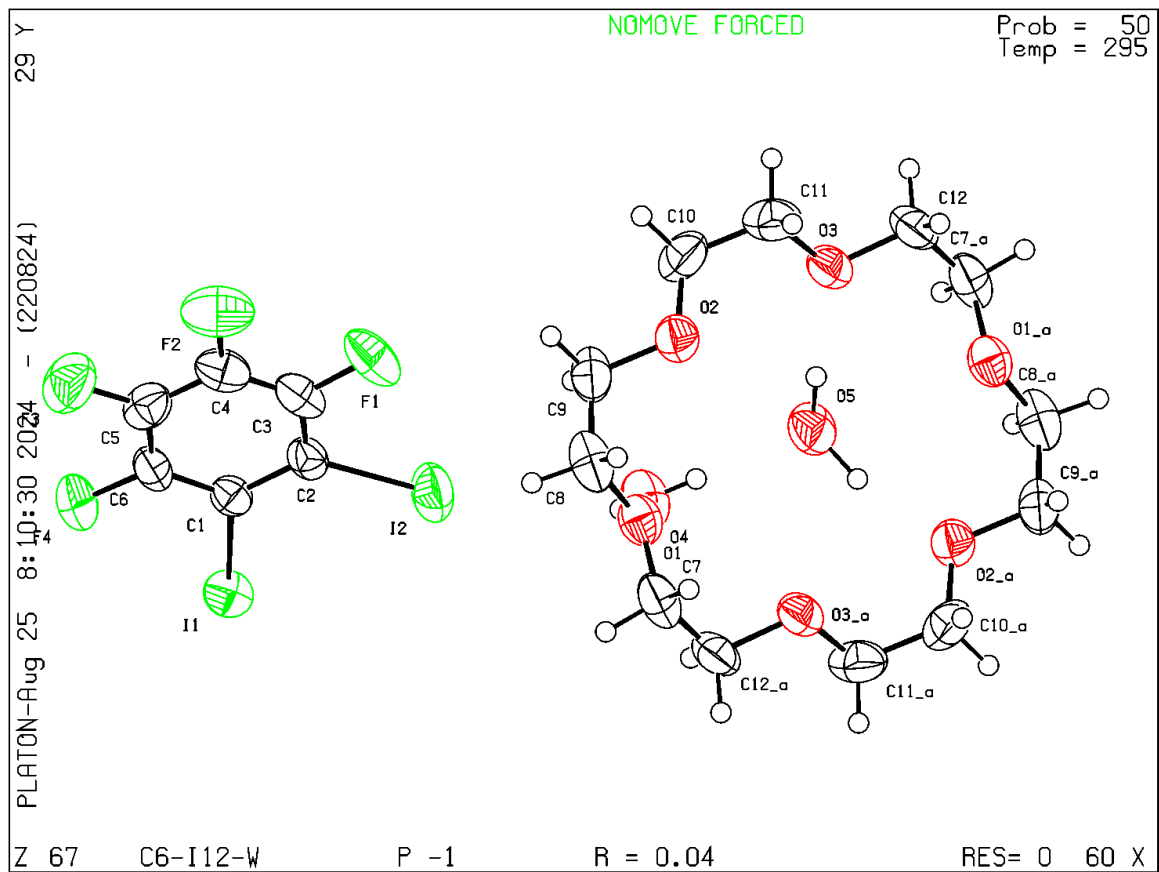



---

The following ALERTS were generated. Each ALERT has the format

**test-name\_ALERT\_alert-type\_alert-level.**

Click on the hyperlinks for more details of the test.

---

 **Alert level A**

PLAT431\_ALERT\_2\_A Short Inter HL..A Contact I2 ..01 . 2.94 Ang.  
x,y,z = 1\_555 Check

**Author Response: The Checkcif software has a bug and cannot identify the halogen bond.**

---

 **Alert level C**

PLAT199\_ALERT\_1\_C Reported \_cell\_measurement\_temperature ..... (K) 293 Check  
PLAT200\_ALERT\_1\_C Reported \_diffrn\_ambient\_temperature ..... (K) 293 Check  
PLAT242\_ALERT\_2\_C Low 'MainMol' Ueq as Compared to Neighbors of C6 Check  
PLAT334\_ALERT\_2\_C Small <C-C> Benzene Dist. C1 -C6 . 1.37 Ang.  
PLAT342\_ALERT\_3\_C Low Bond Precision on C-C Bonds ..... 0.00922 Ang.  
PLAT906\_ALERT\_3\_C Large K Value in the Analysis of Variance ..... 15.372 Check  
PLAT906\_ALERT\_3\_C Large K Value in the Analysis of Variance ..... 2.775 Check  
PLAT910\_ALERT\_3\_C Missing # of FCF Reflection(s) Below Theta(Min). 8 Note

---

 **Alert level G**

PLAT005\_ALERT\_5\_G No Embedded Refinement Details Found in the CIF Please Do !  
PLAT045\_ALERT\_1\_G Calculated and Reported Z Differ by a Factor ... 0.500 Check  
PLAT431\_ALERT\_2\_G Short Inter HL..A Contact I1 ..03 . 3.14 Ang.  
1/2+x,y,1/2-z = 6\_656 Check

**Author Response: The Checkcif software has a bug and cannot identify the halogen bond.**

---

PLAT899\_ALERT\_4\_G SHELXL-97 is Deprecated and Succeeded by SHELXL 2019/3 Note  
PLAT912\_ALERT\_4\_G Missing # of FCF Reflections Above STh/L= 0.600 12 Note  
PLAT955\_ALERT\_1\_G Reported (CIF) and Actual (FCF) Lmax Differ by . 1 Units  
PLAT978\_ALERT\_2\_G Number C-C Bonds with Positive Residual Density. 1 Info

---

- 1 **ALERT level A** = Most likely a serious problem - resolve or explain  
0 **ALERT level B** = A potentially serious problem, consider carefully  
8 **ALERT level C** = Check. Ensure it is not caused by an omission or oversight  
7 **ALERT level G** = General information/check it is not something unexpected
- 4 ALERT type 1 CIF construction/syntax error, inconsistent or missing data  
5 ALERT type 2 Indicator that the structure model may be wrong or deficient  
4 ALERT type 3 Indicator that the structure quality may be low  
2 ALERT type 4 Improvement, methodology, query or suggestion  
1 ALERT type 5 Informative message, check
-

It is advisable to attempt to resolve as many as possible of the alerts in all categories. Often the minor alerts point to easily fixed oversights, errors and omissions in your CIF or refinement strategy, so attention to these fine details can be worthwhile. In order to resolve some of the more serious problems it may be necessary to carry out additional measurements or structure refinements. However, the purpose of your study may justify the reported deviations and the more serious of these should normally be commented upon in the discussion or experimental section of a paper or in the "special\_details" fields of the CIF. checkCIF was carefully designed to identify outliers and unusual parameters, but every test has its limitations and alerts that are not important in a particular case may appear. Conversely, the absence of alerts does not guarantee there are no aspects of the results needing attention. It is up to the individual to critically assess their own results and, if necessary, seek expert advice.

### **Publication of your CIF in IUCr journals**

A basic structural check has been run on your CIF. These basic checks will be run on all CIFs submitted for publication in IUCr journals (*Acta Crystallographica*, *Journal of Applied Crystallography*, *Journal of Synchrotron Radiation*); however, if you intend to submit to *Acta Crystallographica Section C* or *E* or *IUCrData*, you should make sure that full publication checks are run on the final version of your CIF prior to submission.

### **Publication of your CIF in other journals**

Please refer to the *Notes for Authors* of the relevant journal for any special instructions relating to CIF submission.

---

**PLATON version of 06/07/2023; check.def file version of 30/06/2023**

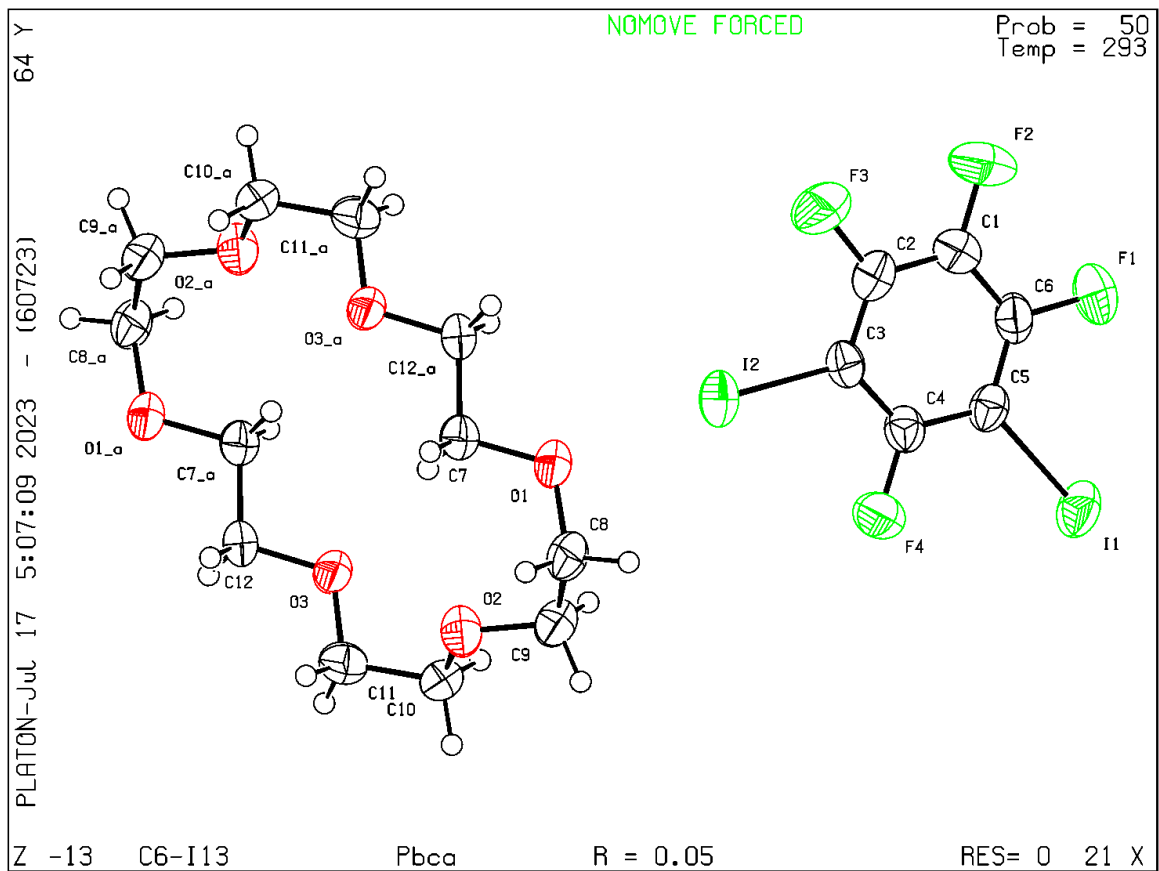

## checkCIF/PLATON report

Structure factors have been supplied for datablock(s) C6-I14

THIS REPORT IS FOR GUIDANCE ONLY. IF USED AS PART OF A REVIEW PROCEDURE FOR PUBLICATION, IT SHOULD NOT REPLACE THE EXPERTISE OF AN EXPERIENCED CRYSTALLOGRAPHIC REFEREE.

No syntax errors found. CIF dictionary Interpreting this report

### Datablock: C6-I14

---

Bond precision: C-C = 0.0033 A Wavelength=0.71073  
Cell: a=14.2455 (5) b=10.6548 (5) c=15.5033 (5)  
alpha=90 beta=94.012 (3) gamma=90  
Temperature: 296 K

|                        | Calculated           | Reported             |
|------------------------|----------------------|----------------------|
| Volume                 | 2347.37 (16)         | 2347.37 (16)         |
| Space group            | I 2/a                | I 1 2/a 1            |
| Hall group             | -I 2ya               | -I 2ya               |
| Moiety formula         | C12 H24 O6, C6 F4 I2 | C12 H24 O6, C6 F4 I2 |
| Sum formula            | C18 H24 F4 I2 O6     | C18 H24 F4 I2 O6     |
| Mr                     | 666.17               | 666.17               |
| Dx, g cm <sup>-3</sup> | 1.885                | 1.885                |
| Z                      | 4                    | 4                    |
| Mu (mm <sup>-1</sup> ) | 2.741                | 2.741                |
| F000                   | 1288.0               | 1288.0               |
| F000'                  | 1284.98              |                      |
| h, k, lmax             | 19, 14, 21           | 19, 14, 20           |
| Nref                   | 3198                 | 2841                 |
| Tmin, Tmax             | 0.398, 0.562         | 0.656, 1.000         |
| Tmin'                  | 0.368                |                      |

Correction method= # Reported T Limits: Tmin=0.656 Tmax=1.000  
AbsCorr = MULTI-SCAN

Data completeness= 0.888 Theta(max)= 29.232

R(reflections)= 0.0268 ( 2552) wR2(reflections)=  
0.0544 ( 2841)

S = 1.059 Npar= 145



---

The following ALERTS were generated. Each ALERT has the format

**test-name\_ALERT\_alert-type\_alert-level.**

Click on the hyperlinks for more details of the test.

---

**Alert level C**

|                   |                                                 |       |       |
|-------------------|-------------------------------------------------|-------|-------|
| PLAT250_ALERT_2_C | Large U3/U1 Ratio for <U(i,j)> Tensor(Resd 2)   | 2.1   | Note  |
| PLAT906_ALERT_3_C | Large K Value in the Analysis of Variance ..... | 3.002 | Check |

---

**Alert level G**

|                   |                                                      |       |              |
|-------------------|------------------------------------------------------|-------|--------------|
| PLAT012_ALERT_1_G | N.O.K. _shelx_res_checksum Found in CIF .....        |       | Please Check |
| PLAT013_ALERT_1_G | N.O.K. _shelx_hkl_checksum Found in CIF .....        |       | Please Check |
| PLAT164_ALERT_4_G | Nr. of Refined C-H H-Atoms in Heavy-Atom Struct.     | 2     | Note         |
| PLAT431_ALERT_2_G | Short Inter HL..A Contact I1 ..01 .                  | 3.06  | Ang.         |
|                   | x,y,z =                                              | 1_555 | Check        |
| PLAT910_ALERT_3_G | Missing # of FCF Reflection(s) Below Theta(Min).     | 4     | Note         |
|                   | 1 1 0, 2 0 0, 0 1 1, 0 0 2,                          |       |              |
| PLAT912_ALERT_4_G | Missing # of FCF Reflections Above STh/L= 0.600      | 347   | Note         |
| PLAT933_ALERT_2_G | Number of HKL-OMIT Records in Embedded .res File     | 1     | Note         |
|                   | 0 2 0,                                               |       |              |
| PLAT941_ALERT_3_G | Average HKL Measurement Multiplicity .....           | 4.5   | Low          |
| PLAT969_ALERT_5_G | The 'Henn et al.' R-Factor-gap value .....           | 2.066 | Note         |
|                   | Predicted wR2: Based on SigI**2 2.63 or SHELX Weight | 5.14  |              |
| PLAT978_ALERT_2_G | Number C-C Bonds with Positive Residual Density.     | 4     | Info         |

---

- 0 **ALERT level A** = Most likely a serious problem - resolve or explain
- 0 **ALERT level B** = A potentially serious problem, consider carefully
- 2 **ALERT level C** = Check. Ensure it is not caused by an omission or oversight
- 10 **ALERT level G** = General information/check it is not something unexpected

- 2 ALERT type 1 CIF construction/syntax error, inconsistent or missing data
  - 4 ALERT type 2 Indicator that the structure model may be wrong or deficient
  - 3 ALERT type 3 Indicator that the structure quality may be low
  - 2 ALERT type 4 Improvement, methodology, query or suggestion
  - 1 ALERT type 5 Informative message, check
- 
-

It is advisable to attempt to resolve as many as possible of the alerts in all categories. Often the minor alerts point to easily fixed oversights, errors and omissions in your CIF or refinement strategy, so attention to these fine details can be worthwhile. In order to resolve some of the more serious problems it may be necessary to carry out additional measurements or structure refinements. However, the purpose of your study may justify the reported deviations and the more serious of these should normally be commented upon in the discussion or experimental section of a paper or in the "special\_details" fields of the CIF. checkCIF was carefully designed to identify outliers and unusual parameters, but every test has its limitations and alerts that are not important in a particular case may appear. Conversely, the absence of alerts does not guarantee there are no aspects of the results needing attention. It is up to the individual to critically assess their own results and, if necessary, seek expert advice.

### **Publication of your CIF in IUCr journals**

A basic structural check has been run on your CIF. These basic checks will be run on all CIFs submitted for publication in IUCr journals (*Acta Crystallographica*, *Journal of Applied Crystallography*, *Journal of Synchrotron Radiation*); however, if you intend to submit to *Acta Crystallographica Section C* or *E* or *IUCrData*, you should make sure that full publication checks are run on the final version of your CIF prior to submission.

### **Publication of your CIF in other journals**

Please refer to the *Notes for Authors* of the relevant journal for any special instructions relating to CIF submission.

---

**PLATON version of 22/08/2024; check.def file version of 21/08/2024**

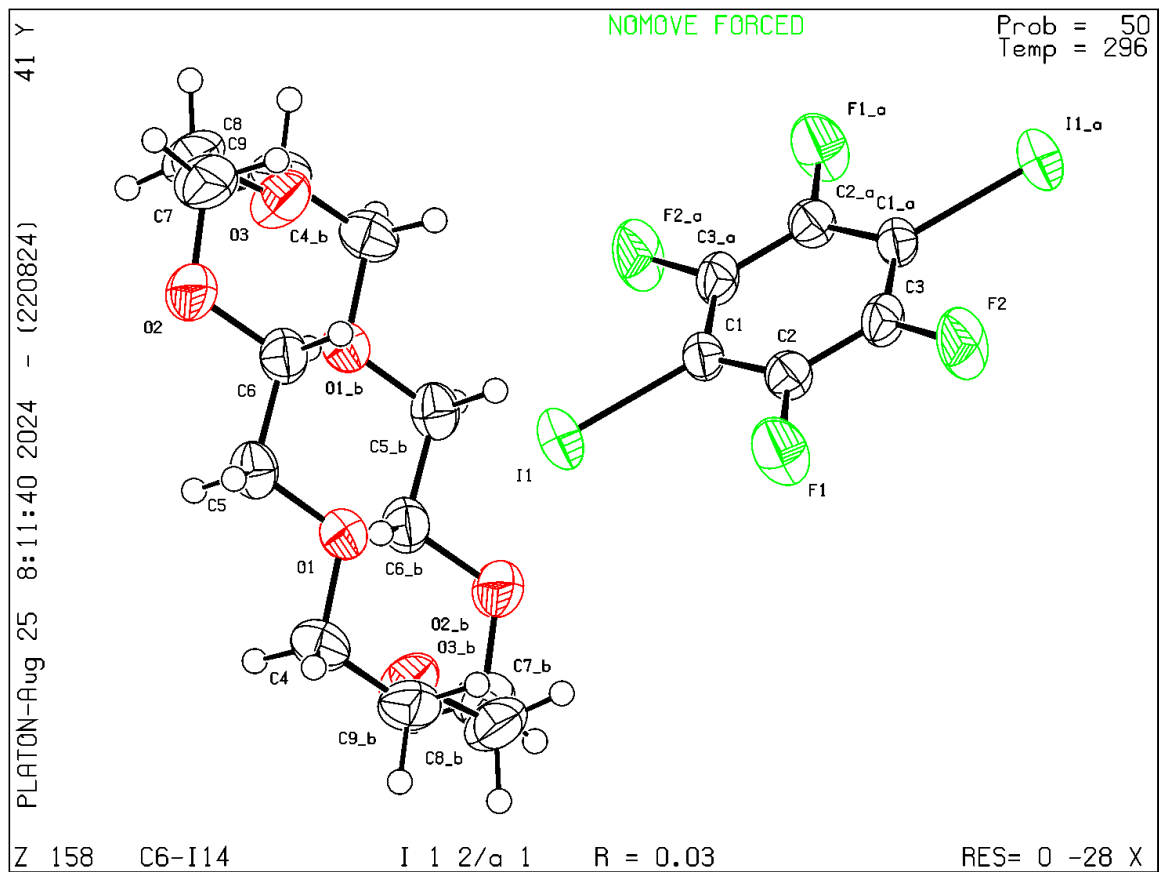

## checkCIF/PLATON report

Structure factors have been supplied for datablock(s) C6-I14-W

THIS REPORT IS FOR GUIDANCE ONLY. IF USED AS PART OF A REVIEW PROCEDURE FOR PUBLICATION, IT SHOULD NOT REPLACE THE EXPERTISE OF AN EXPERIENCED CRYSTALLOGRAPHIC REFEREE.

No syntax errors found.      CIF dictionary      Interpreting this report

### Datablock: C6-I14-W

---

Bond precision:    C-C = 0.0113 A                      Wavelength=1.54184

Cell:                      a=7.5332(5)                      b=13.1800(8)                      c=14.1357(8)  
                                    alpha=105.855(5)                      beta=91.408(5)                      gamma=103.061(5)  
Temperature:            295 K

|                        | Calculated                    | Reported         |
|------------------------|-------------------------------|------------------|
| Volume                 | 1309.59(15)                   | 1309.58(14)      |
| Space group            | P -1                          | P-1              |
| Hall group             | -P 1                          | ?                |
| Moiety formula         | C12 H24 O6, C6 F4 I2, 3(H2 O) | ?                |
| Sum formula            | C18 H30 F4 I2 O9              | C18 H30 F4 I2 O9 |
| Mr                     | 720.22                        | 720.22           |
| Dx, g cm <sup>-3</sup> | 1.827                         | 1.826            |
| Z                      | 2                             | 2                |
| Mu (mm <sup>-1</sup> ) | 19.512                        | 19.513           |
| F000                   | 704.0                         | 704.0            |
| F000'                  | 705.35                        |                  |
| h, k, lmax             | 9, 16, 17                     | 9, 16, 17        |
| Nref                   | 5195                          | 5033             |
| Tmin, Tmax             | 0.075, 0.117                  | 0.094, 0.223     |
| Tmin'                  | 0.004                         |                  |

Correction method= # Reported T Limits: Tmin=0.094 Tmax=0.223  
AbsCorr = MULTI-SCAN

Data completeness= 0.969                      Theta(max)= 72.360

R(reflections)= 0.0572( 4062)

wR2(reflections)=  
0.1642( 5033)

S = 1.026

Npar= 299

---

The following ALERTS were generated. Each ALERT has the format  
**test-name\_ALERT\_alert-type\_alert-level.**

Click on the hyperlinks for more details of the test.

---

 **Alert level A**

PLAT431\_ALERT\_2\_A Short Inter HL..A Contact I1 ..05 . 2.96 Ang.  
1-x,1-y,1-z = 2\_666 Check

**Author Response: The Checkcif software has a bug and cannot identify the halogen bond.**

---

 **Alert level C**

PLAT029\_ALERT\_3\_C \_diffn\_measured\_fraction\_theta\_full value Low . 0.969 Why?  
PLAT234\_ALERT\_4\_C Large Hirshfeld Difference O3 --C4 . 0.20 Ang.  
PLAT234\_ALERT\_4\_C Large Hirshfeld Difference C11 --C12 . 0.16 Ang.  
PLAT241\_ALERT\_2\_C High 'MainMol' Ueq as Compared to Neighbors of C6 Check  
PLAT242\_ALERT\_2\_C Low 'MainMol' Ueq as Compared to Neighbors of O1 Check  
PLAT242\_ALERT\_2\_C Low 'MainMol' Ueq as Compared to Neighbors of O2 Check  
PLAT242\_ALERT\_2\_C Low 'MainMol' Ueq as Compared to Neighbors of O3 Check  
PLAT242\_ALERT\_2\_C Low 'MainMol' Ueq as Compared to Neighbors of O4 Check  
PLAT242\_ALERT\_2\_C Low 'MainMol' Ueq as Compared to Neighbors of O6 Check  
PLAT250\_ALERT\_2\_C Large U3/U1 Ratio for Average U(i,j) Tensor .... 2.1 Note  
PLAT250\_ALERT\_2\_C Large U3/U1 Ratio for Average U(i,j) Tensor .... 3.1 Note  
PLAT260\_ALERT\_2\_C Large Average Ueq of Residue Including O7 0.168 Check  
PLAT334\_ALERT\_2\_C Small <C-C> Benzene Dist. C13 -C15\_a . 1.37 Ang.  
PLAT342\_ALERT\_3\_C Low Bond Precision on C-C Bonds ..... 0.01125 Ang.  
PLAT360\_ALERT\_2\_C Short C(sp3)-C(sp3) Bond C11 - C12 . 1.43 Ang.  
PLAT906\_ALERT\_3\_C Large K Value in the Analysis of Variance ..... 2.145 Check  
PLAT911\_ALERT\_3\_C Missing FCF Refl Between Thmin & STh/L= 0.600 6 Report  
PLAT971\_ALERT\_2\_C Check Calcd Resid. Dens. 0.96Ang From I2 1.78 eA-3  
PLAT971\_ALERT\_2\_C Check Calcd Resid. Dens. 0.92Ang From I2 1.74 eA-3  
PLAT971\_ALERT\_2\_C Check Calcd Resid. Dens. 0.97Ang From I1 1.65 eA-3  
PLAT972\_ALERT\_2\_C Check Calcd Resid. Dens. 0.90Ang From I2 -2.03 eA-3  
PLAT972\_ALERT\_2\_C Check Calcd Resid. Dens. 0.93Ang From I1 -1.85 eA-3  
PLAT972\_ALERT\_2\_C Check Calcd Resid. Dens. 0.94Ang From I1 -1.77 eA-3  
PLAT972\_ALERT\_2\_C Check Calcd Resid. Dens. 0.77Ang From I2 -1.70 eA-3  
PLAT975\_ALERT\_2\_C Check Calcd Resid. Dens. 1.05Ang From O4 . 0.43 eA-3  
PLAT976\_ALERT\_2\_C Check Calcd Resid. Dens. 0.71Ang From O7 . -0.68 eA-3  
PLAT976\_ALERT\_2\_C Check Calcd Resid. Dens. 0.78Ang From O7 . -0.59 eA-3  
PLAT976\_ALERT\_2\_C Check Calcd Resid. Dens. 0.72Ang From O7 . -0.56 eA-3

 **Alert level G**

PLAT005\_ALERT\_5\_G No Embedded Refinement Details Found in the CIF Please Do !  
PLAT007\_ALERT\_5\_G Number of Unrefined Donor-H Atoms ..... 6 Report  
PLAT154\_ALERT\_1\_G The s.u.'s on the Cell Angles are Equal ..(Note) 0.005 Degree  
PLAT899\_ALERT\_4\_G SHELXL-97 is Deprecated and Succeeded by SHELXL 2019/3 Note  
PLAT912\_ALERT\_4\_G Missing # of FCF Reflections Above STh/L= 0.600 157 Note  
PLAT978\_ALERT\_2\_G Number C-C Bonds with Positive Residual Density. 1 Info

---

1 **ALERT level A** = Most likely a serious problem - resolve or explain

0 **ALERT level B** = A potentially serious problem, consider carefully  
28 **ALERT level C** = Check. Ensure it is not caused by an omission or oversight  
6 **ALERT level G** = General information/check it is not something unexpected

1 ALERT type 1 CIF construction/syntax error, inconsistent or missing data  
24 ALERT type 2 Indicator that the structure model may be wrong or deficient  
4 ALERT type 3 Indicator that the structure quality may be low  
4 ALERT type 4 Improvement, methodology, query or suggestion  
2 ALERT type 5 Informative message, check

---

---

It is advisable to attempt to resolve as many as possible of the alerts in all categories. Often the minor alerts point to easily fixed oversights, errors and omissions in your CIF or refinement strategy, so attention to these fine details can be worthwhile. In order to resolve some of the more serious problems it may be necessary to carry out additional measurements or structure refinements. However, the purpose of your study may justify the reported deviations and the more serious of these should normally be commented upon in the discussion or experimental section of a paper or in the "special\_details" fields of the CIF. checkCIF was carefully designed to identify outliers and unusual parameters, but every test has its limitations and alerts that are not important in a particular case may appear. Conversely, the absence of alerts does not guarantee there are no aspects of the results needing attention. It is up to the individual to critically assess their own results and, if necessary, seek expert advice.

### **Publication of your CIF in IUCr journals**

A basic structural check has been run on your CIF. These basic checks will be run on all CIFs submitted for publication in IUCr journals (*Acta Crystallographica*, *Journal of Applied Crystallography*, *Journal of Synchrotron Radiation*); however, if you intend to submit to *Acta Crystallographica Section C* or *E* or *IUCrData*, you should make sure that full publication checks are run on the final version of your CIF prior to submission.

### **Publication of your CIF in other journals**

Please refer to the *Notes for Authors* of the relevant journal for any special instructions relating to CIF submission.

---

**PLATON version of 06/07/2023; check.def file version of 30/06/2023**

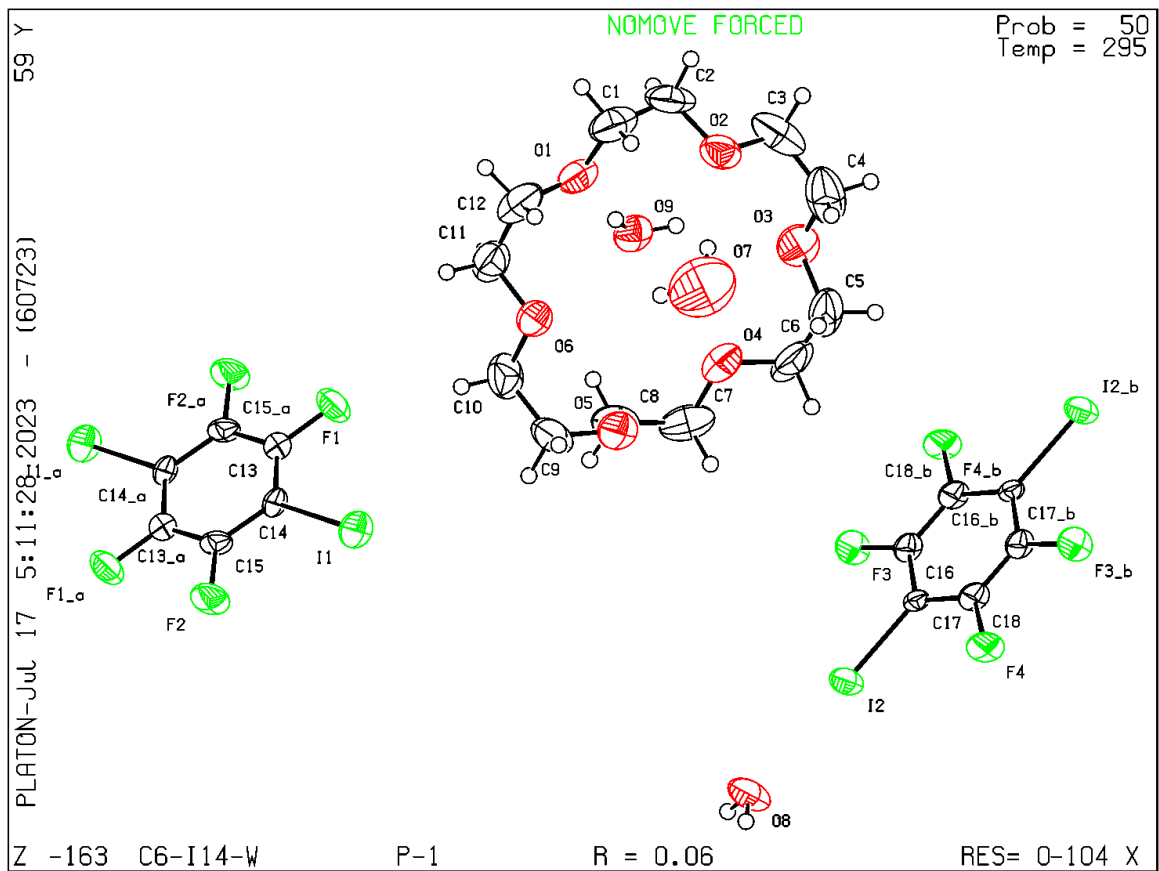

## checkCIF/PLATON report

Structure factors have been supplied for datablock(s) C6-I135

THIS REPORT IS FOR GUIDANCE ONLY. IF USED AS PART OF A REVIEW PROCEDURE FOR PUBLICATION, IT SHOULD NOT REPLACE THE EXPERTISE OF AN EXPERIENCED CRYSTALLOGRAPHIC REFEREE.

No syntax errors found.      CIF dictionary      Interpreting this report

### Datablock: C6-I135

---

|                        |                          |                          |              |
|------------------------|--------------------------|--------------------------|--------------|
| Bond precision:        | C-C = 0.0162 Å           | Wavelength=0.71073       |              |
| Cell:                  | a=8.5263 (6)             | b=25.6556 (16)           | c=8.8944 (5) |
|                        | alpha=90                 | beta=115.244 (8)         | gamma=90     |
| Temperature:           | 293 K                    |                          |              |
|                        | Calculated               | Reported                 |              |
| Volume                 | 1759.8 (2)               | 1759.8 (2)               |              |
| Space group            | P 21/c                   | P 1 21/c 1               |              |
| Hall group             | -P 2ybc                  | -P 2ybc                  |              |
| Moiety formula         | C12 H24 O6, 2 (C6 F3 I3) | 2 (C6 F3 I3), C12 H24 O6 |              |
| Sum formula            | C24 H24 F6 I6 O6         | C24 H24 F6 I6 O6         |              |
| Mr                     | 1283.83                  | 1283.87                  |              |
| Dx, g cm <sup>-3</sup> | 2.423                    | 2.423                    |              |
| Z                      | 2                        | 2                        |              |
| Mu (mm <sup>-1</sup> ) | 5.361                    | 5.361                    |              |
| F000                   | 1176.0                   | 1171.7                   |              |
| F000'                  | 1170.96                  |                          |              |
| h, k, lmax             | 10, 31, 10               | 10, 30, 10               |              |
| Nref                   | 3277                     | 3266                     |              |
| Tmin, Tmax             | 0.169, 0.324             | 0.173, 1.000             |              |
| Tmin'                  | 0.141                    |                          |              |

Correction method= # Reported T Limits: Tmin=0.173 Tmax=1.000  
AbsCorr = MULTI-SCAN

Data completeness= 0.997      Theta (max)= 25.500

|                                |                                  |
|--------------------------------|----------------------------------|
| R(reflections)= 0.0629 ( 2510) | wR2(reflections)= 0.1642 ( 3266) |
| S = 1.078                      | Npar= 189                        |



---

The following ALERTS were generated. Each ALERT has the format

**test-name\_ALERT\_alert-type\_alert-level.**

Click on the hyperlinks for more details of the test.

---

● **Alert level C**

|                   |                                                  |              |
|-------------------|--------------------------------------------------|--------------|
| PLAT042_ALERT_1_C | Calc. and Reported MoietyFormula Strings Differ  | Please Check |
| PLAT342_ALERT_3_C | Low Bond Precision on C-C Bonds .....            | 0.01622 Ang. |
| PLAT906_ALERT_3_C | Large K Value in the Analysis of Variance .....  | 9.320 Check  |
| PLAT906_ALERT_3_C | Large K Value in the Analysis of Variance .....  | 2.098 Check  |
| PLAT910_ALERT_3_C | Missing # of FCF Reflection(s) Below Theta(Min). | 8 Note       |
| PLAT911_ALERT_3_C | Missing FCF Refl Between Thmin & STh/L= 0.600    | 3 Report     |
| PLAT971_ALERT_2_C | Check Calcd Resid. Dens. 0.85Ang From I3         | 2.07 eA-3    |
| PLAT971_ALERT_2_C | Check Calcd Resid. Dens. 1.02Ang From I2         | 1.55 eA-3    |

---

● **Alert level G**

|                   |                                                  |               |
|-------------------|--------------------------------------------------|---------------|
| PLAT068_ALERT_1_G | Reported F000 Differs from Calcd (or Missing)... | Please Check  |
| PLAT083_ALERT_2_G | SHELXL Second Parameter in WGHT Unusually Large  | 16.74 Why ?   |
| PLAT199_ALERT_1_G | Reported _cell_measurement_temperature .....     | 293 Check     |
| PLAT200_ALERT_1_G | Reported _diffrn_ambient_temperature .....       | 293 Check     |
| PLAT431_ALERT_2_G | Short Inter HL..A Contact I1 ..02 .              | 3.00 Ang.     |
|                   | 1-x,-1/2+y,1/2-z =                               | 2_645 Check   |
| PLAT431_ALERT_2_G | Short Inter HL..A Contact I3 ..01 .              | 3.00 Ang.     |
|                   | x,y,z =                                          | 1_555 Check   |
| PLAT434_ALERT_2_G | Short Inter HL..HL Contact I2 ..F3 .             | 3.17 Ang.     |
|                   | 1+x,y,1+z =                                      | 1_656 Check   |
| PLAT769_ALERT_4_G | CIF Embedded Explicitly Supplied Scattering Data | Please Note   |
| PLAT941_ALERT_3_G | Average HKL Measurement Multiplicity .....       | 2.3 Low       |
| PLAT960_ALERT_3_G | Number of Intensities with I < - 2*sig(I) ...    | 1 Check       |
| PLAT967_ALERT_5_G | Note: Two-Theta Cutoff Value in Embedded .res .. | 51.0 Degree   |
| PLAT978_ALERT_2_G | Number C-C Bonds with Positive Residual Density. | 0 Info        |
| PLAT982_ALERT_1_G | The I-f' = -0.4119 Deviates from IT-value =      | -0.4742 Check |
| PLAT983_ALERT_1_G | The I-f" = 1.8326 Deviates from IT-Value =       | 1.8119 Check  |

---

0 **ALERT level A** = Most likely a serious problem - resolve or explain  
0 **ALERT level B** = A potentially serious problem, consider carefully  
8 **ALERT level C** = Check. Ensure it is not caused by an omission or oversight  
14 **ALERT level G** = General information/check it is not something unexpected

6 ALERT type 1 CIF construction/syntax error, inconsistent or missing data  
7 ALERT type 2 Indicator that the structure model may be wrong or deficient  
7 ALERT type 3 Indicator that the structure quality may be low  
1 ALERT type 4 Improvement, methodology, query or suggestion  
1 ALERT type 5 Informative message, check

---

---

It is advisable to attempt to resolve as many as possible of the alerts in all categories. Often the minor alerts point to easily fixed oversights, errors and omissions in your CIF or refinement strategy, so attention to these fine details can be worthwhile. In order to resolve some of the more serious problems it may be necessary to carry out additional measurements or structure refinements. However, the purpose of your study may justify the reported deviations and the more serious of these should normally be commented upon in the discussion or experimental section of a paper or in the "special\_details" fields of the CIF. checkCIF was carefully designed to identify outliers and unusual parameters, but every test has its limitations and alerts that are not important in a particular case may appear. Conversely, the absence of alerts does not guarantee there are no aspects of the results needing attention. It is up to the individual to critically assess their own results and, if necessary, seek expert advice.

### **Publication of your CIF in IUCr journals**

A basic structural check has been run on your CIF. These basic checks will be run on all CIFs submitted for publication in IUCr journals (*Acta Crystallographica*, *Journal of Applied Crystallography*, *Journal of Synchrotron Radiation*); however, if you intend to submit to *Acta Crystallographica Section C* or *E* or *IUCrData*, you should make sure that full publication checks are run on the final version of your CIF prior to submission.

### **Publication of your CIF in other journals**

Please refer to the *Notes for Authors* of the relevant journal for any special instructions relating to CIF submission.

---

**PLATON version of 06/07/2023; check.def file version of 30/06/2023**

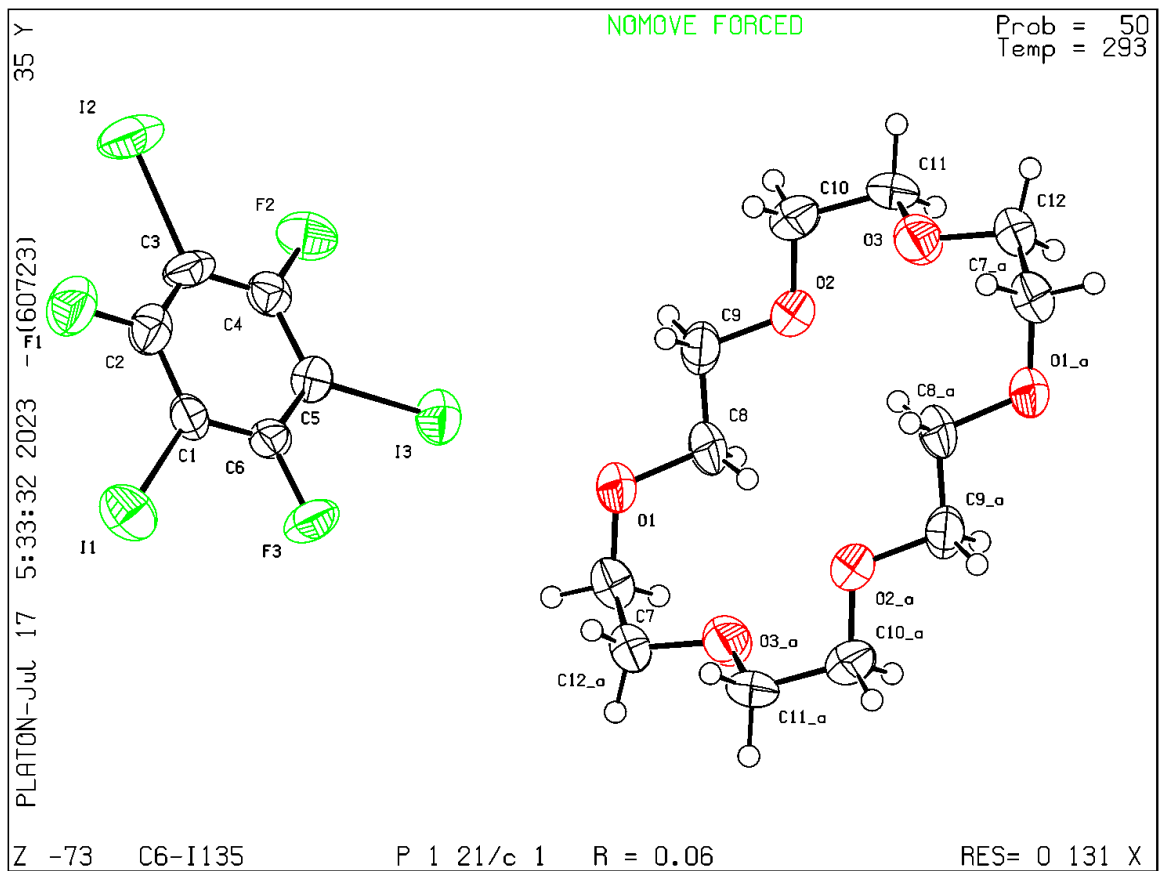

Supplement: d4ce00853g1.pdf [file d4ce00853g1.pdf]
